1 **Genomic inference of a human super bottleneck in Mid-Pleistocene**  
2 **transition**

3

4 Wangjie Hu<sup>1†</sup>, Ziqian Hao<sup>1†</sup>, Pengyuan Du<sup>1</sup>, Fabio Di Vincenzo<sup>3</sup>, Giorgio Manzi<sup>4</sup>,  
5 Yi-Hsuan Pan<sup>2\*</sup>, Haipeng Li<sup>1,5\*</sup>

6

7 <sup>1</sup>CAS Key Laboratory of Computational Biology, Shanghai Institute of Nutrition and  
8 Health, University of Chinese Academy of Sciences, Chinese Academy of Sciences;  
9 Shanghai 200031, China.

10 <sup>2</sup>Key Laboratory of Brain Functional Genomics of Ministry of Education, School of  
11 Life Science, East China Normal University; Shanghai 200062, China.

12 <sup>3</sup>Natural History Museum, University of Florence; Florence, Italy.

13 <sup>4</sup>Department of Environmental Biology, Sapienza University of Rome; Italy.

14 <sup>5</sup>Center for Excellence in Animal Evolution and Genetics, Chinese Academy of  
15 Sciences; Kunming 650223, China.

16

17 \*Corresponding Authors: [yxpan@sat.ecnu.edu.cn](mailto:yxpan@sat.ecnu.edu.cn); [lihaipeng@picb.ac.cn](mailto:lihaipeng@picb.ac.cn)

18 †These authors contributed equally to this work.

19

20

21 **Abstract:** The demographic history is a foundation of human evolutionary studies.  
22 We developed the fast infinitesimal time coalescent (FitCoal) process, which allows  
23 the accurate calculation of the composite likelihood of a site frequency spectrum and  
24 provides the precise inference of demographic history. Genomic analysis showed that  
25 African populations have passed through a population super bottleneck, a small  
26 effective size of approximately 1,280 breeding individuals between 930 and 813  
27 thousand years ago. This time interval coincides with a gap in the human fossil record  
28 in Africa and possibly marks the origin of the *Homo heidelbergensis*. Further  
29 modelling analysis confirmed the existence of the super bottleneck in non-African  
30 populations. Our results provide new insights into human evolution during the  
31 Mid-Pleistocene.

32

33

34 **One-Sentence Summary:** A new method for demographic history inference and a  
35 human super bottleneck possibly marking the origin of *H. heidelbergensis*

36

37

38            Inferring demographic history from genomic information has played an  
39 important role in population genetics. It uncovers prehistoric evolutionary events and  
40 deepens our understanding about the evolution of human and other species (1-3).  
41 Multiple methods have been developed to infer demographic history with a  
42 predefined demographic model (4-7). These methods require prior knowledge about  
43 the species being investigated and estimation parameters by fitting in summary  
44 statistics such as site frequency spectrum (SFS). In contrast, model-free methods do  
45 not need a predefined model when inferring demography (8-13). As SFS plays an  
46 essential role in demographic inference, many efforts have been attempted to derive  
47 its analytical formula under certain demographic models (14-16).

48            To precisely infer recent and ancient demography, we developed the fast  
49 infinitesimal time coalescent (FitCoal) process (Fig. 1) that calculates expected  
50 branch length for each SFS type under arbitrary demographic models. It is effective  
51 for a wide range of sample sizes in the calculation of the composite likelihood of a  
52 given SFS (4, 5). To infer the demographic history, FitCoal first maximizes the  
53 likelihood with the constant size model and then increases the number of inference  
54 time intervals and re-maximizes the likelihood until the best model is found. As  
55 inference time intervals are variable to avoid long fixed ancient time intervals, the  
56 precision in the inference of ancient demographic events can be improved. FitCoal  
57 does not need prior information on demography, and its accuracy can be confirmed by  
58 simulation.

59            With African hominid fossils, the origin of anatomically modern humans has been  
60 determined to be approximately 200 thousand years (kyr) ago (17). Although the  
61 demographic history of humans has been intensively studied (9, 10, 12, 18-21), it is  
62 conceivable that many new insights remain to be explored. Here we used FitCoal to  
63 analyze genomic sequences of the 1000 Genomes Project phase 3 (1000GP) (22) and  
64 the Human Genome Diversity Project–Centre d’Etude du Polymorphisme Humain  
65 panel (HGPD-CEPH) (23). Our results suggest that our ancestors experienced a super  
66 bottleneck and the effective size of our ancestors remained small for a very long

67 period of time (~117,000 years). The super bottleneck may represent a major  
68 transition in human evolution, possibly leading to the origin of *H. heidelbergensis*: the  
69 alleged ancestral species of modern humans (24, 25).

70

### 71 **Fast infinitesimal time coalescent process**

72 As determination of expected branch length for each SFS type is essential for  
73 theoretical population genetics and demographic inference (4, 5), we developed the  
74 fast infinitesimal time coalescent (FitCoal) process to accomplish the task (Fig. 1).  
75 For FitCoal analysis, each of millions of time intervals  $\Delta t$  was set extremely small,  
76 and the population size was assumed to be constant within each infinitesimal time  
77 interval. The probabilities of all states were calculated backward in time. During each  
78  $\Delta t$ , the branches were categorized according to their state. For each state, the branch  
79 length was multiplied by its probability and population size and then transformed to  
80 calculate the expected branch length of each SFS type. Because the expected branch  
81 length of a SFS type is equal to the sum of the expected branch length of this type  
82 during each time interval, the latter can be rescaled and tabulated, making the  
83 calculation of the expected branch lengths extremely fast under arbitrary demographic  
84 histories. Hereafter, tabulated FitCoal is referred to as FitCoal for short, unless  
85 otherwise indicated.

86

### 87 **FitCoal demographic inference**

88 After the expected branch lengths were obtained, the composite likelihood of the  
89 SFS observed in a sample was calculated (4, 5, 10, 26). As each single nucleotide  
90 polymorphism (SNP) was treated independently, FitCoal did not need phased  
91 haplotype data. When inferring demography, the likelihood was maximized in a wide  
92 range of demographic scenarios. The FitCoal likelihood surface is smooth (Fig. S1),  
93 so it is efficient to maximize the likelihood. FitCoal considered both instantaneous  
94 populations size changes (9-11) and long-term exponential changes of population in  
95 order to generate various demographic scenarios.

96

### 97 **Demographic inference on simulated data**

98 The accuracy of FitCoal was validated by simulation and comparing its  
99 demographic inferences with those of PSMC (9) and stairway plot (10) (Fig. 2). Six  
100 different demographic models, examined in the study by Liu and Fu (10), were  
101 considered by simulating 200 independent data sets under each model. The medians  
102 and 95% confidence intervals of demography were then determined by FitCoal with  
103 the assumption that a generation time is 24 years (10, 27) and the mutation rate is  
104  $1.2 \times 10^{-8}$  per site per generation for human populations (10, 28-30).

105 FitCoal was found to precisely infer demographic histories (Fig. 2), and the  
106 inference accuracy was improved by increasing sample size and length of sequence  
107 (Fig. S2). Our results confirmed that SFS allows precise recovery of the demographic  
108 history (31). In general, the confidence intervals of FitCoal inferred histories were  
109 narrower than those of PSMC and stairway plot, except for those with insufficient  
110 information on ancestral populations (Fig. 2C). The proportion of the most recent  
111 change type inferred from the six different models mentioned above also showed that  
112 FitCoal can distinguish instantaneous and exponential changes (Table S1).

113 Since a demographic event may affect every SFS type, demographic history can  
114 be inferred using a subset of SFS. Results of simulation confirmed that FitCoal  
115 accurately determined demographic history based on truncated SFSs (Fig. S3, S4),  
116 thus reducing the impact of other factors, such as positive selection (Fig. S5) and  
117 sequencing error, on FitCoal analysis.

118

### 119 **Demographic inference of African populations**

120 To infer the demographic histories of African populations, seven African  
121 populations in the 1000GP (22) were analyzed by FitCoal. Only non-coding regions,  
122 defined by GENCODE (32), were used in order to avoid the effect of purifying  
123 selection. To avoid the potential effect of positive selection (33), high-frequency  
124 mutations were excluded from the analysis.

125 Results showed that all seven African populations passed through a super  
126 bottleneck around 914 (854–1,003) kyr ago and that this bottleneck was relieved  
127 about 793 (772–815) kyr ago (Fig. 3A-C, S6; Table S2). The average effective  
128 population size of African populations during the bottleneck period was determined to  
129 be 1,270 (770–2,030). Although traces of the bottleneck were observed in previous  
130 studies, the bottleneck was ignored because its signatures were too weak to be noticed

131 (9, 11, 12, 22, 23). After the bottleneck was relieved, the population size was  
132 increased to 27,080 (25,300–29,180), a 20-fold increase, around 800 kyr ago. This  
133 population size remained relatively constant until the recent expansion.

134 To avoid the potential effects of low sequencing depth (~ 5x) of non-coding  
135 regions in the 1000GP on the analysis, the autosomal non-coding genomic  
136 polymorphism of HGDP-CEPH data set with high sequencing coverage (~35x) was  
137 used. In total, populations with more than 15 individuals each were examined. Results  
138 showed that the super bottleneck occurred between 1,257 (1,042–1,527) and 859  
139 (856–864) kyr ago in all three African populations in HGDP-CEPH (Fig. 3D-F, S7;  
140 Table S3), and the average population size during the bottleneck period was 1,300  
141 (908–1,670). This number was very similar to that (1,270) estimated from the data of  
142 1000GP.

143 After the bottleneck was relieved, the population sizes of the two HGDP-CEPH  
144 agriculturalist populations were increased to 27,300 and 27,570 (Fig. 3E, S7; Table  
145 S3), consistent with the 1000GP estimate of 27,280. However, the Biaka, a  
146 hunter-gatherer population, had a larger population size of 35,330, suggesting a deep  
147 divergence between this and other agriculturalist populations (34-36). The Biaka  
148 population was found to have a recent population decline (Fig. 3D, S7), as previously  
149 observed (23). These results suggest that hunter-gatherer populations were widely  
150 spread and decreased when agriculturalist populations were expanded.

151 To provide a precise inference of the super bottleneck, the results from the two  
152 data sets were combined. After analyzing the inferred time of instantaneous change of  
153 10 populations, the super bottleneck was inferred to last for about 117,000 years, from  
154 930 (854–1,042; s.e.m.: 23.52) to 813 (772–864; s.e.m.: 11.02) kyr ago. The effective  
155 size during the bottleneck period was precisely determined to be 1,280 (767–2,031;  
156 s.e.m.: 131). A loss of 65.85% in current genetic diversity of human populations was  
157 estimated because of the bottleneck.

158

### 159 **Demographic inference of non-African populations**

160 No super bottleneck was directly observed in all 19 non-African populations in  
161 1000GP (Fig. 3A-C, S6; Table S4). The ancestral population size of these populations  
162 was determined to be 20,260 (18,850–22,220), similar to that determined in previous  
163 studies (9, 11, 12, 23). The population size started to decline around 368 (175–756)

164 kyr ago in 1000GP non-African populations, suggesting that African and non-African  
165 divergence occurred much earlier than the out-of-Africa migration (9, 11, 12, 19, 22,  
166 23). European and South Asian populations were found to have a relatively weaker  
167 bottleneck than East Asian populations, and the bottleneck severity was found to  
168 correlate with their geographic distance to Africa, consistent with the observed  
169 correlation between heterozygosity and geographic distance (21, 37). A weak  
170 bottleneck was observed in American populations, probably because of recent  
171 admixture (22). All 1000GP non-African populations were found to increase in size  
172 recently.

173 The super bottleneck was also not directly detected in all 21 HGDP-CEPH  
174 non-African populations (Fig. 3D-F S7; Table S5). The ancestral population size of  
175 these populations was determined to be 20,030 (19,060–21,850), very similar to that  
176 (20,260) estimated from 1000GP. These populations started to decline 367 (167–628)  
177 kyr ago. A positive correlation was also observed between the severity of  
178 out-of-Africa bottleneck and their geographic distance to Africa. The Middle East  
179 populations had the weakest bottleneck, while the Maya, an American population, had  
180 the strongest bottleneck. Similar to 1000GP non-African populations, most  
181 HGDP-CEPH non-African populations were found to increase in size recently, except  
182 an isolated Kalash population, consistent with previous studies (23, 38).

183

#### 184 **Super bottleneck in the early Middle Pleistocene**

185 Although a super bottleneck was detected in all 10 African populations, such  
186 bottleneck was not directly detected in all 40 non-African populations. To investigate  
187 this phenomenon, simulations were performed with three 1000GP demographic  
188 models, designated Bottleneck I, II, and III (Fig. 4). Bottleneck I simulated the  
189 average inferred demographic history of African populations with the super  
190 bottleneck, and Bottleneck II and III simulated the demography of non-African  
191 populations without and with the super bottleneck. Both Bottleneck I and II were  
192 inferred correctly as a corresponding bottleneck was found in all simulated data sets  
193 (Table S6). However, no super bottleneck was detected in Bottleneck III simulations.  
194 The super bottleneck was found to cause a population size gap between the true model  
195 and inferred demographic history after the bottleneck was relieved, suggesting a  
196 hidden effect of the super bottleneck on non-African populations. Simulations were

197 then extended to HGDP-CEHP populations with Bottleneck models IV–VI, and  
198 similar results were obtained (Fig. S8; Table S7). When simulations were performed  
199 on three artificial models (Bottleneck VII–IX) with various demographic parameters,  
200 a population size gap was still detected (Fig. S9; Table S8). These results suggest a  
201 hidden effect of the super bottleneck on non-African populations.

202 The population size gap was found in both 1000GP and HGDP-CEPH data sets  
203 (Fig. 3A, D). After the bottleneck was relieved, the average population sizes of  
204 non-African populations were determined to be 20,260 and 20,030, respectively,  
205 while those of African agriculturalist populations were 27,080 and 27,440,  
206 respectively in these two data sets. The observed population size gap was 7,020,  
207 probably due to the hidden effect of the super bottleneck on non-African populations.

208 The reasons were then investigated why the super bottleneck had different effects  
209 on African and non-African populations. Results showed that non-African populations  
210 had the out-of-Africa bottleneck, but African populations lacked such bottleneck.  
211 Therefore, the standard coalescent time of non-African populations was larger than  
212 that of African populations (Fig. 3C, F). As African populations had more coalescent  
213 events occurred during the bottleneck period, the bottleneck was more readily  
214 detected. The mathematical proof on this issue was described in the supplemental  
215 material.

216

## 217 **Discussion**

218 In this study, we develop FitCoal, a novel model-flexible tool for demographic  
219 inference. Key characteristic features of FitCoal are that the composite likelihood can  
220 be rapidly calculated based on expected branch lengths and that inference time  
221 intervals are variable during the demographic inference. Since coalescent events  
222 become rare when tracing backward in time, the length of time interval is usually set  
223 to increase progressively (9-12). Although this strategy can capture recent  
224 demographic events, it may miss ancient ones. As FitCoal uses variable time intervals,  
225 it can give an accurate inference for both recent and ancient demographic events.

226 The most important discovery with FitCoal in this study is that human ancestors  
227 passed through a super bottleneck. The ancient population size reduction around 930  
228 kyr ago was likely to be driven by the climatic changes at the transition between the  
229 Early and Middle Pleistocene (39). During the transition, low-amplitude 41 kyr



230 obliquity-dominated glacial cycles shifted to quasi-periodic, low frequency 100 kyr  
231 periodicity, and climate change became more extreme and unpredictably associated  
232 with a longer dry period in Africa and a large faunal turnover in Africa and Eurasia  
233 (40). Coinciding with this date, archaic humans referable to African *Homo erectus*  
234 became extinct. Subsequently, from about 900 until 600 kyr ago, there is a gap in the  
235 human fossil record in Africa (Fig. S10). Only few fossil specimens have been found  
236 in this time span, such as the cranial fragments from Gombore in Ethiopia and the  
237 mandibles from Tighenif in Algeria, all of which show features linked to later *H.*  
238 *heidelbergensis* representatives and represent the evolutionary origin of this species  
239 (24). As a matter of fact, our data suggest that the ancestors of modern humans had a  
240 very small effective size of approximately 1,280 breeding individuals during the  
241 bottleneck period. This number is comparable in the same magnitude in the effective  
242 size of mammals threatened by extinction (41).

243 A rapid population recovery was inferred in all 10 African populations with a  
244 20-fold population growth during a short time period around 813 kyr ago. The earliest  
245 archaeological evidence for human control of fire was found in Israel 790 kyr ago  
246 (42). As the control of fire profoundly affected social evolution (43) and brain size  
247 (44), it may be associated with the big bang in population size at the end of the super  
248 bottleneck.

249 The super bottleneck, which started about one million years ago, might represent  
250 a speciation event at the origin of *H. heidelbergensis* (24) and should be strongly  
251 related to the gap in the fossil record. The questions about where the small ancient  
252 population dwelt, and how they survived for such a long time, remain to be  
253 investigated. As Neanderthals and Denisovans diverged with modern humans between  
254 440 and 270 kyr ago (45, 46), it is conceivable that their ancestors also passed through  
255 the super bottleneck. In the future, a more detailed picture of human evolution during  
256 the Pleistocene may be revealed because more genomic sequences of present  
257 populations and those of archaic hominins as well as more advanced population  
258 genomics methods will be available.

259

260

261 **Acknowledgement:** We thank Daniel Zivković for sharing his codes to calculate the  
262 expected branch length, and Xiaoming Liu for sharing his simulated results. This  
263 work was supported by grants from the Strategic Priority Research Program of the  
264 Chinese Academy of Sciences (XDB13040800), the National Natural Science  
265 Foundation of China (nos. 31100273, 31172073, 91131010), and National Key  
266 Research and Development Project (No. 2020YFC0847000).

267

268 **Author contributions:** W.H., Z.H., Y.H.P., and H.L. conceived and designed the  
269 research; W.H., Z.H., and H.L. wrote the code; W.H., Z.H., P.D., F.D.V., G.M., and  
270 Y.H.P. analyzed the data; W.H., Z.H., P.D., F.D.V., G.M., Y.H.P., and H.L. wrote the  
271 paper.

272

273 **Competing interests:** The authors declare no competing interests.

274

275 **Data and materials availability:** The authors declare that all data are available in the  
276 main text or the supplementary materials. FitCoal is a free plug-in of the eGPS  
277 software (47) and can be downloaded and run as an independent package. FitCoal and  
278 its documentation are available via Zenodo at  
279 <https://zenodo.org/record/4765447#.YKDt7aG-vuq>, our institute website at  
280 <http://www.picb.ac.cn/evolgen/>, and eGPS website <http://www.egps-software.net/>.

281

## 282 **References and Notes**

- 283 1. J. Y. Hu *et al.*, Genomic consequences of population decline in critically endangered pangolins  
284 and their demographic histories. *Natl. Sci. Rev.* **7**, 798-814 (2020).
- 285 2. L. Zeng *et al.*, Out of southern East Asia of the brown rat revealed by large-scale genome  
286 sequencing. *Mol. Biol. Evol.* **35**, 149-158 (2018).
- 287 3. X. Mao *et al.*, The deep population history of northern East Asia from the Late Pleistocene to  
288 the Holocene. *Cell*, (2021).
- 289 4. H. Li, W. Stephan, Inferring the demographic history and rate of adaptive substitution in  
290 *Drosophila*. *PLoS Genet.* **2**, e166 (2006).
- 291 5. L. Excoffier, I. Dupanloup, E. Huerta-Sanchez, V. C. Sousa, M. Foll, Robust demographic  
292 inference from genomic and SNP data. *PLoS Genet.* **9**, e1003905 (2013).
- 293 6. R. C. Griffiths, S. Tavaré Monte Carlo inference methods in population genetics. *Math.*  
294 *Comput. Modell.* **23**, 141-158 (1996).
- 295 7. R. N. Gutenkunst, R. D. Hernandez, S. H. Williamson, C. D. Bustamante, Inferring the joint  
296 demographic history of multiple populations from multidimensional SNP frequency data.  
297 *PLoS Genet.* **5**, e1000695 (2009).
- 298 8. J. Heled, A. J. Drummond, Bayesian inference of population size history from multiple loci.  
299 *BMC Evol. Biol.* **8**, 289 (2008).
- 300 9. H. Li, R. Durbin, Inference of human population history from individual whole-genome  
301 sequences. *Nature* **475**, 493-496 (2011).
- 302 10. X. M. Liu, Y. X. Fu, Exploring population size changes using SNP frequency spectra. *Nat.*  
303 *Genet.* **47**, 555-559 (2015).
- 304 11. S. Schiffels, R. Durbin, Inferring human population size and separation history from multiple  
305 genome sequences. *Nat. Genet.* **46**, 919-925 (2014).
- 306 12. J. Terhorst, J. A. Kamm, Y. S. Song, Robust and scalable inference of population history from  
307 hundreds of unphased whole genomes. *Nat. Genet.* **49**, 303-309 (2017).
- 308 13. X. Liu, Y. X. Fu, Stairway Plot 2: demographic history inference with folded SNP frequency  
309 spectra. *Genome Biol.* **21**, 280 (2020).
- 310 14. J. Jouganous, W. Long, A. P. Ragsdale, S. Gravel, Inferring the joint demographic history of

- 311 multiple populations: beyond the diffusion approximation. *Genetics* **206**, 1549-1567 (2017).
- 312 15. Y. X. Fu, Statistical properties of segregating sites. *Theor. Popul. Biol.* **48**, 172-197 (1995).
- 313 16. D. Zivković, T. Wiehe, Second-order moments of segregating sites under variable population  
314 size. *Genetics* **180**, 341-357 (2008).
- 315 17. T. D. White *et al.*, Pleistocene *Homo sapiens* from Middle Awash, Ethiopia. *Nature* **423**,  
316 742-747 (2003).
- 317 18. M. Stoneking, J. Krause, Learning about human population history from ancient and modern  
318 genomes. *Nat. Rev. Genet.* **12**, 603-614 (2011).
- 319 19. R. Nielsen *et al.*, Tracing the peopling of the world through genomics. *Nature* **541**, 302-310  
320 (2017).
- 321 20. A. Manica, W. Amos, F. Balloux, T. Hanihara, The effect of ancient population bottlenecks on  
322 human phenotypic variation. *Nature* **448**, 346-348 (2007).
- 323 21. S. Ramachandran *et al.*, Support from the relationship of genetic and geographic distance in  
324 human populations for a serial founder effect originating in Africa. *Proc. Natl. Acad. Sci. USA*  
325 **102**, 15942-15947 (2005).
- 326 22. D. M. Altshuler *et al.*, A global reference for human genetic variation. *Nature* **526**, 68-74  
327 (2015).
- 328 23. A. Bergstrom *et al.*, Insights into human genetic variation and population history from 929  
329 diverse genomes. *Science* **367**, eaay5012 (2020).
- 330 24. C. Stringer, The origin and evolution of *Homo sapiens*. *Philos. Trans. R. Soc. Lond., Ser. B:*  
331 *Biol. Sci.* **371**, 20150237 (2016).
- 332 25. A. Profico, F. Di Vincenzo, L. Gagliardi, M. Piperno, G. Manzi, Filling the gap. Human  
333 cranial remains from Gombore II (Melka Kunture, Ethiopia; ca. 850 ka) and the origin of  
334 *Homo heidelbergensis*. *J. Anthropol. Sci.* **94**, 41-63 (2016).
- 335 26. R. R. Hudson, Two-locus sampling distributions and their application. *Genetics* **159**,  
336 1805-1817 (2001).
- 337 27. A. Scally, R. Durbin, Revising the human mutation rate: implications for understanding  
338 human evolution. *Nat. Rev. Genet.* **13**, 745-753 (2012).
- 339 28. C. D. Campbell *et al.*, Estimating the human mutation rate using autozygosity in a founder  
340 population. *Nat. Genet.* **44**, 1277-1281 (2012).

- 341 29. D. F. Conrad *et al.*, Variation in genome-wide mutation rates within and between human  
342 families. *Nat. Genet.* **43**, 712-714 (2011).
- 343 30. A. Kong *et al.*, Rate of de novo mutations and the importance of father's age to disease risk.  
344 *Nature* **488**, 471-475 (2012).
- 345 31. A. Bhaskar, Y. S. Song, Descartes' rule of signs and the identifiability of population  
346 demographic models from genomic variation data. *Ann. Stat.* **42**, 2469-2493 (2014).
- 347 32. A. Frankish *et al.*, GENCODE reference annotation for the human and mouse genomes.  
348 *Nucleic Acids Res.* **47**, D766-D773 (2019).
- 349 33. J. C. Fay, C.-I. Wu, Hitchhiking under positive Darwinian selection. *Genetics* **155**, 1405-1413  
350 (2000).
- 351 34. P. Hsieh *et al.*, Model-based analyses of whole-genome data reveal a complex evolutionary  
352 history involving archaic introgression in Central African Pygmies. *Genome Res.* **26**, 291-300  
353 (2016).
- 354 35. C. M. Schlebusch, M. Jakobsson, Tales of human migration, admixture, and selection in  
355 Africa. *Annu. Rev. Genomics Hum. Genet.* **19**, 405-428 (2018).
- 356 36. P. Skoglund *et al.*, Reconstructing prehistoric African population structure. *Cell* **171**, 59-71  
357 (2017).
- 358 37. F. Prugnolle, A. Manica, F. Balloux, Geography predicts neutral genetic diversity of human  
359 populations. *Curr. Biol.* **15**, R159-160 (2005).
- 360 38. Q. Ayub *et al.*, The Kalash genetic isolate: ancient divergence, drift, and selection. *Am. J. Hum.*  
361 *Genet.* **96**, 775-783 (2015).
- 362 39. L. E. Lisiecki, M. E. Raymo, A Pliocene-Pleistocene stack of 57 globally distributed benthic  
363  $\delta^{18}\text{O}$  records. *Paleoceanography* **20**, PA1003 (2005).
- 364 40. M. J. Head, B. Pillans, S. A. Farquhar, The Early-Middle Pleistocene transition:  
365 characterization and proposed guide for the defining boundary. *Episodes* **31**, 255 (2008).
- 366 41. H. Li *et al.*, Large numbers of vertebrates began rapid population decline in the late 19th  
367 century. *Proc. Natl. Acad. Sci. USA* **113**, 14079-14084 (2016).
- 368 42. N. Goren-Inbar *et al.*, Evidence of hominin control of fire at Gesher Benot Ya'aqov, Israel.  
369 *Science* **304**, 725-727 (2004).
- 370 43. R. Foley, C. Gamble, The ecology of social transitions in human evolution. *Philos. Trans. R.*

- 371            *Soc. Lond., Ser. B: Biol. Sci.* **364**, 3267-3279 (2009).
- 372    44.    M. Melchionna *et al.*, From smart apes to human brain boxes. A uniquely derived brain shape  
373            in late hominins clade. *Front. Earth Sci.* **8**, 273 (2020).
- 374    45.    R. E. Green *et al.*, A draft sequence of the Neandertal genome. *Science* **328**, 710-722 (2010).
- 375    46.    D. Reich *et al.*, Genetic history of an archaic hominin group from Denisova Cave in Siberia.  
376            *Nature* **468**, 1053-1060 (2010).
- 377    47.    D. Yu *et al.*, eGPS 1.0: comprehensive software for multi-omic and evolutionary analyses.  
378            *Natl. Sci. Rev.* **6**, 867-869 (2019).
- 379    48.    H. C. Harpending *et al.*, Genetic traces of ancient demography. *Proc. Natl. Acad. Sci. USA* **95**,  
380            1961-1967 (1998).
- 381
- 382

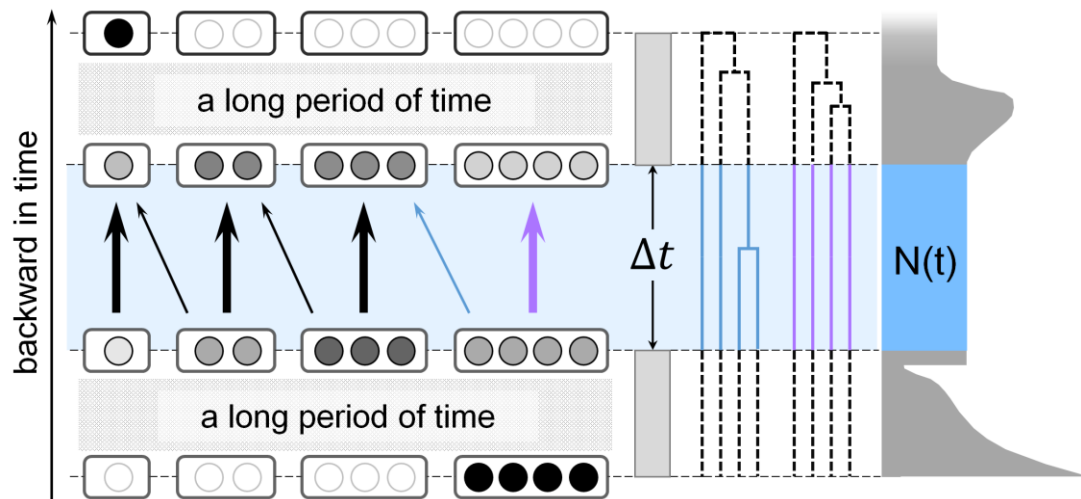

383

384 **Fig. 1. Illustration of the fast infinitesimal time coalescent (FitCoal) process.** The  
385 left panel shows the backward process in which four lineages coalesce into one after  
386 passing through millions of infinitesimal time intervals. The highlighted area shows  
387 the backward transformation process of different states with tiny probability changes  
388 in an infinitesimal time interval ( $\Delta t$ ). Thick arrows indicate high transformation  
389 probabilities, and thin arrows indicate low transformation probabilities. Each state is  
390 indicated with a rounded rectangle, in which one circle indicates one lineage. The  
391 rounded rectangles with black filled circles are the states with probability 1. The  
392 rounded rectangles with empty circles are the states with probability 0. The  
393 probabilities between 0 and 1 are indicated by grey circles. The middle panel shows  
394 branches of different states. The right panel shows the demographic history of a  
395 population. The width of shadowed area indicate the effective population size, *i.e.*, the  
396 number of breeding individuals ( $4\delta$ ). It is assumed that the effective population size  
397 remains unchanged within  $\Delta t$ .

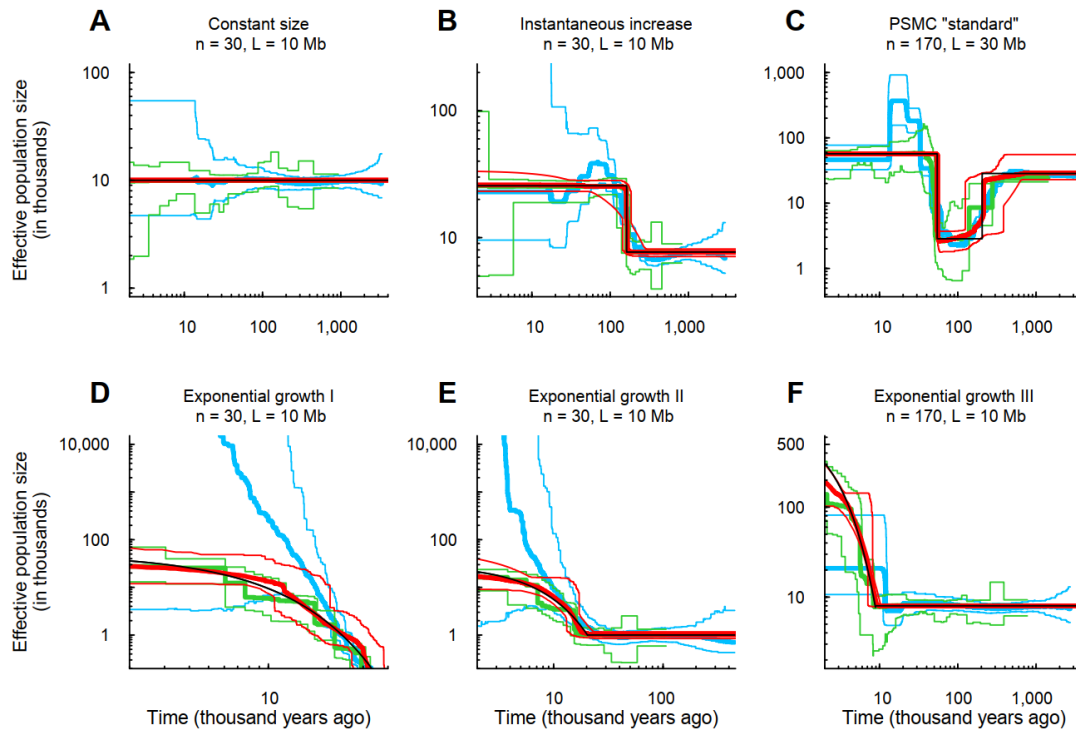

398

399 **Fig. 2. Demographic histories estimated by FitCoal, stairway plot, and PSMC**  
400 **using simulated samples. (A) Constant size model. (B) Instantaneous increase model.**  
401 **(C) PSMC “standard” model. (D) Exponential growth I model. (E) Exponential**  
402 **growth II model. (F) Exponential growth III model. These six models are the same as**  
403 **those of the previous study by Liu and Fu (10). Thin black lines indicate true models.**  
404 **Thick red lines indicate the medians of FitCoal estimated histories; thin red lines are**  
405 **2.5 and 97.5 percentiles of FitCoal estimated histories. Green and blue lines indicate**  
406 **the results of stairway plot and PSMC, respectively, of the previous study (10). The**  
407 **mutation rate is assumed to be  $1.2 \times 10^{-8}$  per base per generation, and a generation**  
408 **time is assumed to be 24 years.  $n$  is the number of simulated sequences, and  $L$  is the**  
409 **length of simulated sequences.**

410



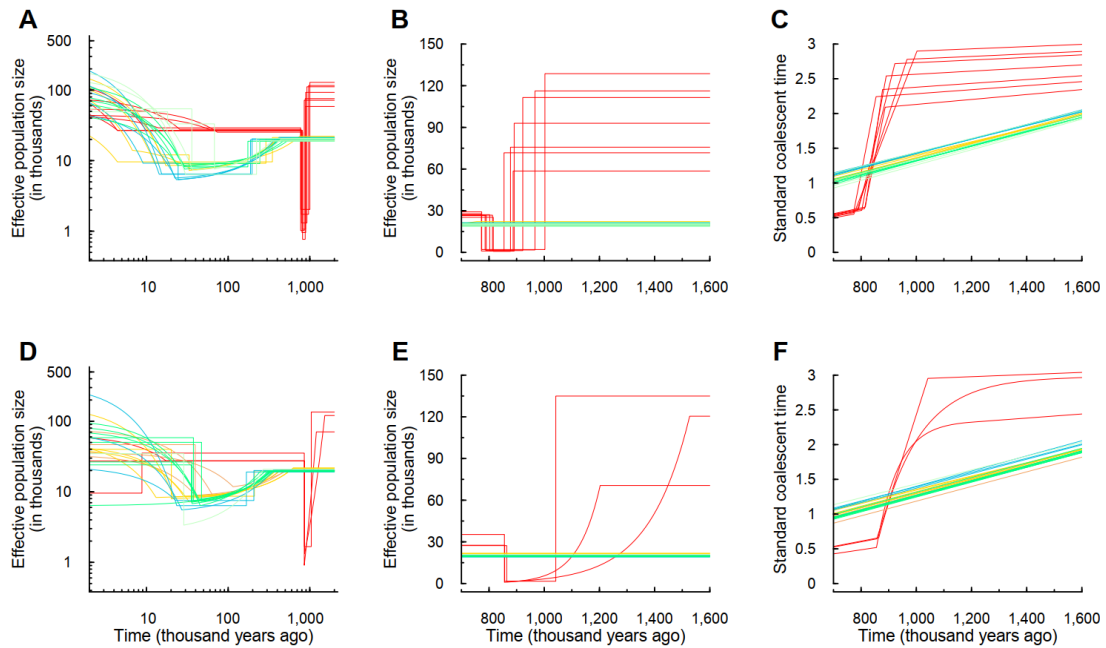

411

412 **Fig. 3. FitCoal estimated histories of human populations using 1000GP and**  
413 **HGPD-CEPH genomic data sets. (A)** Estimated histories of 26 populations in  
414 1000GP. **(B)** Linear-scaled estimation of histories of 1000GP populations during the  
415 super bottleneck period. **(C)** Calendar time vs standard coalescent time of estimated  
416 histories of 1000GP populations. **(D)** Estimated histories of 24 HGPD-CEPH  
417 populations. **(E)** Linear-scaled estimation of histories of HGPD-CEPH populations  
418 during the super bottleneck period. **(F)** Calendar time vs standard coalescent time of  
419 estimated histories of HGPD-CEPH populations. Various color lines indicate the  
420 following: red, African populations; yellow, European populations; brown, Middle  
421 East populations; blue, East Asian populations; green, Central or South Asian  
422 populations; and dark sea green, American populations. The mutation rate is assumed  
423 to be  $1.2 \times 10^{-8}$  per base per generation, and a generation time is assumed to be 24  
424 years.

425

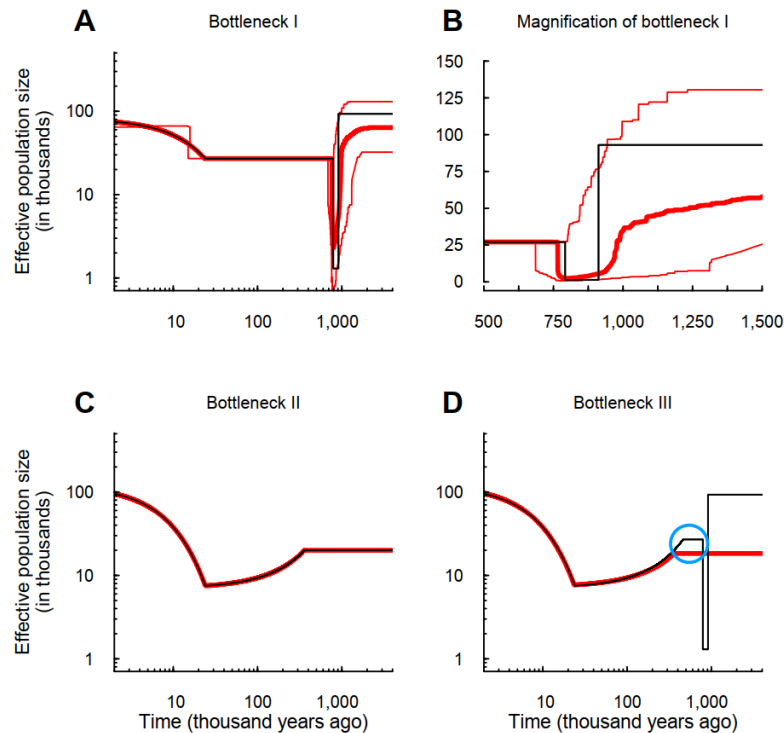

426

427 **Fig. 4. Verification of the super bottleneck.** (A) Bottleneck I model, mimicking the  
428 demography of 1000GP African population and its estimated histories. (B)  
429 Linear-scaled Bottleneck I model during the super bottleneck period. (C) Bottleneck  
430 II model, mimicking the estimated demography of 1000GP non-African population  
431 and its estimated histories. (D) Bottleneck III model, mimicking the true demography  
432 of 1000GP non-African population and its estimated histories. Thin black lines  
433 indicate models. Thick red lines denote the medians of FitCoal estimated histories;  
434 thin red lines represent 2.5 and 97.5 percentiles of FitCoal estimated histories. Blue  
435 circle indicates the population size gap. The mutation rate is assumed to be  
436  $1.2 \times 10^{-8}$  per base per generation, and a generation time is assumed to be 24 years.  
437 The number of simulated sequences is 202 in Bottleneck I and 200 in Bottleneck II  
438 and III. The length of simulated sequence is 800 Mb.

439

440

441

442
