1      **Genomic inference of a human super bottleneck in Mid-Pleistocene transition**

2

3      Wangjie Hu<sup>1†</sup>, Ziqian Hao<sup>1†</sup>, Pengyuan Du<sup>1</sup>, Fabio Di Vincenzo<sup>3</sup>, Giorgio Manzi<sup>4</sup>,

4                                      Yi-Hsuan Pan<sup>2\*</sup>, Haipeng Li<sup>1,5,6\*</sup>

5

6      <sup>1</sup>CAS Key Laboratory of Computational Biology, Shanghai Institute of Nutrition and  
7                      Health, University of Chinese Academy of Sciences, Chinese Academy of  
8                      Sciences; Shanghai 200031, China.

9      <sup>2</sup>Key Laboratory of Brain Functional Genomics of Ministry of Education, School of  
10                     Life Science, East China Normal University; Shanghai 200062, China.

11     <sup>3</sup>Natural History Museum, University of Florence; Florence, Italy.

12     <sup>4</sup>Department of Environmental Biology, Sapienza University of Rome; Italy.

13     <sup>5</sup>Center for Excellence in Animal Evolution and Genetics, Chinese Academy of  
14                     Sciences; Kunming 650223, China.

15     <sup>6</sup>Lead Contact

16

17     \*Corresponding Authors: [yxpan@sat.ecnu.edu.cn](mailto:yxpan@sat.ecnu.edu.cn); [lihaipeng@picb.ac.cn](mailto:lihaipeng@picb.ac.cn)

18     †These authors contributed equally to this work.

19

20

21 **SUMMARY**

22 The demographic history is a foundation of human evolutionary studies. However, the  
23 ancient demographic history during the Mid-Pleistocene is poorly investigated while  
24 it is essential for understanding the early origin of humankind. Here we present the  
25 fast infinitesimal time coalescent (FitCoal) process, which allows the analytical  
26 calculation of the composite likelihood of a site frequency spectrum and provides the  
27 precise inference of demographic history. We apply it to analyze 3,154 present-day  
28 human genomic sequences. We find that African populations have passed through a  
29 population super bottleneck, a small effective size of approximately 1,280 breeding  
30 individuals between 930 and 813 thousand years ago. Further analyses confirm the  
31 existence of the super bottleneck on non-African populations although it cannot be  
32 directly inferred. This observation, together with simulation results, indicates that  
33 confounding factors, such as population structure and selection, are unlikely to affect  
34 the inference of the super bottleneck. The time interval of the super bottleneck  
35 coincides with a gap in the human fossil record in Africa and possibly marks the  
36 origin of *Homo heidelbergensis*. Our results provide new insights into human  
37 evolution during the Mid-Pleistocene.

38

39

40 **Keywords**

41 Demographic history inference, FitCoal, site frequency spectrum, population  
42 bottleneck, Mid-Pleistocene transition

43

44

## 45 INTRODUCTION

46 With African hominid fossils, the origin of anatomically modern humans has  
47 been determined to be approximately 200 thousand years (kyr) ago (White et al.,  
48 2003). Based on present-day human genomes, the recent demographic history of  
49 humans has been intensively studied which reveals the world-wide spread of our  
50 ancestors (Li and Durbin, 2011; Liu and Fu, 2015; Manica et al., 2007; Nielsen et al.,  
51 2017; Ramachandran et al., 2005; Stoneking and Krause, 2011; Terhorst et al., 2017).  
52 However, the ancient demographic history during the Mid-Pleistocene is still poorly  
53 investigated while it is essential for understanding the early origin of humankind. It is  
54 mainly due to limitations of existed methods since this task requires a precise estimate  
55 for the ancient demographic history. Thus a novel approach is needed to improve the  
56 inference accuracy of demographic history.

57 As site frequency spectrum (SFS) plays an essential role in demographic  
58 inference (Excoffier et al., 2013; Griffiths and Tavaré 1996; Gutenkunst et al., 2009;  
59 Li and Stephan, 2006; Liu and Fu, 2020; Liu and Fu, 2015; Terhorst et al., 2017),  
60 many efforts have been made to derive its analytical formula under a predefined  
61 demographic model (Fu, 1995; Jouganous et al., 2017; Zivković and Wiehe, 2008).  
62 Therefore, to precisely infer recent and ancient demography, we developed the fast  
63 infinitesimal time coalescent (FitCoal) process (Figure 1) that analytically derives  
64 expected branch length for each SFS type under arbitrary demographic models. It is  
65 effective for a wide range of sample sizes in the analytical calculation of the  
66 composite likelihood of a given SFS. FitCoal first maximizes the likelihood with the  
67 constant size model and then increases the number of inference time intervals and  
68 re-maximizes the likelihood until the best model is found. FitCoal does not need prior  
69 information on demography, and its accuracy is confirmed by simulation. The  
70 demographic inference of FitCoal is more precise than that of PSMC (Li and Durbin,  
71 2011) and stairway plot (Liu and Fu, 2015), and the effects of positive selection and  
72 sequencing error can be easily excluded.

73 We then used FitCoal to analyze large sets of present-day human genomic

74 sequences sampled from 10 African and 40 non-African populations. The inferred  
75 recent demographic histories, including recent population size expansion/reduction  
76 and the out-of-African bottleneck, are consistent with previous studies (Altshuler et  
77 al., 2015; Bergstrom et al., 2020; Li and Durbin, 2011; Prugnolle et al., 2005;  
78 Ramachandran et al., 2005; Schiffels and Durbin, 2014; Terhorst et al., 2017).  
79 However, we found that our ancestors experienced a super bottleneck and the  
80 effective size of our ancestors remained small (about 1,280 breeding individuals)  
81 between 930 and 813 thousand years ago. The super bottleneck was directly inferred  
82 on African populations but only indirectly detected on non-African populations,  
83 which is expected by the coalescent theory. This observation, together with simulation  
84 results, indicates that confounding factors, such as population structure and selection,  
85 are unlikely to affect the inference of the super bottleneck during the Mid-Pleistocene.  
86 The super bottleneck not only explains a gap of the human fossil record in Africa  
87 between roughly 900 and 600 kyr ago (Profico et al., 2016), but also may represent a  
88 major transition in human evolution, possibly leading to the origin of *H.*  
89 *heidelbergensis*: the alleged ancestral species of modern humans (Profico et al., 2016;  
90 Stringer, 2016).

91

## 92 **RESULTS**

### 93 **Fast Infinitesimal Time Coalescent Process**

94 As analytical result of expected branch length for each SFS type is essential for  
95 theoretical population genetics and demographic inference (Excoffier et al., 2013; Fu,  
96 1995; Li and Stephan, 2006; Zivković and Wiehe, 2008), we developed the fast  
97 infinitesimal time coalescent (FitCoal) process to accomplish the task (Figure 1). The  
98 analytical result of expected branch length for each SFS type was presented in the  
99 STAR★METHODS. For FitCoal calculation, each of millions of time intervals  $\Delta t$   
100 was set extremely small, and the population size was assumed to be constant within  
101 each infinitesimal time interval. The probabilities of all states were calculated  
102 backward in time. During each  $\Delta t$ , the branches were categorized according to their  
103 state. For each state, the branch length was multiplied by its probability and  
104 population size and then transformed to calculate the expected branch length of each

105 SFS type. Because the expected branch length of a SFS type is equal to the sum of the  
106 expected branch length of this type during each time interval, the latter can be  
107 rescaled and tabulated, making the calculation of the expected branch lengths  
108 extremely fast under arbitrary demographic histories. Hereafter, tabulated FitCoal is  
109 referred to as FitCoal for short, unless otherwise indicated.

110

### 111 **FitCoal Demographic Inference**

112 After the expected branch lengths were obtained, the composite likelihood of the  
113 SFS observed in a sample was calculated (Excoffier et al., 2013; Hudson, 2001; Li  
114 and Stephan, 2006; Liu and Fu, 2015). As each single nucleotide polymorphism (SNP)  
115 was treated independently, FitCoal did not need phased haplotype data. When  
116 inferring demography, the likelihood was maximized in a wide range of demographic  
117 scenarios. The FitCoal likelihood surface is smooth (Figure S1), so it is efficient to  
118 maximize the likelihood. FitCoal considered both instantaneous populations size  
119 changes (Li and Durbin, 2011; Liu and Fu, 2015; Schiffels and Durbin, 2014) and  
120 long-term exponential changes of population in order to generate various  
121 demographic scenarios.

122

### 123 **Demographic Inference on Simulated Data**

124 The accuracy of FitCoal was validated by simulation and comparing its  
125 demographic inferences with those of PSMC (Li and Durbin, 2011) and stairway plot  
126 (Liu and Fu, 2015) (Figure 2). Six demographic models, examined in the former study  
127 (Liu and Fu, 2015), were considered by simulating 200 independent data sets under  
128 each model. The medians and 95% confidence intervals of demography were then  
129 determined by FitCoal with the assumption that a generation time is 24 years (Liu and  
130 Fu, 2015; Scally and Durbin, 2012) and the mutation rate is  $1.2 \times 10^{-8}$  per site per  
131 generation for human populations (Campbell et al., 2012; Conrad et al., 2011; Kong et  
132 al., 2012; Liu and Fu, 2015).

133 FitCoal was found to precisely infer demographic histories (Figure 2). In general,  
134 the confidence intervals of FitCoal-inferred histories were narrower than those of  
135 PSMC and stairway plot, indicating a better FitCoal-demographic inference. The  
136 inference accuracy can be improved by increasing sample size and length of sequence  
137 (Figure S2). Our results confirmed that SFS allows precise recovery of the

138 demographic history (Bhaskar and Song, 2014). The proportion of the most recent  
139 change type inferred from six models above showed that FitCoal can distinguish  
140 instantaneous and exponential changes (Table S1).

141 Since a demographic event may affect every SFS type, demographic history can  
142 be inferred using a subset of SFS. Results of simulation confirmed that FitCoal  
143 accurately determined demographic history based on truncated SFSs (Figures S3 and  
144 S4), thus reducing the impact of other factors, such as positive selection (Figure S5)  
145 and sequencing error, on FitCoal analysis.

146

### 147 **Demographic Inference of African Populations**

148 To infer the demographic histories of African populations, seven African  
149 populations in the 1000 Genomes Project (1000GP) (Altshuler et al., 2015) were  
150 analyzed by FitCoal. Only non-coding regions, defined by GENCODE (Frankish et al.,  
151 2019), were used in order to avoid the effect of purifying selection. To avoid the  
152 potential effect of positive selection (Fay and Wu, 2000), high-frequency mutations  
153 were excluded from the analysis.

154 Results showed that all seven African populations passed through a super  
155 bottleneck around 914 (854–1,003) kyr ago and that this bottleneck was relieved  
156 about 793 (772–815) kyr ago (Figures 3A-C and S6; Table S2). The average effective  
157 population size of African populations during the bottleneck period was determined to  
158 be 1,270 (770–2,030). Although traces of the bottleneck were observed in previous  
159 studies, the bottleneck was ignored because its signatures were too weak to be noticed  
160 (Altshuler et al., 2015; Bergstrom et al., 2020; Li and Durbin, 2011; Schiffels and  
161 Durbin, 2014; Terhorst et al., 2017). After the bottleneck was relieved, the population  
162 size was increased to 27,080 (25,300–29,180), a 20-fold increase, around 800 kyr ago.  
163 This population size remained relatively constant until the recent expansion.

164 To avoid the potential effects of low sequencing depth (~ 5x) of non-coding  
165 regions in the 1000GP on the analysis, the autosomal non-coding genomic  
166 polymorphism of Human Genome Diversity Project – Centre d’Etude du  
167 Polymorphisme Humain panel (HGDP-CEPH) with high sequencing coverage (~35x)  
168 was analyzed (Bergstrom et al., 2020). Populations with more than 15 individuals  
169 each were examined. Results showed that the super bottleneck occurred on all three  
170 African populations in HGDP-CEPH between 1,257 (1,042–1,527) and 859 (856–864)

171 kyr ago (Figures 3D-F and S7; Table S3), and the average population size during the  
172 bottleneck period was 1,300 (908–1,670). This number was very similar to that (1,270)  
173 estimated from the data of 1000GP.

174 After the bottleneck was relieved, the population sizes of the two HGDP-CEPH  
175 agriculturalist populations were increased to 27,300 and 27,570 (Figures 3E and S7;  
176 Table S3), consistent with the 1000GP estimate of 27,280. The Biaka, a  
177 hunter-gatherer population, had a larger population size of 35,330, suggesting a deep  
178 divergence between this and other agriculturalist populations (Hsieh et al., 2016;  
179 Schlebusch and Jakobsson, 2018; Skoglund et al., 2017). The Biaka population was  
180 found to have a recent population decline (Figures 3D and S7), as previously observed  
181 (Bergstrom et al., 2020). These results suggest that hunter-gatherer populations were  
182 widely spread and decreased when agriculturalist populations were expanded.

183 To provide a precise inference of the super bottleneck, the results from the two  
184 data sets were combined. After analyzing the inferred time of instantaneous change of  
185 10 populations, the super bottleneck was inferred to last for about 117,000 years, from  
186 930 (854–1,042; s.e.m.: 23.52) to 813 (772–864; s.e.m.: 11.02) kyr ago. The effective  
187 size during the bottleneck period was precisely determined to be 1,280 (767–2,031;  
188 s.e.m.: 131). A loss of 65.85% in current genetic diversity of human populations was  
189 estimated because of the bottleneck.

190

### 191 **Demographic Inference of Non-African Populations**

192 No super bottleneck was directly observed on all 19 non-African populations in  
193 1000GP (Figures 3A-C and S6; Table S4). The ancestral population size of these  
194 populations was determined to be 20,260 (18,850–22,220), similar to that determined  
195 in previous studies (Bergstrom et al., 2020; Li and Durbin, 2011; Schiffels and Durbin,  
196 2014; Terhorst et al., 2017). The population size of 1000GP non-African populations  
197 started to decline around 368 (175–756) kyr ago, suggesting that African and  
198 non-African divergence occurred much earlier than the out-of-Africa migration  
199 (Altshuler et al., 2015; Bergstrom et al., 2020; Li and Durbin, 2011; Nielsen et al.,  
200 2017; Schiffels and Durbin, 2014; Terhorst et al., 2017). European and South Asian  
201 populations were found to have a relatively weaker out-of-Africa bottleneck than East  
202 Asian populations, and the bottleneck severity was found to correlate with their  
203 geographic distance to Africa, consistent with the observed correlation between

204 heterozygosity and geographic distance (Prugnolle et al., 2005; Ramachandran et al.,  
205 2005). A weak bottleneck was observed on American populations, probably because  
206 of recent admixture (Altshuler et al., 2015). All 1000GP non-African populations  
207 were found to increase in size recently.

208 The super bottleneck was also not directly detected in all 21 HGDP-CEPH  
209 non-African populations (Figures 3D-F and S7; Table S5). The ancestral population  
210 size of these populations was determined to be 20,030 (19,060–21,850), very similar  
211 to that (20,260) estimated from 1000GP. These populations started to decline 367  
212 (167–628) kyr ago. A positive correlation was also observed between the severity of  
213 out-of-Africa bottleneck and their geographic distance to Africa. The Middle East  
214 populations had the weakest bottleneck, while the Maya, an American population, had  
215 the strongest bottleneck. Similar to 1000GP non-African populations, most  
216 HGDP-CEPH non-African populations were found to increase in size recently, except  
217 an isolated Kalash population, consistent with previous studies (Ayub et al., 2015;  
218 Bergstrom et al., 2020).

219

### 220 **Super Bottleneck in the Early Middle Pleistocene**

221 The super bottleneck was directly inferred on all 10 African populations, but not  
222 on all 40 non-African populations. To investigate this observation, simulations were  
223 performed with three 1000GP demographic models, designated Bottleneck I, II, and  
224 III (Figure 4). Bottleneck I simulated the average inferred demographic history of  
225 African populations with the super bottleneck, and Bottleneck II and III simulated the  
226 demography of non-African populations without and with the super bottleneck. Both  
227 Bottleneck I and II were inferred correctly in all simulated data sets (Table S6).  
228 However, no super bottleneck was detected in Bottleneck III simulations. The super  
229 bottleneck was found to cause a population size gap between the true model and  
230 inferred demographic history after the bottleneck was relieved, suggesting a hidden  
231 effect of the super bottleneck on non-African populations. Simulations were then  
232 extended to HGDP-CEHP populations with Bottleneck models IV–VI, and similar  
233 results were obtained (Figure S8; Table S7). When simulations were performed on  
234 three artificial models (Bottleneck VII–IX) with various demographic parameters, the  
235 population size gap was still detected (Figure S9; Table S8). These results suggest a  
236 hidden effect of the super bottleneck on non-African populations.



237 The population size gap was found in both 1000GP and HGDP-CEPH data sets  
238 (Figure 3A, D). After the bottleneck was relieved, the average population sizes of  
239 non-African populations were determined to be 20,260 and 20,030, respectively,  
240 while those of African agriculturalist populations were 27,080 and 27,440,  
241 respectively in these two data sets. The observed population size gap was 7,020,  
242 probably due to the hidden effect of the super bottleneck on non-African populations.

243 The reasons were then investigated why the super bottleneck had different effects  
244 on African and non-African populations. Results showed that non-African populations  
245 had the out-of-Africa bottleneck, but African populations lacked such bottleneck.  
246 Therefore, the standard coalescent time of non-African populations was larger than  
247 that of African populations (Figure 3C, F). As African populations had more  
248 coalescent events occurred during the bottleneck period, the bottleneck was more  
249 readily inferred. The mathematical proof on this issue was described in the STAR★  
250 METHODS.

251

## 252 **DISCUSSION**

253 In this study, we develop FitCoal, a novel model-flexible method for  
254 demographic inference. One key characteristic feature of FitCoal is that the analytical  
255 result of expected branch length is obtained for each SFS type under arbitrary  
256 demographic models. This enables us to calculate precisely the likelihood. Second,  
257 the tabulated FitCoal is used to calculate rapidly the likelihood, making FitCoal  
258 economical of inference time. Third, the confounding effects of sequencing error and  
259 positive selection can be easily avoided by discarding rare and high-frequency  
260 mutations without losing inference accuracy. Fourth, exponential change is allowed  
261 within each inference time interval which represents a long-term continuous  
262 population change. This feature provides a better approximation to the demographic  
263 history of real populations while PSMC (Li and Durbin, 2011) and stairway plot (Liu  
264 and Fu, 2015) need multiple instantaneous changes to fit an exponential change. Last  
265 but not least, inference time intervals are variable during the demographic inference,  
266 leading to a better inference of ancient demographic events. Since coalescent events  
267 become rare when tracing backward in time, the length of time interval is usually set  
268 to increase progressively (Li and Durbin, 2011; Liu and Fu, 2015; Schiffels and  
269 Durbin, 2014; Terhorst et al., 2017). Although this strategy can capture recent

270 demographic events, it may miss ancient ones. Therefore, FitCoal can make a fast and  
271 accurate inference for recent and ancient demographic events.

272 The most important discovery with FitCoal in this study is that human ancestors  
273 passed through a super bottleneck during the Mid-Pleistocene. Strikingly, the super  
274 bottleneck is inferred on all the 10 African populations while only a hidden effect of  
275 the super bottleneck is detected on all the 40 non-African populations. This  
276 observation is not only explained by the coalescent theory (see the section above) but  
277 also exclude the possibility that the super bottleneck is falsely inferred due to positive  
278 selection, population structure, sequencing error, and other confounding factors. If the  
279 inferred demographic histories of non-African populations are affected by those  
280 confounding factors, the super bottleneck should be falsely inferred on non-African  
281 populations. Moreover, large-scale simulations demonstrate that FitCoal did not  
282 falsely infer a bottleneck due to the existence of positive selection (Figure S5) and  
283 population structure (Figures S35 and S36) in African populations. Therefore, the  
284 super bottleneck exists during the Mid-Pleistocene and is shared by African and  
285 non-African populations.

286 The ancient population size reduction around 930 kyr ago was likely to be driven  
287 by the climatic changes at the transition between the Early and Middle Pleistocene  
288 (Lisiecki and Raymo, 2005). During the transition, low-amplitude 41 kyr  
289 obliquity-dominated glacial cycles shifted to quasi-periodic, low frequency 100 kyr  
290 periodicity, and climate change became more extreme and unpredictably associated  
291 with a longer dry period in Africa and a large faunal turnover in Africa and Eurasia  
292 (Head et al., 2008). Coinciding with this date, archaic humans referable to African  
293 *Homo erectus* became extinct. Subsequently, from about 900 until 600 kyr ago, there  
294 is a gap in the human fossil record in Africa (Figure S10) (Profico et al., 2016). Only  
295 few fossil specimens have been found in this time span, such as the cranial fragments  
296 from Gombore in Ethiopia and the mandibles from Tighenif in Algeria, all of which  
297 show features linked to later *H. heidelbergensis* representatives and represent the  
298 evolutionary origin of this species (Stringer, 2016). As a matter of fact, our data  
299 suggest that the ancestors of modern humans had a very small effective size of

300 approximately 1,280 breeding individuals during the bottleneck period. This number  
301 is comparable in the same magnitude in the effective size of mammals threatened by  
302 extinction (Li et al., 2016).

303 A rapid population recovery was inferred on all 10 African populations with a  
304 20-fold population growth during a short time period around 813 kyr ago. The earliest  
305 archaeological evidence for human control of fire was found in Israel 790 kyr ago  
306 (Goren-Inbar et al., 2004). As the control of fire profoundly affected social evolution  
307 (Foley and Gamble, 2009) and brain size (Melchionna et al., 2020), it may be  
308 associated with the big bang in population size at the end of the super bottleneck.  
309 However, climatic changes, as the alternative hypothesis, cannot be ruled out. Thus,  
310 the driving force of the rapid population recovery needs to be further studied.

311 The super bottleneck, which started about one million years ago, might represent  
312 a speciation event at the origin of *H. heidelbergensis* and should be strongly related to  
313 the gap in the African human fossil record. The questions about where the small  
314 ancient population dwelt, and how they survived for such a long time, remain to be  
315 investigated. Our findings may also shed light on a debate about the divergence time  
316 between Neanderthals/Denisovans and modern humans (between 440 and 270 *vs*  
317 1,007 kyr ago) (Green et al., 2010; Ni et al., 2021; Reich et al., 2010; Shao et al.,  
318 2021). The two estimates can be verified by detecting whether ancestors of  
319 Neanderthals/Denisovans passed through the super bottleneck. In the future, a more  
320 detailed picture of human evolution during the Pleistocene may be revealed because  
321 more genomic sequences of present populations and those of archaic hominins as well  
322 as more advanced population genomics methods will be available.

323

## 324 **ACKNOWLEDGMENTS**

325 We thank Daniel Zivković for sharing his codes to calculate the expected branch  
326 length, and Xiaoming Liu for sharing his simulated results. This work was supported  
327 by grants from the Strategic Priority Research Program of the Chinese Academy of  
328 Sciences (XDB13040800), the National Natural Science Foundation of China (nos.  
329 31100273, 31172073, 91131010), and National Key Research and Development  
330 Project (No. 2020YFC0847000).

331

## 332 **AUTHOR CONTRIBUTIONS**

333 W.H., Z.H., Y.H.P., and H.L. conceived and designed the research; W.H., Z.H., and  
334 H.L. wrote the code; W.H., Z.H., P.D., F.D.V., G.M., and Y.H.P. analyzed the data;  
335 W.H., Z.H., P.D., F.D.V., G.M., Y.H.P., and H.L. wrote the paper.

336

337 **DECLARATION OF INTERESTS**

338 The authors declare no competing interests.

339 **REFERENCES**

- 340 Altshuler, D.M., Durbin, R.M., Abecasis, G.R., Bentley, D.R., Chakravarti, A., Clark,  
341 A.G., Donnelly, P., Eichler, E.E., Flicek, P., Gabriel, S.B., *et al.* (2015). A global  
342 reference for human genetic variation. *Nature* 526, 68-74.
- 343 Ayub, Q., Mezzavilla, M., Pagani, L., Haber, M., Mohyuddin, A., Khaliq, S., Mehdi,  
344 S.Q., and Tyler-Smith, C. (2015). The Kalash genetic isolate: ancient divergence,  
345 drift, and selection. *Am. J. Hum. Genet.* 96, 775-783.
- 346 Beerli, P. (2004). Effect of unsampled populations on the estimation of population  
347 sizes and migration rates between sampled populations. *Mol. Ecol.* 13, 827-836.
- 348 Bergstrom, A., McCarthy, S.A., Hui, R.Y., Almarri, M.A., Ayub, Q., Danecek, P.,  
349 Chen, Y., Felkel, S., Hallast, P., Kamm, J., *et al.* (2020). Insights into human  
350 genetic variation and population history from 929 diverse genomes. *Science* 367,  
351 eaay5012.
- 352 Bhaskar, A., and Song, Y.S. (2014). Descartes' rule of signs and the identifiability of  
353 population demographic models from genomic variation data. *Ann. Stat.* 42,  
354 2469-2493.
- 355 Campbell, C.D., Chong, J.X., Malig, M., Ko, A., Dumont, B.L., Han, L., Vives, L.,  
356 O'Roak, B.J., Sudmant, P.H., Shendure, J., *et al.* (2012). Estimating the human  
357 mutation rate using autozygosity in a founder population. *Nat. Genet.* 44,  
358 1277-1281.
- 359 Chen, G.K., Marjoram, P., and Wall, J.D. (2009). Fast and flexible simulation of DNA  
360 sequence data. *Genome Res.* 19, 136-142.
- 361 Chen, H. (2019). A computational approach for modeling the allele frequency  
362 spectrum of populations with arbitrarily varying size. *Genomics Proteomics  
363 Bioinf.* 17, 635-644.
- 364 Conrad, D.F., Keebler, J.E.M., DePristo, M.A., Lindsay, S.J., Zhang, Y.J., Casals, F.,  
365 Idaghdour, Y., Hartl, C.L., Torroja, C., Garimella, K.V., *et al.* (2011). Variation in  
366 genome-wide mutation rates within and between human families. *Nat. Genet.* 43,  
367 712-714.
- 368 Durvasula, A., and Sankararaman, S. (2020). Recovering signals of ghost archaic  
369 introgression in African populations. *Sci. Adv.* 6, eaax5097.
- 370 Excoffier, L., Dupanloup, I., Huerta-Sanchez, E., Sousa, V.C., and Foll, M. (2013).  
371 Robust demographic inference from genomic and SNP data. *PLoS Genet.* 9,  
372 e1003905.
- 373 Fay, J.C., and Wu, C.-I. (2000). Hitchhiking under positive Darwinian selection.  
374 *Genetics* 155, 1405-1413.
- 375 Foley, R., and Gamble, C. (2009). The ecology of social transitions in human  
376 evolution. *Philos. Trans. R. Soc. Lond., Ser. B: Biol. Sci.* 364, 3267-3279.
- 377 Frankish, A., Diekhans, M., Ferreira, A.M., Johnson, R., Jungreis, I., Loveland, J.,  
378 Mudge, J.M., Sisu, C., Wright, J., Armstrong, J., *et al.* (2019). GENCODE  
379 reference annotation for the human and mouse genomes. *Nucleic Acids Res.* 47,  
380 D766-D773.
- 381 Fu, Y.X. (1995). Statistical properties of segregating sites. *Theor. Popul. Biol.* 48,  
382 172-197.

- 383 Fu, Y.X., and Li, W.H. (1993). Statistical tests of neutrality of mutations. *Genetics* *133*,  
384 693-709.
- 385 Goren-Inbar, N., Alpers, N., Kislev, M.E., Simchoni, O., Melamed, Y., Ben-Nun, A.,  
386 and Werker, E. (2004). Evidence of hominin control of fire at Gesher Benot  
387 Ya'aqov, Israel. *Science* *304*, 725-727.
- 388 Green, R.E., Krause, J., Briggs, A.W., Maricic, T., Stenzel, U., Kircher, M., Patterson,  
389 N., Li, H., Zhai, W., Fritz, M.H.-Y., *et al.* (2010). A draft sequence of the  
390 Neandertal genome. *Science* *328*, 710-722.
- 391 Griffiths, R.C., and Tavaré S. (1996). Monte Carlo inference methods in population  
392 genetics. *Math. Comput. Modell.* *23*, 141-158.
- 393 Gutenkunst, R.N., Hernandez, R.D., Williamson, S.H., and Bustamante, C.D. (2009).  
394 Inferring the joint demographic history of multiple populations from  
395 multidimensional SNP frequency data. *PLoS Genet.* *5*, e1000695.
- 396 Harpending, H.C., Batzer, M.A., Gurven, M., Jorde, L.B., Rogers, A.R., and Sherry,  
397 S.T. (1998). Genetic traces of ancient demography. *Proc. Natl. Acad. Sci. USA* *95*,  
398 1961-1967.
- 399 Head, M.J., Pillans, B., and Farquhar, S.A. (2008). The Early-Middle Pleistocene  
400 transition: characterization and proposed guide for the defining boundary.  
401 *Episodes* *31*, 255.
- 402 Hsieh, P., Woerner, A.E., Wall, J.D., Lachance, J., Tishkoff, S.A., Gutenkunst, R.N.,  
403 and Hammer, M.F. (2016). Model-based analyses of whole-genome data reveal a  
404 complex evolutionary history involving archaic introgression in Central African  
405 Pygmies. *Genome Res.* *26*, 291-300.
- 406 Hudson, R.R. (2001). Two-locus sampling distributions and their application.  
407 *Genetics* *159*, 1805-1817.
- 408 Hudson, R.R. (2002). Generating samples under a Wright-Fisher neutral model of  
409 genetic variation. *Bioinformatics* *18*, 337-338.
- 410 Jouganous, J., Long, W., Ragsdale, A.P., and Gravel, S. (2017). Inferring the joint  
411 demographic history of multiple populations: beyond the diffusion approximation.  
412 *Genetics* *206*, 1549-1567.
- 413 Kim, Y., and Stephan, W. (2002). Detecting a local signature of genetic hitchhiking  
414 along a recombining chromosome. *Genetics* *160*, 765-777.
- 415 Kong, A., Frigge, M.L., Masson, G., Besenbacher, S., Sulem, P., Magnusson, G.,  
416 Gudjonsson, S.A., Sigurdsson, A., Jonasdottir, A., Jonasdottir, A., *et al.* (2012).  
417 Rate of de novo mutations and the importance of father's age to disease risk.  
418 *Nature* *488*, 471-475.
- 419 Li, H., and Durbin, R. (2011). Inference of human population history from individual  
420 whole-genome sequences. *Nature* *475*, 493-496.
- 421 Li, H., and Stephan, W. (2006). Inferring the demographic history and rate of adaptive  
422 substitution in *Drosophila*. *PLoS Genet.* *2*, e166.
- 423 Li, H., Xiang-Yu, J., Dai, G., Gu, Z., Ming, C., Yang, Z., Ryder, O.A., Li, W.H., Fu,  
424 Y.X., and Zhang, Y.P. (2016). Large numbers of vertebrates began rapid  
425 population decline in the late 19th century. *Proc. Natl. Acad. Sci. USA* *113*,  
426 14079-14084.

- 427 Lisiecki, L.E., and Raymo, M.E. (2005). A Pliocene-Pleistocene stack of 57 globally  
428 distributed benthic  $\delta^{18}\text{O}$  records. *Paleoceanography* 20, PA1003.
- 429 Liu, X., and Fu, Y.X. (2020). Stairway Plot 2: demographic history inference with  
430 folded SNP frequency spectra. *Genome Biol.* 21, 280.
- 431 Liu, X.M., and Fu, Y.X. (2015). Exploring population size changes using SNP  
432 frequency spectra. *Nat. Genet.* 47, 555-559.
- 433 Lopez, M., Kousathanas, A., Quach, H., Harmant, C., Mouguiama-Daouda, P.,  
434 Hombert, J.M., Froment, A., Perry, G.H., Barreiro, L.B., Verdu, P., *et al.* (2018).  
435 The demographic history and mutational load of African hunter-gatherers and  
436 farmers. *Nat. Ecol. Evol.* 2, 721-730.
- 437 Manica, A., Amos, W., Balloux, F., and Hanihara, T. (2007). The effect of ancient  
438 population bottlenecks on human phenotypic variation. *Nature* 448, 346-348.
- 439 Melchionna, M., Profico, A., Castiglione, S., Sansalone, G., Serio, C., Mondanaro, A.,  
440 Di Febbraro, M., Rook, L., Pandolfi, L., and Di Vincenzo, F. (2020). From smart  
441 apes to human brain boxes. A uniquely derived brain shape in late hominins clade.  
442 *Front. Earth Sci.* 8, 273.
- 443 Myers, S., Fefferman, C., and Patterson, N. (2008). Can one learn history from the  
444 allelic spectrum? *Theor. Popul. Biol.* 73, 342-348.
- 445 Ni, X.J., Ji, Q., Wu, W.S., Shao, Q.F., Ji, Y.N., Zhang, C., Liang, L., Ge, J.Y., Guo, Z.,  
446 Li, J.H., *et al.* (2021). Massive cranium from Harbin in northeastern China  
447 establishes a new Middle Pleistocene human lineage. *The Innovation* 100130.
- 448 Nielsen, R., Akey, J.M., Jakobsson, M., Pritchard, J.K., Tishkoff, S., and Willerslev, E.  
449 (2017). Tracing the peopling of the world through genomics. *Nature* 541,  
450 302-310.
- 451 Pedersen, M.E.H. (2010). Tuning and simplifying heuristical optimization. PhD thesis,  
452 Univ. Southampton.
- 453 Polanski, A., Bobrowski, A., and Kimmel, M. (2003). A note on distributions of times  
454 to coalescence, under time-dependent population size. *Theor. Popul. Biol.* 63,  
455 33-40.
- 456 Profico, A., Di Vincenzo, F., Gagliardi, L., Piperno, M., and Manzi, G. (2016). Filling  
457 the gap. Human cranial remains from Gombore II (Melka Kunture, Ethiopia; ca.  
458 850 ka) and the origin of *Homo heidelbergensis*. *J. Anthropol. Sci.* 94, 41-63.
- 459 Prugnolle, F., Manica, A., and Balloux, F. (2005). Geography predicts neutral genetic  
460 diversity of human populations. *Curr. Biol.* 15, R159-160.
- 461 Ramachandran, S., Deshpande, O., Roseman, C.C., Rosenberg, N.A., Feldman, M.W.,  
462 and Cavalli-Sforza, L.L. (2005). Support from the relationship of genetic and  
463 geographic distance in human populations for a serial founder effect originating  
464 in Africa. *Proc. Natl. Acad. Sci. USA* 102, 15942-15947.
- 465 Reich, D., Green, R.E., Kircher, M., Krause, J., Patterson, N., Durand, E.Y., Viola, B.,  
466 Briggs, A.W., Stenzel, U., Johnson, P.L.F., *et al.* (2010). Genetic history of an  
467 archaic hominin group from Denisova Cave in Siberia. *Nature* 468, 1053-1060.
- 468 Scally, A., and Durbin, R. (2012). Revising the human mutation rate: implications for  
469 understanding human evolution. *Nat. Rev. Genet.* 13, 745-753.
- 470 Schiffels, S., and Durbin, R. (2014). Inferring human population size and separation

- 471 history from multiple genome sequences. *Nat. Genet.* *46*, 919-925.
- 472 Schlebusch, C.M., and Jakobsson, M. (2018). Tales of human migration, admixture,  
473 and selection in Africa. *Annu. Rev. Genomics Hum. Genet.* *19*, 405-428.
- 474 Shao, Q.F., Ge, J.Y., Ji, Q., Li, J.H., Wu, W.S., Ji, Y.N., Zhan, T., Zhang, C., Li, Q.,  
475 Grün, R., *et al.* (2021). Geochemical provenancing and direct dating of the  
476 Harbin archaic human cranium. *The Innovation* *100131*.
- 477 Skoglund, P., Thompson, J.C., Prendergast, M.E., Mitnik, A., Sirak, K., Hajdinjak,  
478 M., Salie, T., Rohland, N., Mallick, S., Peltzer, A., *et al.* (2017). Reconstructing  
479 prehistoric African population structure. *Cell* *171*, 59-71.
- 480 Stoneking, M., and Krause, J. (2011). Learning about human population history from  
481 ancient and modern genomes. *Nat. Rev. Genet.* *12*, 603-614.
- 482 Stringer, C. (2016). The origin and evolution of *Homo sapiens*. *Philos. Trans. R. Soc.*  
483 *Lond., Ser. B: Biol. Sci.* *371*, 20150237.
- 484 Tajima, F. (1989). Statistical method for testing the neutral mutation hypothesis by  
485 DNA polymorphism. *Genetics* *123*, 585-595.
- 486 Terhorst, J., Kamm, J.A., and Song, Y.S. (2017). Robust and scalable inference of  
487 population history from hundreds of unphased whole genomes. *Nat. Genet.* *49*,  
488 303-309.
- 489 White, T.D., Asfaw, B., DeGusta, D., Gilbert, H., Richards, G.D., Suwa, G., and  
490 Howell, F.C. (2003). Pleistocene *Homo sapiens* from Middle Awash, Ethiopia.  
491 *Nature* *423*, 742-747.
- 492 Yu, D., Dong, L., Yan, F., Mu, H., Tang, B., Yang, X., Zeng, T., Zhou, Q., Gao, F.,  
493 Wang, Z., *et al.* (2019). eGPS 1.0: comprehensive software for multi-omic and  
494 evolutionary analyses. *Natl. Sci. Rev.* *6*, 867-869.
- 495 Zivković, D., and Wiehe, T. (2008). Second-order moments of segregating sites under  
496 variable population size. *Genetics* *180*, 341-357.
- 497



498 **STAR★METHODS**

499

500 **KEY RESOURCES TABLE**

| REAGENT or RESOURCE                                                                       | SOURCE               | IDENTIFIER                                                                                                                                                                                                                                                                           |
|-------------------------------------------------------------------------------------------|----------------------|--------------------------------------------------------------------------------------------------------------------------------------------------------------------------------------------------------------------------------------------------------------------------------------|
| Deposited data                                                                            |                      |                                                                                                                                                                                                                                                                                      |
| 1000 Genomes project data, phase 3                                                        | 1000 Genomes project | <a href="http://ftp.1000genomes.ebi.ac.uk/vol1/ftp/release/20130502/">http://ftp.1000genomes.ebi.ac.uk/vol1/ftp/release/20130502/</a>                                                                                                                                                |
| Human Genome Diversity Project – Centre d’Etude du Polymorphisme Humain (HGDP-CEPH) panel | HGDP and CEPH        | <a href="ftp://ngs.sanger.ac.uk/production/hgdp">ftp://ngs.sanger.ac.uk/production/hgdp</a>                                                                                                                                                                                          |
| Observed SFSs and raw data to prepare Figures                                             | This study           | <a href="https://data.mendeley.com/datasets/xmf5r8nznr/draft?a=8e2a5abe-de47-4ab7-a313-e2e5526cbc55">https://data.mendeley.com/datasets/xmf5r8nznr/draft?a=8e2a5abe-de47-4ab7-a313-e2e5526cbc55</a>                                                                                  |
| Software and algorithms                                                                   |                      |                                                                                                                                                                                                                                                                                      |
| FitCoal                                                                                   | This study           | <a href="https://www.picb.ac.cn/evolgen/">https://www.picb.ac.cn/evolgen/</a> ,<br><a href="https://zenodo.org/record/4805461#.YNl61Ey-vuo">https://zenodo.org/record/4805461#</a> .<br>YNl61Ey-vuo and<br><a href="http://www.egps-software.net/">http://www.egps-software.net/</a> |

501

502 **CONTACT FOR REAGENT AND RESOURCE SHARING**

503 Further information and requests for resource and reagents should be directed to and  
504 will be fulfilled by the Lead Contact, Haipeng Li ([lihaipeng@picb.ac.cn](mailto:lihaipeng@picb.ac.cn)).

505

506 **METHOD DETAILS**

507 **Standard coalescent time and time in generations**

508 The population size is denoted  $N(\cdot)$ , representing the demographic history.

509 Time  $\tau$  represents one-point scaled time since the time in a generation is scaled by

510  $2N(0)$ . Time  $t$  is usually scaled by  $2N(t)$  generations (Bhaskar and Song, 2014;

511 Chen, 2019; Fu, 1995; Myers et al., 2008). To distinguish it from the one-point scaled

512 time  $\tau$ , time  $t$  is designated as the standard coalescent time.

513

514 **Fast infinitesimal time coalescent (FitCoal) process**

515 The FitCoal calculates the expected branch length for each type of site frequency  
 516 spectrum (SFS) under arbitrary demographic history  $N(\cdot)$ . We assume that a sample  
 517 is obtained by randomly taken  $n$  sequences from the population. The sample is  
 518 designated to be state  $l$  ( $l = 2, \dots, n$ ) at time  $t$  if it has exactly  $l$  ancestral lineages  
 519 at this time. The probability of state  $l$  at time  $t$  is denoted  $p_l(t)$ . In a coalescent  
 520 tree, a branch is designated to be type  $i$  if it has exactly  $i$  descendants. We have

$$521 \quad \frac{d}{dt} p_l(t) = \begin{cases} \binom{l+1}{2} p_{l+1}(t) - \binom{l}{2} p_l(t) & l = 2, \dots, n-1 \\ -\binom{l}{2} p_l(t) & l = n \end{cases}.$$

522 When  $\Delta t$  is extremely small (Figure 1), there is at most one coalescent event during  
 523  $t$  and  $t + \Delta t$ , leading to

$$524 \quad p_l(t + \Delta t) = \begin{cases} \binom{l+1}{2} \Delta t p_{l+1}(t) + (1 - \binom{l}{2} \Delta t) p_l(t) & l = 2, \dots, n-1 \\ (1 - \binom{l}{2} \Delta t) p_l(t) & l = n \end{cases}.$$

525 The branch length is in units of generations. The expected branch length of state  
 526  $l$  during  $t$  and  $t + \Delta t$  is calculated as  $\int_t^{t+\Delta t} 2 N(t) p_l(t) l dt$ . The probability that a  
 527 branch of state  $l$  is of type  $i$  is  $\frac{\binom{n-i-1}{l-2}}{\binom{n-1}{l-1}}$  (Fu, 1995). The expected branch length of  
 528 type  $i$  of state  $l$  during  $t$  and  $t + \Delta t$  is  $\int_t^{t+\Delta t} 2 N(t) p_l(t) l \frac{\binom{n-i-1}{l-2}}{\binom{n-1}{l-1}} dt$ . Therefore,  
 529 the expected branch length  $BL_i(N(\cdot))$  of type  $i$  is

$$530 \quad \sum_{l=2}^{n-i+1} \int_0^\infty 2 N(t) p_l(t) l dt \frac{\binom{n-i-1}{l-2}}{\binom{n-1}{l-1}}.$$

531 A FitCoal time partition is denoted by  $\{t_0, t_1, \dots, t_m\}$ , where  $0 = t_0 < t_1 <$   
 532  $\dots < t_m$ . We have  $p_l(t_0) = \begin{cases} 1 & l = n \\ 0 & \text{else} \end{cases}$ . For a large positive number  $m$ , if  $t_m$  is  
 533 large and  $(t_k - t_{k-1})$  is small for  $k = 1, \dots, m$ , then

$$534 \quad p_l(t_k) = \begin{cases} (1 - \binom{l}{2} (t_k - t_{k-1})) p_l(t_{k-1}) & l = n \\ (1 - \binom{l}{2} (t_k - t_{k-1})) p_l(t_{k-1}) + \binom{l+1}{2} (t_k - t_{k-1}) p_{l+1}(t_{k-1}) & \text{else} \end{cases},$$

535 where  $k = 1, \dots, m$ .

536 The expected branch length of type  $i$  is calculated as

$$537 \quad BL_i(N(\cdot)) = \sum_{l=2}^{n-i+1} l \frac{\binom{n-i-1}{l-2}}{\binom{n-1}{l-1}} \left( \sum_{k=1}^m 2 N(t_{k-1}) p_l(t_{k-1}) (t_k - t_{k-1}) \right).$$

538 To determine the time partition, we required that the coalescent probability was  
 539 less than  $10^{-4}$  during  $t_{k-1}$  and  $t_k$  ( $k = 1, \dots, m$ ), the probability of common

540 ancestor (*i.e.*, the probability of state 1) at  $t_m$  was larger than  $(1 - 10^{-6})$ . When the  
 541 sample size was 10, the number of infinitesimal time intervals was 1,571,200. When  
 542 the sample size was 200, the number of infinitesimal time intervals was 7,038,398.  
 543 Thus, each  $\Delta t$  was extremely small for precise calculation of expected branch length,  
 544 and the time was partitioned to obtain  $p_i(t)$  in order to calculate the expected branch  
 545 length of type  $i$ .

546

### 547 **Tabulated FitCoal**

548 The expected branch length of each type can be calculated for arbitrary time  
 549 intervals according to the procedure described above. Considering another tabulated  
 550 time partition  $\{t_0, t_1, \dots, t_m\}$  ( $0 = t_0 < t_1 < \dots < t_m$ ), the expected branch length of  
 551 a type is equal to the sum of the expected branch length of this type during each  
 552 tabulated time interval, thus the latter can be rescaled and tabulated.

553 The scaled expected branch length  $BL_{i,t}$  of type  $i$  during 0 and  $t$  is

554 
$$BL_{i,t} = \sum_{l=2}^{n-i+1} \int_0^t p_s(l) l \frac{\binom{n-i-1}{l-2}}{\binom{n-1}{l-1}} ds$$
, where  $i = 1, \dots, n - 1$ . For the tabulated time

555 partition  $\{t_0, t_1, \dots, t_m\}$ ,  $BL_{i,t_0}$ ,  $BL_{i,t_1}$ ,  $\dots$ , and  $BL_{i,t_m}$  are tabulated. When  $n = 10$ ,  
 556  $m = 231$ . When  $n = 200$ ,  $m = 529$ .

557  $BL_{i,t}$  is used to calculate the expected branch lengths under arbitrary  
 558 demographic histories. When  $\tilde{t} \in [t_{k-1}, t_k)$ ,

559 
$$BL_{i,\tilde{t}} \approx \frac{t_k - \tilde{t}}{t_k - t_{k-1}} BL_{i,t_{k-1}} + \frac{\tilde{t} - t_{k-1}}{t_k - t_{k-1}} BL_{i,t_k}.$$

560 If  $N(t)$  is a piecewise constant, that is, there exists a demographic time partition  
 561  $\{\tilde{t}_0, \tilde{t}_1, \dots, \tilde{t}_{\tilde{m}}\}$ , such that  $N(t) = N_k$  for  $t \in [\tilde{t}_k, \tilde{t}_{k+1})$ ,  $k = 0, \dots, \tilde{m}$ . Then, the  
 562 expected branch length of type  $i$  is calculated as

563 
$$BL_i(N(\cdot)) = \sum_{k=1}^{\tilde{m}} 2N_k (BL_{i,\tilde{t}_k} - BL_{i,\tilde{t}_{k-1}}).$$

564 When  $N(t)$  is complex, the population size can be approximated by a piecewise  
 565 constant function.

566

### 567 **Composite likelihood**

568 The mutation rate per base pair per generation is denoted  $\mu$ , and  $\vec{\xi} = (\xi_i)$  is the  
 569 observed number of SNPs of  $n$  sequences with  $\sigma$  base pairs, where  $i = 1, \dots, n - 1$ .

570 The expected SFS is  $\vec{\lambda} = (\lambda_i)$ , where  $\lambda_i = \mu\sigma BL_i(N(\cdot))$ . Following the Poisson

571 probability and previous studies (Li and Stephan, 2006), the composite likelihood is  
 572 calculated as follows:

$$573 \quad L_{\mu,t}(\vec{\xi}, N(\cdot)) = \prod_{i=1}^{n-1} \frac{\lambda_i^{\xi_i} e^{-\lambda_i}}{\xi_i!}.$$

574 The likelihood is extended to missing data and truncated SFS (see Supplemental  
 575 Text).

576

### 577 **Demographic inference**

578 The number of demographic time intervals is variable. FitCoal first fits the  
 579 observed SFS using a constant size model with one demographic time interval, and  
 580 the number of time intervals is increased by one at a time to generate more complex  
 581 models. The Local Unimodal Sampling (LUS) algorithm (Pedersen, 2010) is used to  
 582 maximize the likelihood and estimate demographic parameters. A log-likelihood  
 583 promotion rate is used to determine the best model to explain the observed SFS, and  
 584 20% is used as the threshold.

585 A series of demography with  $m$  pieces is denoted by a set  $S(m)$ , where  $S(m)$   
 586 contains all of the following  $m$  pieces of population size:

$$587 \quad N(t|N_0 > 0, N_{(m)}, t_{(m)}, c_{(m)}) = \begin{cases} N_m N_0 & t \geq t_m \\ N_k N_0 & t_k \leq t < t_{k+1}, c_k \in \mathcal{C}, k = 1, \dots, m-1, \\ \frac{(t_{k+1}-t_k)N_{k+1}N_k N_0}{(t-t_k)N_k + (t_{k+1}-t)N_{k+1}} & t_k \leq t < t_{k+1}, c_k \in \mathcal{E}, k = 1, \dots, m-1 \end{cases}$$

588 where  $N_{(m)} = (N_1, \dots, N_m) \in N[m]$ ,  $t_{(m)} = (t_1, \dots, t_m) \in t[m]$ ,

589  $c_{(m)} = (c_1, \dots, c_m) \in c[m]$ ,  $N[m] = \{(N_1, \dots, N_m) | N_1 = 1, N_i > 0 \text{ for } i > 1\}$ ,

590  $t[m] = \{(t_1, \dots, t_m) | 0 = t_1 < \dots < t_m\}$ ,  $c[m] = \{(c_1, \dots, c_m) | c_m \in \mathcal{C}, c_i \in \mathcal{C} \cup$

591  $\mathcal{E} \text{ for } i = 1, \dots, m-1\}$ ,  $\mathcal{C} = \{\text{constant}\}$ , and  $\mathcal{E} = \{\text{exponential}\}$ .

592 The set  $S(m)$  was used as the wide-range parameter space to determine the  
 593 maximum likelihood. To find the best demographic history to explain the observed  
 594 SFS, the following procedures were used:

595 (1) The number of inference time intervals (or pieces)  $m$  is initially set to 1, and the  
 596 maximum likelihood  $\max L_1$  is determined with the constant size model (model in  
 597  $S(1)$ ).

598 (2) Increase  $m$  by 1. For each change of type  $c_{(m)}$ , parameters  $N_{(m)} = (N_1, \dots, N_m)$   
 599 and  $t_{(m)} = (t_1 = 0, t_2, \dots, t_m)$  are searched to maximize the likelihood by LUS

600 algorithm to fit the observed SFS. The maximum likelihood  $\max L_m$  is calculated  
601 with models in  $S(m)$  with all possible change types.  
602 (3) Repeat step (2) until  $(1 + \text{threshold}) \cdot \log(\max L_m) < \log(\max L_{m-1})$  is  
603 obtained. The best model corresponding  $\max L_{m-1}$  is determined to explain the  
604 observed SFS.  
605 (4) To avoid local optima, steps (1) – (3) are repeated  $K$  times to find the best model.  
606  $K = 10$  when analyzing simulated samples, and  $K = 200$  when analyzing the  
607 observed SFSs of the 1000GP and HGDP-CEPH populations.

608 To determine the threshold of log-likelihood promotion rate, a large number of  
609 simulations were performed (Table S9). For each model, 200 replicates were  
610 conducted, and the number of inference time intervals in the estimated demographic  
611 history was determined for each replicate. If the estimated number of inference time  
612 intervals was larger than the true number of inference time intervals, overfitting was  
613 recorded. When the former was smaller than the latter, underfitting was considered.  
614 The thresholds of 10%, 20%, and 30% were used. When 10% was used, the maximum  
615 overfitting rate was 2%. When 20% was used, all cases examined were inferred  
616 correctly. When 30% was used, the underfitting was observed in one of 20 examined  
617 models. Therefore, 20% was used as the threshold of log-likelihood promotion rate in  
618 subsequent analyses.

619

## 620 **Data simulation**

621 Data were simulated using *ms* (Hudson, 2002) and MaCS (Chen et al., 2009)  
622 software. Unless otherwise specified, a generation time was assumed to be 24 years  
623 (Liu and Fu, 2015; Scally and Durbin, 2012), the mutation rate  $\mu$  was set for  
624  $1.2 \times 10^{-8}$  per base per generation (Campbell et al., 2012; Conrad et al., 2011; Kong  
625 et al., 2012; Liu and Fu, 2015), and the recombination rate was  $r = 0.8\mu$ . For each  
626 model, 200 SFSs were simulated to calculate the median and 2.5 and 97.5 percentiles.  
627 When verifying the inferred demographic histories, 80,000 DNA fragments with the  
628 length of 10kb each were used for simulation, taking into the consideration of small  
629 fragments split by sequencing mask in 1000GP and HGDP-CEPH data sets. High  
630 frequency alleles of SFS (10% mutation types for Bottleneck I, II, III, VII, VIII, IX,  
631 and 15% for Bottleneck IV, V, VI) were removed when assessing models to verify the

632 super bottleneck. Detailed simulation command lines and demographic inference are  
633 presented in the Supplementary Text.

634

### 635 **1000 Genomes Project data**

636 Sequences of autosomal SNPs in 1000GP phase 3 (Altshuler et al., 2015) were  
637 downloaded from the 1000GP ftp server  
638 (<ftp://ftp.1000genomes.ebi.ac.uk/vol1/ftp/release/20130502/>), and 26 populations  
639 were analyzed, including seven African populations (ACB, ASW, ESN, GWD, LWK,  
640 MSL, and YRI), five European populations (CEU, FIN, GBR, IBS, and TSI), five  
641 East Asian populations (CDX, CHB, CHS, JPT, and KHV), five South Asian  
642 populations (BEB, GIH, ITU, PJL, and STU), and four American populations (CLM,  
643 MXL, PEL, and PUR). The 1000 GP strict mask was used to exclude artifacts of SNP  
644 calling. Noncoding regions except pseudogenes, defined by GENCODE release 35  
645 (Frankish et al., 2019), were examined to avoid potential effects of purifying selection.  
646 The number of sites that passed the filtering was 826,649,529 in the human genome.  
647 Bi-allelic polymorphic sites with high-confidence ancestral allele inference, according  
648 to 1000GP annotations, were used. To avoid the effect of positive selection, high  
649 frequency mutations were excluded, and the truncated SFS was used to infer  
650 demographic history (Figure S11; Table S10). The average proportion of excluded  
651 high-frequency SNPs for all 1000GP populations was 4.40%.

652

### 653 **HGDP-CEPH data**

654 In total, 24 populations were analyzed, including three African populations  
655 (Biaka, Mandeka, and Yoruba), five European populations (Adygei, Basque, French,  
656 Russian, and Sardinian), four Middle East populations (Bedouin, Druze, Mozabite,  
657 and Palestinian), three East Asian populations (Han, Japanese, and Yakut), eight  
658 Central and South Asian populations (Balochi, Brahui, Burusho, Hazara, Kalash,  
659 Makrani, Pathan, and Sindhi), and an American population (Maya). Only bi-allelic  
660 SNPs locating in GENCODE non-coding regions (Frankish et al., 2019) except  
661 pseudogenes that passed HGDP-CEPH filtering were used. HGDP-CEPH accessible  
662 mask was also used to filter SNPs (Bergstrom et al., 2020). The number of sites that  
663 passed the filtering was 791,999,125 in the human genome. Missing data were  
664 allowed to avoid artifacts due to imputation. The proportion of sites with two or more

665 missing individuals was less than 3% for all populations (Table S11). Each population  
666 had two SFSs, with one calculated from sites with no missing data, and another from  
667 sites with one missing individual. Similarly, truncated SFSs were used to avoid the  
668 effect of positive selection (Figures S12 and S13; Table S12). The average proportion  
669 of excluded high-frequency SNPs for all HGDP-CEPH populations was 7.18%.

670

### 671 **SFS truncation**

672 Denote the SFS of  $n$  samples by  $\vec{\lambda} = (\lambda_1, \dots, \lambda_{n-1})$ . An  $m$ -dimension vector  
673  $\vec{v} = (v_1, \dots, v_m)$  is said to be tail-up if there exist  $z \in \{1, \dots, m-1\}$  such that  
674  $v_z < \dots < v_m$ . If  $\vec{\lambda}$  is the expected SFS of a single varying size population, we have  
675  $\lambda_{\lfloor n/2 \rfloor} > \dots > \lambda_{n-1}$ . However, the observed SFS  $\vec{\xi} = (\xi_1, \dots, \xi_{n-1})$  may be tailed up  
676 because of some evolutionary factors, such as positive selection and population  
677 structure, which could introduce bias to the demographic inference. Therefore, the  
678 truncated SFS is recommended.

679 A simple procedure is implemented to discard the tail-up types of SFS,  
680 containing high-frequency mutations. To determine the truncated tail of SFS, a small  
681 window slides through the SFS. The cutoff is determined if  $\xi_i$  exceeds its random  
682 fluctuation range. Let  $\hat{n}(\vec{\xi}) = \max_{k \in \{1, \dots, n-1\}} \{k | \bar{w}_k(\vec{\xi}) - 3SD_k(\vec{\xi}) < w_{k-i(n)+1}, \dots, w_k <$   
683  $\bar{w}_k(\vec{\xi}) + 3SD_k(\vec{\xi})\}$ ,

684 where  $\bar{w}_k(\vec{\xi}) = \frac{1}{i(n)} \sum_{a=k-i(n)+1}^k \xi_a$ ,  $SD_k(\vec{\xi}) = \sqrt{\bar{w}_k(\vec{\xi})}$ , and

685  $i(n) = \begin{cases} 3 & n \leq 50 \\ 4 & 50 < n \leq 100 \\ 5 & n > 100 \end{cases}$ . The truncated SFS  $\vec{\xi}^T = (\xi_i)$ , where  $i = 1, \dots, k$ . In the

686 analysis, we used this strategy to truncate the SFS for each human population. We call  
687  $(n-k)/n$  the proportion of truncated SFS types.

688 When the truncating strategy was applied, the proportion of truncated SFS types  
689 was different for different populations (Table S5, S7). Therefore, to verify the effect  
690 of this strategy, the same truncating standard (~10%, the mean proportion) was also  
691 used for 1000GP populations (Figure S15). For HGDP-CEPH, because the proportion  
692 of considered SNPs without missing samples is larger than 80% for all populations,  
693 we used the corresponding SFS to determine the cutoff to truncate both SFSs.

694 Similarly, the same truncating standard (~15%, the mean proportion) was used for  
 695 HGDP-CEPH (Figure S15).

696

### 697 **Composite likelihood**

698 Denote  $\mu$  as the mutation rate per base pair per generation. Denote  $\vec{\xi} = (\xi_i)$  as  
 699 the observed number of SNPs of  $n$  sequences with  $\sigma$  base pair, where  $i =$   
 700  $1, \dots, n - 1$ . The expected SFS  $\vec{\lambda} = (\lambda_i)$ , where  $\lambda_i = \mu\sigma BL_i(N(\cdot))$ . Following the  
 701 Poisson probability and the previous studies (Hudson, 2001; Li and Stephan, 2006),  
 702 the composite likelihood could be written as

$$703 \quad L_{\mu,t}(\vec{\xi}, N(\cdot)) = \prod_{i=1}^{n-1} \frac{\lambda_i^{\xi_i} e^{-\lambda_i}}{\xi_i!}.$$

704 For missing data, we assume that  $\sigma^{(n)}$  base pair are sequenced in  $n$  samples  
 705 and  $S$  is the set of all sample sizes. We denote the observed number of SNPs of  
 706  $n(\in S)$  sequences by  $\vec{\xi}^{(n)} = (\xi_1^{(n)}, \dots, \xi_{n-1}^{(n)})$ . The expected SFS of  $n$   
 707 sequences  $\vec{\lambda}^{(n)} = (\lambda_1^{(n)}, \dots, \lambda_{n-1}^{(n)})$ , where  $\lambda_i^{(n)} = \mu\sigma^{(n)} BL_i^{(n)}(N(\cdot))$ ,  $BL_i^{(n)}(N(\cdot))$  is  
 708 the expected branch length of type  $i$  with  $n$  samples under population size  $N(\cdot)$ .  
 709 Total number of base pair is given by  $\sigma(S) := \sum_{n \in S} \sigma^{(n)}$ . The composite likelihood  
 710 could be written as

$$711 \quad \begin{aligned} & L_{\mu,t(n)_{n \in S}}((\vec{\xi}^{(n)})_{n \in S}, N(\cdot)) \\ &= \prod_{n \in S} L_{\mu,t(n)}(\vec{\xi}^{(n)}, N(\cdot)) \\ &= \prod_{n \in S} \prod_{i=1}^{n-1} \frac{(\lambda_i^{(n)})^{\xi_i^{(n)}} e^{-\lambda_i^{(n)}}}{\xi_i^{(n)}!} \end{aligned}$$

712 If SFS is tail-up, we use truncated SFS  $\vec{\xi}^T = (\xi_i)$ , where  $i = 1, \dots, k$ . The  
 713 composite likelihood is

$$714 \quad L_{\mu,t}(\vec{\xi}^T, N(\cdot)) = \prod_{i=1}^k \frac{\lambda_i^{\xi_i} e^{-\lambda_i}}{\xi_i!}.$$

715 Sequencing errors often affect rare mutations in a sample. Thus singletons and  
 716 mutations with size  $(n - 1)$  can be discarded. Although this is unnecessary in this



717 study, as a general method, the composite likelihood of an SFS without those  
718 mutations is

719 
$$L_{\mu,t}(\vec{\xi}, N(\cdot)) = \prod_{i=2}^{n-2} \frac{\lambda_i^{\xi_i} e^{-\lambda_i}}{\xi_i!}.$$

720

## 721 **Loss of genetic diversity due to the super bottleneck**

722 To measure the loss of current human genetic diversity due to the super  
723 bottleneck, we calculated the expected tree length of demographic histories with or  
724 without the super bottleneck. It was straightforward to ignore a bottleneck with  
725 instantaneous size changes, thus we considered seven 1000GP African populations  
726 (ACB, ASW, ESN, GWD, LWK, MSL and YRI) and one HGDP-CEPH African  
727 population (Yoruba). To remove the bottleneck, we replaced the population size  
728 during the super bottleneck with that after the bottleneck. We then compared the  
729 expected tree length of inferred demographic history ( $\omega_1$ ) with that of demographic  
730 history without the bottleneck ( $\omega_0$ ).

731 The loss of current genetic diversity due to the super bottleneck is  $(\omega_0 -$   
732  $\omega_1)/\omega_0$ . When the actual sample size was used for each population, the genetic  
733 diversity was measured as Watterson's  $\theta$ . The genetic diversity loss of these eight  
734 populations was 46.22% and the range was 32.17–60.56%.

735 When  $n = 2$ , the genetic diversity was measured as  $\pi$ , the pairwise nucleotide  
736 diversity. The loss of current genetic diversity in these eight populations was 65.85%  
737 and the range was 52.71–73.60%. It was larger than the estimate based on  
738 Watterson's  $\theta$  because the bottleneck was ancient and the recovery rate of  
739 Watterson's  $\theta$  was faster than that of  $\pi$  (Tajima, 1989). These results demonstrate  
740 the importance of the super bottleneck in the human evolution.

741

## 742 **QUANTIFICATION AND STATISTICAL ANALYSES**

### 743 **Validation of FitCoal calculation**

744 We verified the calculation of expected branch lengths in this section. Under the  
745 constant size model, when the sample size was small ( $n = 5$ , where  $n$  is the number

746 of sequences) or extremely large ( $n = 1,000$ ), FitCoal calculated the expected branch  
747 lengths correctly (Fu, 1995) (Figure S14, Table S13). Computational accuracy reaches  
748  $10^{-8}$  or  $10^{-11}$ . The high accuracy is important for the precise estimation of  
749 demographic history in the following sections.

750 Moreover, our results were almost the same as the expected branch lengths under  
751 three simple models calculated by using the Zivković-Wiehe method (Zivković and  
752 Wiehe, 2008) (Table S14). Since Zivković-Wiehe equations can be numerically  
753 solved when  $n < 50$ , we could not compare our results with theirs when the sample  
754 size was large.

755 For more complex models, the average branch lengths were obtained from  
756 extensive coalescent simulations. Although with certain variances, the simulated  
757 results were consistent with the FitCoal expected branch lengths under different  
758 demographic models (Table S15). Therefore, FitCoal can analytically derive the  
759 expected branch length for each SFS type under arbitrary demographic models.

760 We also compared the results obtained from the tabulated FitCoal and those from  
761 the original ones without tabulation. These results were nearly identical with each  
762 other (Tables S14 and S15). Since the former was much faster than the latter, the  
763 former was used to infer demographic histories. Hereafter, tabulated FitCoal is  
764 referred to as FitCoal for short, unless otherwise indicated.

765

### 766 **FitCoal- and simulation-based likelihood surface**

767 In this section, we compared two likelihood surfaces based FitCoal and  
768 simulation (Figure S1). We considered an instantaneous growth model. The  
769 population size increases from 10,000 ( $N_1$ ) to 20,000 ( $N_0$ ) at standard coalescent time  
770 0.2. For simplicity, we obtained a SFS by multiplying the expected branch length by  
771  $\theta l$  ( $= 4N_0\mu$ ), where  $\mu l = 1.0$ . The number of sequences is 100.

772 We then compared the FitCoal composite likelihood surface of the SFS and the  
773 composite likelihood surface of the SFS based on simulation approach. To draw the  
774 likelihood surfaces, we performed a grid search in a parameter space. We considered  
775 that the population size increase from  $N_1$  to  $N_0$  at standard coalescent time 0.2,  
776 where  $N_0$  ranges from 19,600 to 20,400 and  $N_1$  from 9,800 to 10,200. The

777 coalescent simulations were conducted by the ms software. The number of  
778 simulations is 100,000 to calculate the simulation-based likelihood.

779 The surface of FitCoal likelihood is smooth, but the surface of likelihood based  
780 on simulation approach is rugged (Figure S1). Moreover, the FitCoal likelihoods are  
781 also larger than those based on simulation approach because the FitCoal expected  
782 branch lengths fit the data better than the average branch lengths obtained from  
783 simulations.

784

### 785 **Demographic inference on simulated data**

786 It has been shown that FitCoal can precisely estimate the demographic histories  
787 under six different demographic models (Figure 2). We then validated the accuracy of  
788 FitCoal on more simulated data in this section.

789 Comparing with the examined cases (Figure 2), the performance of FitCoal can  
790 be further improved by providing a priori knowledge. In some circumstances, a slow  
791 and continuous change may be more biological relevant than a quick and sudden  
792 change and vice versa. FitCoal was then re-performed conditional on either  
793 exponential or instantaneous change within each inference time interval (Figures S16  
794 and S17). Our results showed that the FitCoal accuracy was enhanced in the presence  
795 of correct priori knowledge. Even if the condition was misspecified, the inferred  
796 demographic histories were still similar with the true histories.

797 FitCoal is a model-flexible method and the number of inference time intervals is  
798 dependent on the complexity of true demography. FitCoal has the power to detect  
799 more complex population histories (Figure S18). Although FitCoal may omit slight  
800 changes of population size occurred in short time periods, it has great ability to detect  
801 the major changes in all examined complex histories. When two-population split  
802 models are considered (Figure S19), FitCoal is reasonably accurate but with a slightly  
803 larger recent population size due to the effects of migration.

804

### 805 **Effects of positive selection**

806 To simulate samples affected by positive selection, we considered a two-locus  
807 model (Kim and Stephan, 2002) under a constant size model. We assumed that the  
808 effective population size was 27,000, and the number of neutral fragments were  
809 10,000, and 10 or 20% of them were partially linked with selected alleles. The  
810 distance between the neutral and the selected loci was 50kb, and recombination rate  
811 was 1cM per Mb. The sample size was 202 (the average sample size of 1000GP  
812 populations). The selection coefficient ( $s = 0.01$  or  $0.05$ ) was varied. We assumed a  
813 mutation rate of  $1.2 \times 10^{-8}$  per base per generation and a generation time of 24  
814 years. To compare among different cases, the fixed number SNPs (5,882,885 SNPs,  
815 the average number of SNPs in 1000GP populations) were applied. Under neutrality,  
816 it was equivalent to the sequenced length of 771.589 Mb.

817 All the simulated samples had a tail-up feature because of the excess of  
818 high-frequency mutations (Fay and Wu, 2000). Considering the low genetic diversity  
819 of selected loci, the contribution of selected loci to the genome-wide diversity was  
820 relatively low, thus only a slight excess of rare mutations (Fu and Li, 1993) was  
821 observed. The ratio between the number of singletons and doubletons ranged between  
822 2.01 and 2.10 in the simulated samples, only slightly larger than the expected value  
823 (2.0) under neutrality.

824 We then applied FitCoal to estimated demography. When the full SFSs were  
825 used, our results showed that the population size remains constant within 2,000 kry  
826 (Figure S5A). If the selection strength was greatly strong ( $s = 0.05$ , where  $s$  is the  
827 selection coefficient), FitCoal estimated a large ancient population  $\sim 240$  kyr ago  
828 because of the effects of high-frequency mutations. When the high-frequency  
829 mutations were removed (*i.e.* the truncated SFS), the large ancient population size  
830 was reduced (Figure S5B). If  $s = 0.01$  and 20% loci were subject to positive  
831 selection, a slight population expansion was observed, corresponding to the slight  
832 excess of rare mutations due to positive selection. Overall, a correct demographic  
833 history was estimated within two million years.

834

835 **Verification of inferred human demographic histories**

836 To evaluate the precision of the inferred human demographic histories (Figure 3),  
837 we simulated 200 data sets under each demographic history. The SFSs of simulated  
838 data fit the observed SFSs perfectly (Figures S20 and S21). The results showed that  
839 FitCoal, with truncated SFS, is highly accurate to reveal human demographic history  
840 (Figures S22 – S32). Moreover, when high-frequency mutations were discarded, the  
841 truncated proportion of SFS was different for different populations. To address the  
842 influence of truncated proportions, we inferred the demographic histories by setting  
843 the average truncating proportion within each data set (10% for 1000GP and 15% for  
844 HGDP-CEPH) (Fig S10). Results were consistent with the ones obtained above.  
845 Therefore, the strategy of truncating SFS does not affect our conclusions.

846 Similar with the log-likelihood ratio test, the number of inference time intervals  
847 was determined by the log-likelihood promotion rate when increasing the number of  
848 inference time intervals. It is recommended to use 20% as the threshold of  
849 log-likelihood promotion rate derived from extensive simulation results (Table S11).  
850 When analyzing the human data, the inferred demographic histories are not sensitive  
851 to this threshold (Figure S33, S34; Tables S16, S17). For example, the log-likelihood  
852 promotion rate for three and four inference time intervals of CEU is 2471.16 and  
853 17.07%, respectively. The number of inference time intervals is three, and the inferred  
854 demographic history is highly similar with that with four inference time intervals.  
855 Thus, the inferred demographic histories are robust to the threshold of 20%.

856

### 857 **The super bottleneck estimated in Africans**

858 In this section, we explored why the super bottleneck can only be estimated in  
859 the African population and provided the mathematical explanation. We proved that  
860 the inferred number of intervals before time  $t$  depends on the dimension of the SFS  
861 before time  $t$ .

862 Denote the probability of state  $l$  at time  $t$  from  $n$  samples by  $p_l^n(t)$ , where  
863  $l = 2, \dots, n$ . And denote the expected branch length of size  $i$  from  $n$  samples by  
864  $BL_i^n(N(\cdot))$ , where  $i = 1, \dots, n - 1$ . There exists an invertible matrix  $\mathcal{X} =$   
865  $(x_g^h)_{g,h=2,\dots,n}$  which only depends on  $n$ , such that  $p_l^n(t) = \sum_{g=2}^n x_g^l p_g^g(t)$  (Bhaskar

866 and Song, 2014; Polanski et al., 2003). If positive numbers  $m < n$ , there exist a

867 matrix  $\mathcal{Y} = (y_g^h)_{g=2,\dots,m,h=2,\dots,n}$ , which only depends on  $m$  and  $n$ , such that

868  $p_l^m(t) = \sum_{h=2}^n y_l^h p_h^n(t)$ . Combined with eq(1), there exist a matrix

869  $\mathcal{Z} = (z_g^h)_{g=1,\dots,m-1,h=1,\dots,n-1}$ , which only depends on  $m$  and  $n$ , such that

870  $BL_i^m(N(\cdot)) = \sum_{j=1}^{n-1} z_i^j BL_j^n(N(\cdot))$ .

871 Define the population size before time  $t$  by  $N^t(s) = N(t + s)$ . Denote the  
 872 expected branch length of state  $l$  before time  $t$  by  $B_l(t) = (b_{1,l}(t), \dots, b_{l-1,l}(t))$ ,  
 873 where  $b_{i,l}(t)$  represent the expected branch length of state  $l$  before time  $t$  of type  
 874  $i$  at time  $t$ . We have  $b_{j,l}(t) = p_l^n(t) BL_j^l(N^t(\cdot))$ .  $BL_{i,k}^t$  ( $i = 1, \dots, n - 1$ ) denote  
 875 the branch length of type  $i$  whose number of lineages are no more than  $k$  before  
 876 time  $t$ . We have

877 
$$BL_{i,k}^t = \sum_{l=2}^k \sum_{j=1}^{l-1} \frac{p(j \rightarrow i) p(l-j \rightarrow n-i)}{p(l \rightarrow n)} b_{j,l}(t),$$

878 where  $p(a \rightarrow b) = \begin{cases} \binom{b-1}{a-1} & b \geq a \geq 1 \\ 0 & \text{else} \end{cases}$ .

879 Then,

$$\begin{aligned} & BL_{i,k}^t \\ &= \sum_{l=2}^k \sum_{j=1}^{l-1} \frac{p(j \rightarrow i) p(l-j \rightarrow n-i)}{p(l \rightarrow n)} b_{j,l}(t) \\ 880 &= \sum_{l=2}^k \sum_{j=1}^{l-1} \frac{p(j \rightarrow i) p(l-j \rightarrow n-i)}{p(l \rightarrow n)} p_l^n(t) BL_j^l(N^t(\cdot)) \\ &= \sum_{h=1}^{k-1} \left( \sum_{l=2}^k \sum_{j=1}^{l-1} \frac{p(j \rightarrow i) p(l-j \rightarrow n-i)}{p(l \rightarrow n)} p_l^n(t) z_j^h \right) BL_h^k(N^t(\cdot)) \end{aligned}$$

881 Thus, the space that is generated by  $BL_{1,k}^t, \dots, BL_{n-1,k}^t$  can be generated by  
 882  $BL_1^k(N^t(\cdot)), \dots, BL_{k-1}^k(N^t(\cdot))$ . This leads that the dimension of  $(BL_{i,k}^t)_{i=1,\dots,n-1}$  is  
 883 no more than  $(k - 1)$ .

884 If the number of ancestral lineages is no more than  $k$  before a given standard  
 885 coalescent time  $t$ , the number of inference time intervals should be no more than  
 886  $(k - 1)$  before time  $t$  in the inferred demographic history without overfitting.  
 887 Technically speaking, if a high proportion of the number of ancestral lineages is no  
 888 more than  $k$  before a given standard coalescent time  $t$ , we have the same conclusion  
 889 because it is an inferred demographic history.

890 For the non-African populations, when  $t = 1.0$ , the number of ancestral lineages  
 891 is no more than three in more than 90% cases (Table S18), indicating the power to

892 infer an constant size model (with one inference time interval), an expansion or  
893 contraction (with two inference time intervals) beyond this time point. The end time  
894 of the super bottleneck is 813 (772–864) kyr ago and the corresponding standard  
895 coalescent time is larger than 1.0 for all non-African populations (Figure 3C, F).  
896 Therefore, the super bottleneck cannot be inferred in this case since the bottleneck  
897 contains three inference time intervals.

898

### 899 **Confounding factors of bottleneck**

900 African populations have complex population structure (Hsieh et al., 2016;  
901 Lopez et al., 2018; Schlebusch and Jakobsson, 2018; Skoglund et al., 2017), and a  
902 complex population structure model is proposed for African and European  
903 populations (Lopez et al., 2018) (Figure S35). To address the effects of population  
904 structure, we simulated data for a western rainforest hunter-gatherer (wRHG) and a  
905 western farmer (wARG) population and estimated their demographic histories (Figure  
906 S35). Due to frequent migrations, a larger recent population size is estimated for both  
907 populations. However, the ancient population size (14,427) is accurately inferred for  
908 both populations (14,493 and 14,428). Thus, the super bottleneck is not due to the  
909 complex African population structure.

910 To consider the effects of archaic introgression from ghost populations (Beerli,  
911 2004; Durvasula and Sankararaman, 2020), we examined different models by  
912 assuming that introgression happened in different time periods with different  
913 migration rates (Figure S36). Results show that archaic introgression does not result  
914 in an ancient super bottleneck.

915 Truncated SFS was used in demography inference in this study. To examine the  
916 effects of SFS truncation, the FitCoal inference was re-performed by taking the full  
917 SFSs that include high-frequency derived mutations. Again, the super bottleneck is  
918 revealed only in the African populations, but not in the non-African populations  
919 (Figures S37 and S38). Therefore, the ancient super bottleneck is not due to the  
920 effects of SFS truncation.

921

922 **Computational performance**

923 We compared the performance of the FitCoal with or without tabulation. We  
924 applied them to analyze the data of YRI population by fixing four inference time  
925 intervals and allowing instantaneous population size change. The former is much  
926 faster than the latter (1 second vs 36.2 hours).

927

928 **DATA AND SOFTWARE AVAILABILITY**

929 The authors declare that all data are available in the main text and the  
930 supplementary materials. FitCoal is a free plug-in of the eGPS software (Yu et al.,  
931 2019) and can be downloaded and run as an independent package. FitCoal and its  
932 documentation are available via Zenodo at  
933 <https://zenodo.org/record/4805461#.YNI61Ey-vuo>, our institute website at  
934 <http://www.picb.ac.cn/evolgen/>, and eGPS website <http://www.egps-software.net/>.  
935 Raw data were deposited on Mendeley  
936 ([https://data.mendeley.com/datasets/xmf5r8nzn/draft?a=8e2a5abe-de47-4ab7-a313-e](https://data.mendeley.com/datasets/xmf5r8nzn/draft?a=8e2a5abe-de47-4ab7-a313-e2e5526cbc55)  
937 [2e5526cbc55](https://data.mendeley.com/datasets/xmf5r8nzn/draft?a=8e2a5abe-de47-4ab7-a313-e2e5526cbc55)).

938



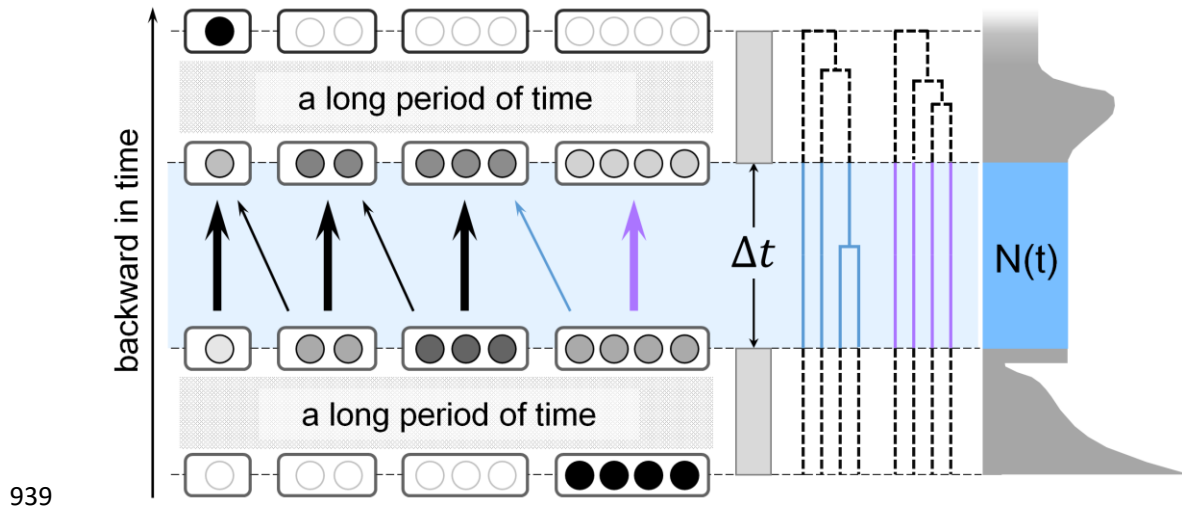

940 **Figure 1. Illustration of the fast infinitesimal time coalescent (FitCoal) process.**

941 The left panel shows the backward process in which four lineages coalesce into one  
942 after passing through millions of infinitesimal time intervals. The highlighted area  
943 shows the backward transformation process of different states with tiny probability  
944 changes in an infinitesimal time interval ( $\Delta t$ ). Thick arrows indicate high  
945 transformation probabilities, and thin arrows indicate low transformation probabilities.  
946 Each state is indicated with a rounded rectangle, in which one circle indicates one  
947 lineage. The rounded rectangles with black filled circles are the states with probability  
948 1. The rounded rectangles with empty circles are the states with probability 0. The  
949 probabilities between 0 and 1 are indicated by grey circles. The middle panel shows  
950 branches of different states. The right panel shows the demographic history of a  
951 population. The width of shadowed area indicates the effective population size, *i.e.*,  
952 the number of breeding individuals (Harpending et al., 1998). It is assumed that the  
953 effective population size remains unchanged within  $\Delta t$ .

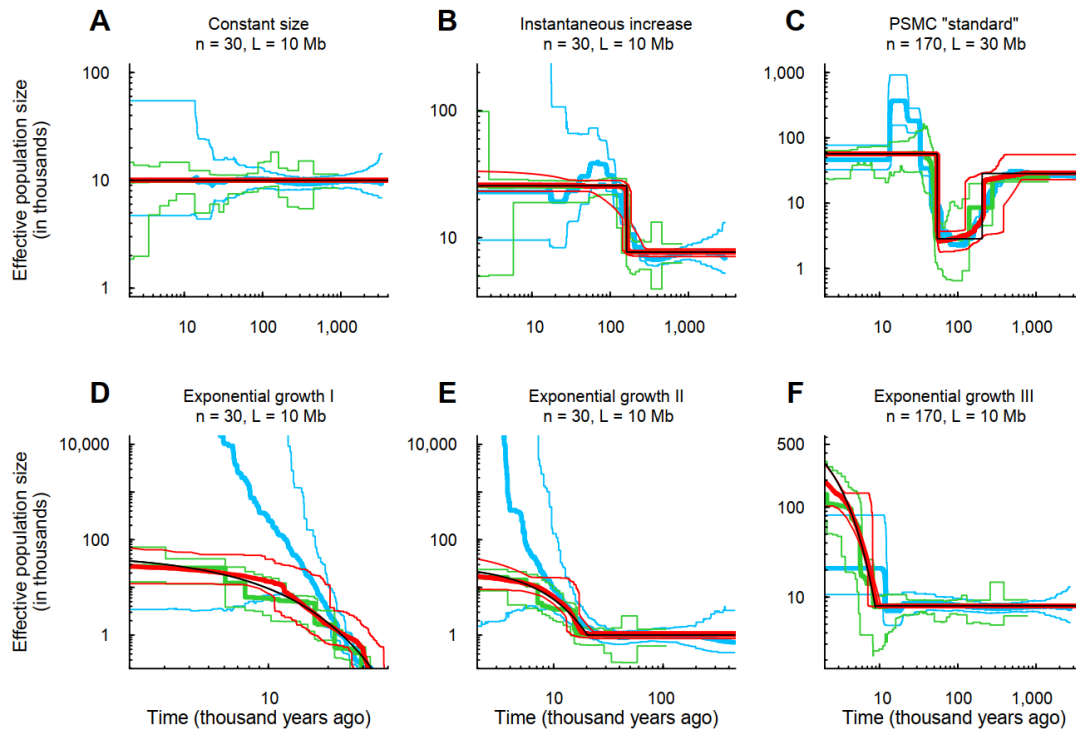

954

955 **Figure 2. Demographic histories estimated by FitCoal, stairway plot, and PSMC**

956 **using simulated samples. (A) Constant size model. (B) Instantaneous increase model.**

957 **(C) PSMC “standard” model. (D) Exponential growth I model. (E) Exponential**

958 **growth II model. (F) Exponential growth III model. These six models are the same as**

959 **those of the previous study by Liu and Fu (Liu and Fu, 2015). Thin black lines**

960 **indicate true models. Thick red lines indicate the medians of FitCoal estimated**

961 **histories; thin red lines are 2.5 and 97.5 percentiles of FitCoal estimated histories.**

962 **Green and blue lines indicate the results of stairway plot and PSMC, respectively, of**

963 **the previous study (Liu and Fu, 2015). The mutation rate is assumed to be  $1.2 \times 10^{-8}$**

964 **per base per generation, and a generation time is assumed to be 24 years.  $n$  is the**

965 **number of simulated sequences, and  $L$  is the length of simulated sequences.**

966

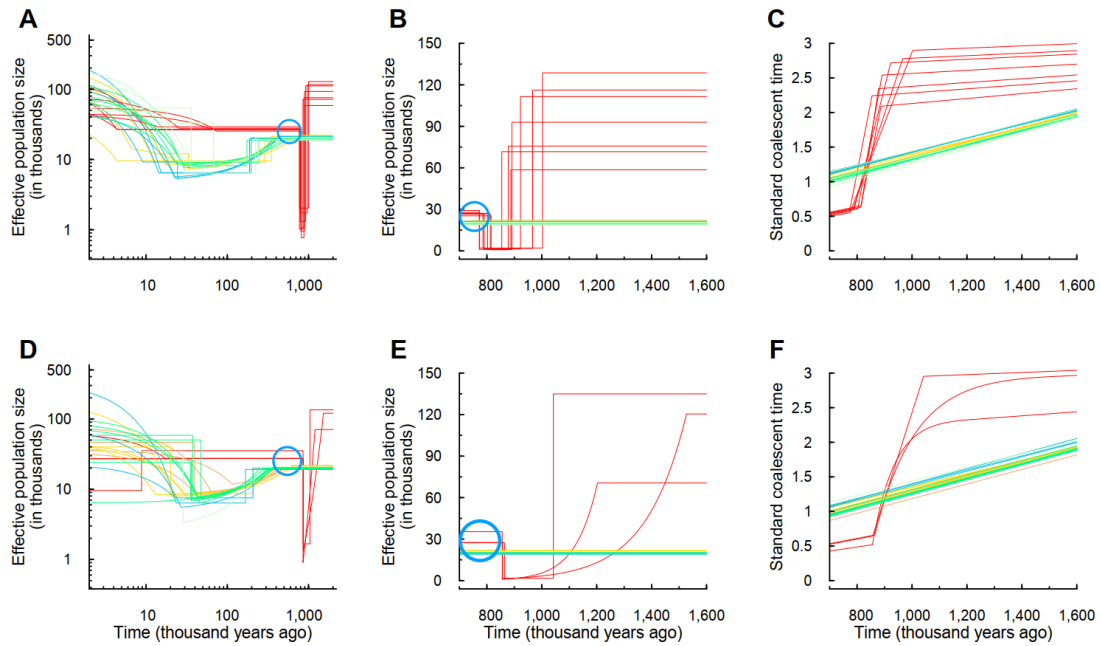

967

968 **Figure 3. FitCoal estimated histories of human populations using 1000GP and**

969 **HGPD-CEPH genomic data sets. (A)** Estimated histories of 26 populations in

970 1000GP. **(B)** Linear-scaled estimation of histories of 1000GP populations during the

971 super bottleneck period. **(C)** Calendar time vs standard coalescent time of estimated

972 histories of 1000GP populations. **(D)** Estimated histories of 24 HGPD-CEPH

973 populations. **(E)** Linear-scaled estimation of histories of HGPD-CEPH populations

974 during the super bottleneck period. **(F)** Calendar time vs standard coalescent time of

975 estimated histories of HGPD-CEPH populations. Various color lines indicate the

976 following: red, African populations; yellow, European populations; brown, Middle

977 East populations; blue, East Asian populations; green, Central or South Asian

978 populations; and dark sea green, American populations. Blue circles show the

979 population size gap between the African and non-African populations, indicating the

980 hidden effect of the super bottleneck in non-African populations. The mutation rate is

981 assumed to be  $1.2 \times 10^{-8}$  per base per generation, and a generation time is assumed

982 to be 24 years.

983

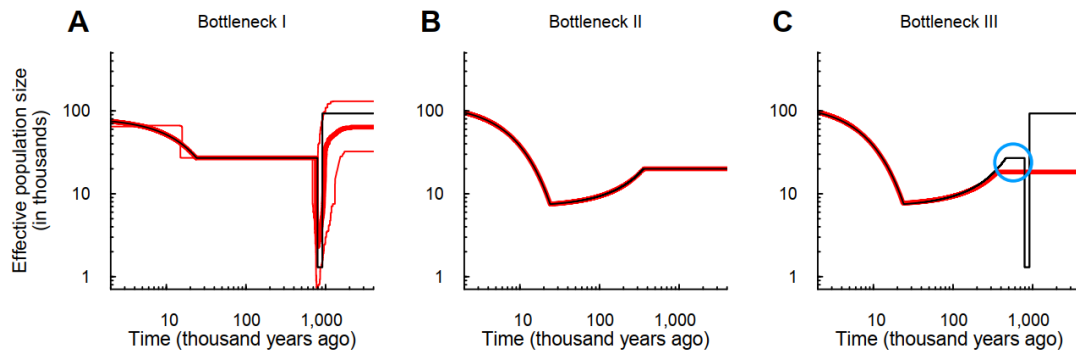

984

985 **Figure 4. Verification of the super bottleneck.** (A) Bottleneck I model, mimicking  
986 the demography of 1000GP African population and its estimated histories. (B)  
987 Bottleneck II model, mimicking the estimated demography of 1000GP non-African  
988 population and its estimated histories. (C) Bottleneck III model, mimicking the true  
989 demography of 1000GP non-African population and its estimated histories. Thin  
990 black lines indicate models. Thick red lines denote the medians of FitCoal estimated  
991 histories; thin red lines represent 2.5 and 97.5 percentiles of FitCoal estimated  
992 histories. Blue circle indicates the population size gap, the hidden effect of the super  
993 bottleneck in non-African populations. The mutation rate is assumed to be  $1.2 \times$   
994  $10^{-8}$  per base per generation, and a generation time is assumed to be 24 years. The  
995 number of simulated sequences is 202 in Bottleneck I and 200 in Bottleneck II and III.  
996 The length of simulated sequence is 800 Mb.

997

998

999
