# Supplementary material for: Genomic inference of a human super bottleneck in Mid-Pleistocene transition
Source: bioRxiv or medRxiv preprint supplement (doi:10.1101/2021.05.16.444351), 2021-06-28
Supplement: Supplementary file [file media-1.pdf]

1 Supplementary information

2

3 **Genomic inference of a human super bottleneck in the Early Stone Age**

4

5 Wangjie Hu<sup>1,†</sup>, Ziqian Hao<sup>1,†</sup>, Pengyuan Du<sup>1</sup>, Yi-Hsuan Pan<sup>2,\*</sup>, Haipeng Li<sup>1,3,\*</sup>

6

7 <sup>1</sup>CAS Key Laboratory of Computational Biology, Shanghai Institute of Nutrition and  
8 Health, University of Chinese Academy of Sciences, Chinese Academy of Sciences,  
9 Shanghai 200031, China.

10 <sup>2</sup>Key Laboratory of Brain Functional Genomics of Ministry of Education, School of Life  
11 Science, East China Normal University, Shanghai 200062, China.

12 <sup>3</sup>Center for Excellence in Animal Evolution and Genetics, Chinese Academy of Sciences,  
13 Kunming 650223, China.

14

15 †These authors contributed equally.

16

17 \*Corresponding Authors: [yxpan@sat.ecnu.edu.cn](mailto:yxpan@sat.ecnu.edu.cn); [lihaipeng@picb.ac.cn](mailto:lihaipeng@picb.ac.cn)

18

19

20

21

22 **Table of Contents**

23 List of Symbols ..... 6

24 Validation of FitCoal calculation ..... 6

25 SFS truncation ..... 7

26 Composite likelihood..... 8

27 FitCoal- and simulation-based likelihood surface..... 9

28 Demographic inference on simulated data ..... 9

29 Effects of positive selection..... 10

30 Verification of inferred human demographic histories..... 11

31 Alternative hypotheses of the super bottleneck ..... 12

32 Loss of genetic diversity due to the super bottleneck ..... 12

33 The super bottleneck estimated in Africans ..... 13

34 Confounding factors of bottleneck ..... 14

35 Computational performance ..... 15

36 Models and simulation commands for Fig. S35 ..... 15

37 Models and simulation commands for Table S15 ..... 16

38 Models for verifying the accuracy of FitCoal ..... 17

39

40

41

## 42 **List of figures**

- 43 Figure S1. Comparison of likelihood surfaces based on simulations and FitCoal.
- 44 Figure S2. Effects of sequence length (a), sample size (b), and recombination rate (c) in  
45 the FitCoal inference.
- 46 Figure S3. Verification of FitCoal accuracy with truncated SFS.
- 47 Figure S4. Verification of FitCoal accuracy with truncated SFS under more complexed  
48 models.
- 49 Figure S5. Effects of positive selection on demographic inference.
- 50 Figure S6. Inferred demographic histories and standard coalescent times of 1000GP  
51 populations.
- 52 Figure S7. Inferred demographic histories and standard coalescent times of HGDP-CEPH  
53 populations.
- 54 Figure S8. Verification of the HGDP-CEPH inferred super bottleneck.
- 55 Figure S9. Verification of the super bottleneck in artificial models.
- 56 Figure S10. Inferred demographic histories of 1000GP and HGDP-CEPH populations  
57 using the same truncating SFS standard for each data set
- 58 Figure S11. The observed SFSs of 1000GP populations.
- 59 Figure S12. The observed SFSs without missing data of HGDP-CEPH populations.
- 60 Figure S13. The observed SFSs with one missing individual of HGDP-CEPH populations.
- 61 Figure S14. Estimated demographic histories of FitCoal conditional on exponential  
62 change, stairway plot, and PSMC using simulated samples.
- 63 Figure S15. Estimated demographic histories of FitCoal conditional on instantaneous  
64 change, stairway plot, and PSMC using simulated samples.
- 65 Figure S16. Verification of the accuracy of FitCoal using simulated samples under  
66 complex models.
- 67 Figure S17. Verification of FitCoal accuracy under three migration models.
- 68 Figure S18. 95% confidence intervals of 1000GP African populations.
- 69 Figure S19. 95% confidence intervals of 1000GP European populations.
- 70 Figure S20. 95% confidence intervals of 1000GP East Asian populations.
- 71 Figure S21. 95% confidence intervals of 1000GP South Asian populations.
- 72 Figure S22. 95% confidence intervals of 1000GP American populations.

73 Figure S23. 95% confidence intervals of HGPD-CEPH African populations.  
74 Figure S24. 95% confidence intervals of HGPD-CEPH Middle East populations.  
75 Figure S25. 95% confidence intervals of HGPD-CEPH European populations.  
76 Figure S26. 95% confidence intervals of HGPD-CEPH East Asian populations.  
77 Figure S27. 95% confidence intervals of HGPD-CEPH Central & South Asian  
78 populations.  
79 Figure S28. 95% confidence intervals of HGPD-CEPH American population.  
80 Figure S29. Inferred demographic histories with different inference time intervals of  
81 1000GP populations.  
82 Figure S30. Inferred demographic histories with different inference time intervals of  
83 HGPD-CEPH American populations.  
84 Figure S31. Verification of inference accuracy under complex population structure model.  
85 Figure S32. Verification of inference accuracy when migration occurred with unknown  
86 hominin population.  
87 Figure S33. Estimated demographic histories using the full and the truncated SFSs of  
88 1000GP populations.  
89 Figure S34. Estimated demographic histories using the full and the truncated SFSs of  
90 HGDP-CEPH populations.  
91 Figure S35. Comparison of the expected branch lengths of FitCoal and the average  
92 branch lengths of coalescent simulations.  
93

## List of tables

|     |                                                                                            |
|-----|--------------------------------------------------------------------------------------------|
| 94  |                                                                                            |
| 95  | Table S1. Proportion of correctly-inferred change type for the most recent demographic     |
| 96  | event in six models.                                                                       |
| 97  | Table S2. Parameters of the super bottleneck in 1000GP African populations.                |
| 98  | Table S3. Parameters of the super bottleneck in HGDP-CEPH African populations              |
| 99  | Table S4. Parameters of the out-of-Africa bottleneck in 1000GP non-African populations.    |
| 100 | Table S5. Parameters of the out-of-Africa bottleneck in HGDP-CEPH non-African              |
| 101 | populations.                                                                               |
| 102 | Table S6. The super bottleneck parameters of Bottleneck I model.                           |
| 103 | Table S7. The super bottleneck parameters of Bottleneck IV model.                          |
| 104 | Table S8. Super bottleneck parameters of Bottleneck VII model.                             |
| 105 | Table S9. Influence of different log-likelihood promotion thresholds.                      |
| 106 | Table S10. Information of truncated SFS of 1000GP populations.                             |
| 107 | Table S11. Proportion of SNPs without or with missing data of HGDP-CEPH                    |
| 108 | populations.                                                                               |
| 109 | Table S12. Information of truncated SFS of HGDP-CEPH populations.                          |
| 110 | Table S13. Comparison of branch length between theoretical values and FitCoal under        |
| 111 | the constant size model.                                                                   |
| 112 | Table S14. Comparison of accuracy between FitCoal and Z-W's method.                        |
| 113 | Table S15. Comparison of accuracy between FitCoal and simulations.                         |
| 114 | Table S16. Likelihood promotion rate of inferred demographic histories with different      |
| 115 | inference time intervals of 1000GP populations.                                            |
| 116 | Table S17. Likelihood promotion rate of inferred demographic histories with different      |
| 117 | inference time intervals of HGDP-CEPH populations.                                         |
| 118 | Table S18. Probabilities of each state (the number of ancestral lineages remained) at time |
| 119 | $t$ .                                                                                      |
| 120 |                                                                                            |
| 121 |                                                                                            |

122 **List of Symbols**

| Symbol                     | Meaning                                                                                                                                                                   |
|----------------------------|---------------------------------------------------------------------------------------------------------------------------------------------------------------------------|
| $N(\cdot)$                 | Demographic history, or varying population size.                                                                                                                          |
| $t$                        | Standard coalescent time (scaled by $2N(t)$ generations).                                                                                                                 |
| $\tau$                     | One-point scaled time (scaled by $2N(0)$ generations).                                                                                                                    |
| $n$                        | Sample size, or the number of sampled chromosomes.                                                                                                                        |
| $l$                        | State (the number of lineages).                                                                                                                                           |
| $p_l(t)$                   | Probability of state $l$ at time $t$ .                                                                                                                                    |
| $i$                        | Size of branch.                                                                                                                                                           |
| $BL_i(N(\cdot))$           | Expected branch length of size $i$ given population size, in number of generations.                                                                                       |
| $\vec{\xi} = (\xi_i)$      | SFS, $i = 1, \dots, n - 1$ . $\xi_i$ is the number of mutations with size $i$ . $\xi_1$ is usually called the number of singletons, and $\xi_2$ the number of doubletons. |
| $\{t_0, t_1, \dots, t_m\}$ | Time partition, and $0 = t_0 < t_1 < \dots < t_m$ .                                                                                                                       |

123

124

125 **Validation of FitCoal calculation**

126 We verified the calculation of expected branch lengths in this section. Under the  
 127 constant size model, when the sample size was small ( $n = 5$ , where  $n$  is the number of  
 128 sequences) or extremely large ( $n = 1,000$ ), FitCoal calculated the expected branch  
 129 lengths correctly<sup>1</sup> (Table S13). Computational accuracy reached  $10^{-8}$  or  $10^{-11}$ . The high  
 130 accuracy is important for the precise estimation of demographic history in the following  
 131 sections.

132 Moreover, our results were almost the same as the expected branch lengths under  
 133 three simple models calculated by using the Zivković-Wiehe method<sup>2</sup> (Table S14). Since  
 134 Zivković-Wiehe equations can be numerically solved when  $n < 50$ , we could not  
 135 compare our results with theirs when the sample size was large.

136 For more complex models, the average branch lengths were obtained from extensive  
 137 coalescent simulations. Although with certain variances, the simulated results were

138 consistent with the FitCoal expected branch lengths under different demographic models  
 139 (Table S15). Therefore, FitCoal can analytically derive the expected branch length for  
 140 each SFS type under arbitrary demographic models.

141 We also compared the results obtained from the tabulated FitCoal and those from the  
 142 original ones without tabulation. These results were nearly identical with each other  
 143 (Tables S14 and S15). Since the former was much faster than the latter, the former was  
 144 used to infer demographic histories. Hereafter, tabulated FitCoal is referred to as FitCoal  
 145 for short, unless otherwise indicated.

146

## 147 SFS truncation

148 Denote the SFS of  $n$  samples by  $\vec{\lambda} = (\lambda_1, \dots, \lambda_{n-1})$ . An  $m$ -dimension vector  
 149  $\vec{v} = (v_1, \dots, v_m)$  is said to be tail-up if there exist  $z \in \{1, \dots, m - 1\}$  such that  $v_z < \dots <$   
 150  $v_m$ . If  $\vec{\lambda}$  is the expected SFS of a single varying size population, we have  $\lambda_{\lfloor n/2 \rfloor} > \dots >$   
 151  $\lambda_{n-1}$ . However, the observed SFS  $\vec{\xi} = (\xi_1, \dots, \xi_{n-1})$  may be tailed up because of some  
 152 evolutionary factors, such as positive selection and population structure, which could  
 153 introduce bias to the demographic inference. Therefore, the truncated SFS is  
 154 recommended.

155 A simple procedure is implemented to discard the tail-up types of SFS, containing  
 156 high-frequency mutations. To determine the truncated tail of SFS, a small window slides  
 157 through the SFS. The cutoff is determined if  $\xi_i$  exceeds its random fluctuation range. Let

$$158 \hat{n}(\vec{\xi}) = \max_{k \in \{1, \dots, n-1\}} \{k | \bar{w}_k(\vec{\xi}) - 3SD_k(\vec{\xi}) < w_{k-i(n)+1}, \dots, w_k < \bar{w}_k(\vec{\xi}) + 3SD_k(\vec{\xi})\},$$

$$159 \text{ where } \bar{w}_k(\vec{\xi}) = \frac{1}{i(n)} \sum_{a=k-i(n)+1}^k \xi_a, SD_k(\vec{\xi}) = \sqrt{\bar{w}_k(\vec{\xi})}, \text{ and } i(n) = \begin{cases} 3 & n \leq 50 \\ 4 & 50 < n \leq 100. \\ 5 & n > 100 \end{cases}$$

160 The truncated SFS  $\vec{\xi}^T = (\xi_i)$ , where  $i = 1, \dots, k$ . In the analysis, we used this strategy to  
 161 truncate the SFS for each human population. We call  $(n - k)/n$  the proportion of  
 162 truncated SFS types.

163 When the truncating strategy was applied, the proportion of truncated SFS types was  
 164 different for different populations (Table S5, S7). Therefore, to verify the effect of this  
 165 strategy, the same truncating standard (~10%, the mean proportion) was also used for

166 1000GP populations (Fig. S10). For HGDP-CEPH, because the proportion of considered  
 167 SNPs without missing samples is larger than 80% for all populations, we used the  
 168 corresponding SFS to determine the cutoff to truncate both SFSs. Similarly, the same  
 169 truncating standard (~15%, the mean proportion) was used for HGDP-CEPH (Fig. S10).  
 170

## 171 Composite likelihood

172 Denote  $\mu$  as the mutation rate per base pair per generation. Denote  $\vec{\xi} = (\xi_i)$  as the  
 173 observed number of SNPs of  $n$  sequences with  $\sigma$  base pair, where  $i = 1, \dots, n - 1$ . The  
 174 expected SFS  $\vec{\lambda} = (\lambda_i)$ , where  $\lambda_i = \mu\sigma BL_i(N(\cdot))$ , . Following the Poisson probability  
 175 and the previous studies<sup>3,4</sup>, the composite likelihood could be written as

$$176 \quad L_{\mu,t}(\vec{\xi}, N(\cdot)) = \prod_{i=1}^{n-1} \frac{\lambda_i^{\xi_i} e^{-\lambda_i}}{\xi_i!}.$$

177 For missing data, we assume that  $\sigma^{(n)}$  base pair are sequenced in  $n$  samples and  $S$  is  
 178 the set of all sample sizes. We denote the observed number of SNPs of  $n(\in S)$  sequences  
 179 by  $\vec{\xi}^{(n)} = (\xi_1^{(n)}, \dots, \xi_{n-1}^{(n)})$ . The expected SFS of  $n$  sequences  $\vec{\lambda}^{(n)} = (\lambda_1^{(n)}, \dots, \lambda_{n-1}^{(n)})$ ,  
 180 where  $\lambda_i^{(n)} = \mu\sigma^{(n)} BL_i^{(n)}(N(\cdot))$ ,  $BL_i^{(n)}(N(\cdot))$  is the expected branch length of type  $i$  with  
 181  $n$  samples under population size  $N(\cdot)$ . Total number of base pair is given by  $\sigma(S)$   
 182  $:= \sum_{n \in S} \sigma^{(n)}$ . The composite likelihood could be written as

$$183 \quad \begin{aligned} & L_{\mu,t^{(n)}}_{n \in S}((\vec{\xi}^{(n)})_{n \in S}, N(\cdot)) \\ &= \prod_{n \in S} L_{\mu,t^{(n)}}(\vec{\xi}^{(n)}, N(\cdot)) \\ &= \prod_{n \in S} \prod_{i=1}^{n-1} \frac{(\lambda_i^{(n)})^{\xi_i^{(n)}} e^{-\lambda_i^{(n)}}}{\xi_i^{(n)}!} \end{aligned}$$

184 If SFS is tail-up, we use truncated SFS  $\vec{\xi}^T = (\xi_i)$ , where  $i = 1, \dots, k$ . The composite  
 185 likelihood is

$$186 \quad L_{\mu,t}(\vec{\xi}^T, N(\cdot)) = \prod_{i=1}^k \frac{\lambda_i^{\xi_i} e^{-\lambda_i}}{\xi_i!}.$$

187 Sequencing errors often affect rare mutations in a sample. Thus singletons and  
 188 mutations with size  $(n - 1)$  can be discarded. Although this is unnecessary in this study,  
 189 as a general method, the composite likelihood of an SFS without those mutations is



190 
$$L_{\mu,t}(\vec{\xi}, N(\cdot)) = \prod_{i=2}^{n-2} \frac{\lambda_i^{\xi_i} e^{-\lambda_i}}{\xi_i!}.$$

191

## 192 **FitCoal- and simulation-based likelihood surface**

193 In this section, we compared two likelihood surfaces based FitCoal and simulation  
194 (Fig. S1). We considered an instantaneous growth model. The population size increases  
195 from 10,000 ( $N_1$ ) to 20,000 ( $N_0$ ) at standard coalescent time 0.2. For simplicity, we  
196 obtained a SFS by multiplying the expected branch length by  $\theta l$  ( $= 4N_0\mu$ ), where  
197  $\mu l = 1.0$ . The number of sequences is 100.

198 We then compared the FitCoal composite likelihood surface of the SFS and the  
199 composite likelihood surface of the SFS based on simulation approach. To draw the  
200 likelihood surfaces, we performed a grid search in a parameter space. We considered that  
201 the population size increase from  $N_1$  to  $N_0$  at standard coalescent time 0.2, where  $N_0$   
202 ranges from 19,600 to 20,400 and  $N_1$  from 9,800 to 10,200. The coalescent simulations  
203 were conducted by the ms software. The number of simulations is 100,000 to calculate  
204 the simulation-based likelihood.

205 The surface of FitCoal likelihood is smooth, but the surface of likelihood based on  
206 simulation approach is rugged (Fig. S1). Moreover, the FitCoal likelihoods are also larger  
207 than those based on simulation approach because the FitCoal expected branch lengths fit  
208 the data better than the average branch lengths obtained from simulations.

209

## 210 **Demographic inference on simulated data**

211 It has been shown that FitCoal can precisely estimate the demographic histories  
212 under six different demographic models (Fig. 2). We then validated the accuracy of  
213 FitCoal on more simulated data in this section.

214 Comparing with the examined cases (Fig. 2), the performance of FitCoal can be  
215 further improved by providing a priori knowledge. In some circumstances, a slow and  
216 continuous change may be more biological relevant than a quick and sudden change and  
217 vice versa. FitCoal was then re-performed conditional on either exponential or  
218 instantaneous change within each inference time interval (Fig. S14 and S15). Our results

219 showed that the FitCoal accuracy was enhanced in the presence of correct priori  
220 knowledge. Even if the condition was misspecified, the inferred demographic histories  
221 were still similar with the true histories.

222 FitCoal is a model-flexible method and the number of inference time intervals is  
223 dependent on the complexity of true demography. FitCoal has the power to detect more  
224 complex population histories (Fig. S16). Although FitCoal may omit slight changes of  
225 population size occurred in short time periods, it has great ability to detect the major  
226 changes in all examined complex histories. When two-population split models are  
227 considered (Fig. S17), FitCoal is reasonably accurate but with a slightly larger recent  
228 population size due to the effects of migration.

229

## 230 **Effects of positive selection**

231 To simulate samples affected by positive selection, we considered a two-locus  
232 model<sup>5</sup> under a constant size model. We assumed that the effective population size was  
233 27,000, and the number of neutral fragments were 10,000, and 10 or 20% of them were  
234 partially linked with selected alleles. The distance between the neutral and the selected  
235 loci was 50kb, and recombination rate was 1cM per Mb. The sample size was 202 (the  
236 average sample size of 1000GP populations). The selection coefficient ( $s = 0.01$  or  $0.05$ )  
237 was varied. We assumed a mutation rate of  $1.2 \times 10^{-8}$  per base per generation and a  
238 generation time of 24 years. To compare among different cases, the fixed number SNPs  
239 (5,882,885 SNPs, the average number of SNPs in 1000GP populations) were applied.  
240 Under neutrality, it was equivalent to the sequenced length of 771.589 Mb.

241 All the simulated samples had a tail-up feature because of the excess of high-  
242 frequency mutations<sup>6</sup>. Considering the low genetic diversity of selected loci, the  
243 contribution of selected loci to the genome-wide diversity was relatively low, thus only a  
244 slight excess of rare mutations<sup>7</sup> was observed. The ratio between the number of  
245 singletons and doubletons ranged between 2.01 and 2.10 in the simulated samples, only  
246 slightly larger than the expected value (2.0) under neutrality.

247 We then applied FitCoal to estimated demography. When the full SFSs were used,  
248 our results showed that the population size remains constant within 2,000 kry (Fig. S5a).  
249 If the selection strength was greatly strong ( $s = 0.05$ , where  $s$  is the selection coefficient),

250 FitCoal estimated a large ancient population ~240 kyr ago because of the effects of high-  
251 frequency mutations. When the high-frequency mutations were removed (*i.e.* the  
252 truncated SFS), the large ancient population size was reduced (Fig. S5b). If  $s = 0.01$  and  
253 20% loci were subject to positive selection, a slight population expansion was observed,  
254 corresponding to the slight excess of rare mutations due to positive selection. Overall, a  
255 correct demographic history was estimated within two million years.

256

## 257 **Verification of inferred human demographic histories**

258 To evaluate the precision of the inferred human demographic histories (Fig. 3), we  
259 simulated 200 data sets under each demographic history. The results showed that FitCoal,  
260 with truncated SFS, is highly accurate to reveal human demographic history (Fig. S18 –  
261 S28). Moreover, when high-frequency mutations were discarded, the truncated proportion  
262 of SFS was different for different populations. To address the influence of truncated  
263 proportions, we inferred the demographic histories by setting the average truncating  
264 proportion within each data set (10% for 1000GP and 15% for HGDP-CEPH) (Fig S10).  
265 Results were consistent with the ones obtained above. Therefore, the strategy of  
266 truncating SFS does not affect our conclusions.

267 Similar with the log-likelihood ratio test, the number of inference time intervals was  
268 determined by the log-likelihood promotion rate when increasing the number of inference  
269 time intervals. It is recommended to use 20% as the threshold of log-likelihood  
270 promotion rate derived from extensive simulation results (Table S11). When analyzing  
271 the human data, the inferred demographic histories are not sensitive to this threshold (Fig.  
272 S29, S30; Tables S16, S17). For example, the log-likelihood promotion rate for three and  
273 four inference time intervals of CEU is 2471.16 and 17.07%, respectively. The number of  
274 inference time intervals is three, and the inferred demographic history is highly similar  
275 with that with four inference time intervals. Thus, the inferred demographic histories are  
276 robust to the threshold of 20%.

277

## 278 **Alternative hypotheses of the super bottleneck**

279 In this study, the super bottleneck is detected in all the 10 African populations, but  
280 not in all the 40 non-African populations. Two alternative hypotheses were explored.  
281 First, the super bottleneck was a false positive result due to positive selection. However,  
282 FitCoal did not falsely estimate a bottleneck due to the existence of positive selection  
283 (Fig. S5). Besides all the 40 non-African populations could also be affected by positive  
284 selection, but no super bottleneck was found. Thus it is unlikely that the bottleneck is a  
285 false positive bias introduced by positive selection. Second, the super bottleneck could  
286 occur in the African populations after the non-African populations were derived. This  
287 requires that the African and non-African populations diverged before 1,000 kyr ago,  
288 which makes the hypothesis impossible. Therefore, the super bottleneck is shared by  
289 African and non-African populations.

290

## 291 **Loss of genetic diversity due to the super bottleneck**

292 To measure the loss of current human genetic diversity due to the super bottleneck,  
293 we calculated the expected tree length of demographic histories with or without the super  
294 bottleneck. It was straightforward to ignore a bottleneck with instantaneous size changes,  
295 thus we considered seven 1000GP African populations (ACB, ASW, ESN, GWD, LWK,  
296 MSL and YRI) and one HGDP-CEPH African population (Yoruba). To remove the  
297 bottleneck, we replaced the population size during the super bottleneck with that after the  
298 bottleneck. We then compared the expected tree length of inferred demographic history  
299 ( $\omega_1$ ) with that of demographic history without the bottleneck ( $\omega_0$ ).

300 The loss of current genetic diversity due to the super bottleneck is  $(\omega_0 - \omega_1)/\omega_0$ .  
301 When the actual sample size was used for each population, the genetic diversity was  
302 measured as Watterson's  $\theta$ . The genetic diversity loss of these eight populations was  
303 46.22% and the range was 32.17–60.56%.

304 When  $n = 2$ , the genetic diversity was measured as  $\pi$ , the pairwise nucleotide  
305 diversity. The loss of current genetic diversity in these eight populations was 65.85% and  
306 the range was 52.71–73.60%. It was larger than the estimate based on Watterson's  $\theta$   
307 because the bottleneck was ancient and the recovery rate of Watterson's  $\theta$  was faster than

308 that of  $\pi^8$ . These results demonstrate the importance of the super bottleneck in the human  
 309 evolution.

310

## 311 **The super bottleneck estimated in Africans**

312 In this section, we explored why the super bottleneck can only be estimated in the  
 313 African population and provided the mathematical explanation. We proved that the  
 314 inferred number of intervals before time  $t$  depends on the dimension of the SFS before  
 315 time  $t$ .

316 Denote the probability of state  $l$  at time  $t$  from  $n$  samples by  $p_l^n(t)$ , where  $l =$   
 317  $2, \dots, n$ . And denote the expected brach length of size  $i$  from  $n$  samples by  $BL_i^n(N(\cdot))$ ,  
 318 where  $i = 1, \dots, n - 1$ . There exists an invertible matrix  $\mathcal{X} = (x_g^h)_{g,h=2,\dots,n}$  which only  
 319 depends on  $n$ , such that  $p_l^n(t) = \sum_{g=2}^n x_g^l p_g^g(t)$  (ref.<sup>9,10</sup>). If positive numbers  $m < n$ ,  
 320 there exist a matix  $\mathcal{Y} = (y_g^h)_{g=2,\dots,m,h=2,\dots,n}$ , which only depends on  $m$  and  $n$ , such that  
 321  $p_l^m(t) = \sum_{h=2}^n y_l^h p_h^n(t)$ . Combined with eq(1), there exist a matrix  
 322  $\mathcal{Z} = (z_g^h)_{g=1,\dots,m-1,h=1,\dots,n-1}$ , which only depends on  $m$  and  $n$ , such that  $BL_i^m(N(\cdot)) =$   
 323  $\sum_{j=1}^{n-1} z_i^j BL_j^n(N(\cdot))$ .

324 Define the population size before time  $t$  by  $N^t(s) = N(t + s)$ . Denote the expected  
 325 branch length of state  $l$  before time  $t$  by  $B_l(t) = (b_{1,l}(t), \dots, b_{l-1,l}(t))$ , where  $b_{i,l}(t)$   
 326 represent the expected branch length of state  $l$  before time  $t$  of type  $i$  at time  $t$ . We have  
 327  $b_{j,l}(t) = p_l^n(t) BL_j^l(N^t(\cdot))$ .  $BL_{i,k}^t$  ( $i = 1, \dots, n - 1$ ) denote the branch length of type  $i$   
 328 whose number of lineages are no more than  $k$  before time  $t$ . We have

$$329 \quad BL_{i,k}^t = \sum_{l=2}^k \sum_{j=1}^{l-1} \frac{p^{(j \rightarrow i)} p^{(l-j \rightarrow n-i)}}{p^{(l \rightarrow n)}} b_{j,l}(t),$$

$$330 \quad \text{where } p(a \rightarrow b) = \begin{cases} \binom{b-1}{a-1} & b \geq a \geq 1 \\ 0 & \text{else} \end{cases}.$$

331 Then,

$$\begin{aligned}
& BL_{i,k}^t \\
&= \sum_{l=2}^k \sum_{j=1}^{l-1} \frac{p(j \rightarrow i) p(l-j \rightarrow n-i)}{p(l \rightarrow n)} b_{j,l}(t) \\
&= \sum_{l=2}^k \sum_{j=1}^{l-1} \frac{p(j \rightarrow i) p(l-j \rightarrow n-i)}{p(l \rightarrow n)} p_l^n(t) BL_j^l(N^t(\cdot)) \\
&= \sum_{h=1}^{k-1} \left( \sum_{l=2}^k \sum_{j=1}^{l-1} \frac{p(j \rightarrow i) p(l-j \rightarrow n-i)}{p(l \rightarrow n)} p_l^n(t) z_j^h \right) BL_h^k(N^t(\cdot))
\end{aligned}$$

332 Thus, the space that is generated by  $BL_{1,k}^t, \dots, BL_{n-1,k}^t$  can be generated by  $BL_1^k(N^t(\cdot)),$   
333  $\dots, BL_{k-1}^k(N^t(\cdot))$ . This leads that the dimension of  $(BL_{i,k}^t)_{i=1, \dots, n-1}$  is no more than  
334  $(k - 1)$ .

335 If the number of ancestral lineages is no more than  $k$  before a given standard  
336 coalescent time  $t$ , the number of inference time intervals should be no more than  $(k - 1)$   
337 before time  $t$  in the inferred demographic history without overfitting. Technically  
338 speaking, if a high proportion of the number of ancestral lineages is no more than  $k$   
339 before a given standard coalescent time  $t$ , we have the same conclusion because it is an  
340 inferred demographic history.

341 For the non-African populations, when  $t = 1.0$ , the number of ancestral lineages is  
342 no more than three in more than 90% cases (Table S18), indicating the power to infer an  
343 constant size model (with one inference time interval), an expansion or contraction (with  
344 two inference time intervals) beyond this time point. The end time of the super bottleneck  
345 is 813 (772–864) kyr ago and the corresponding standard coalescent time is larger than  
346 1.0 for all non-African populations (Fig. 3c, 3f). Therefore, the super bottleneck cannot  
347 be inferred in this case since the bottleneck contains three inference time intervals.

348

## 349 **Confounding factors of bottleneck**

350 African populations have complex population structure<sup>11-14</sup>, and a complex  
351 population structure model is proposed for African and European populations<sup>12</sup> (Fig. S31).  
352 To address the effects of population structure, we simulated data for a western rainforest  
353 hunter-gatherer (wRHG) and a western farmer (wARG) population and estimated their  
354 demographic histories (Fig. S31). Due to frequent migrations, a larger recent population  
355 size is estimated for both populations. However, the ancient population size (14,427) is  
356

357 accurately inferred for both populations (14,493 and 14,428). Thus, the super bottleneck  
358 is not due to the complex African population structure.

359 To consider the effects of archaic introgression from ghost populations<sup>15,16</sup>, we  
360 examined different models by assuming that introgression happened in different time  
361 periods with different migration rates (Fig. S32). Results show that archaic introgression  
362 does not result in an ancient super bottleneck.

363 Truncated SFS was used in demography inference in this study. To examine the  
364 effects of SFS truncation, the FitCoal inference was re-performed by taking the full SFSs  
365 that include high-frequency derived mutations. Again, the super bottleneck is revealed  
366 only in the African populations, but not in the non-African populations (Fig. S33, S34).  
367 Therefore, the ancient super bottleneck is not due to the effects of SFS truncation.

368

## 369 **Computational performance**

370 We compared the performance of the FitCoal with or without tabulation. We applied  
371 them to analyze the data of YRI population by fixing four inference time intervals and  
372 allowing instantaneous population size change. The former is much faster than the latter  
373 (1 second vs 36.2 hours).

374

## 375 **Models and simulation commands for Fig. S35**

376 We simulated trees for 10 sequences with 1,000,000 replications using the ms  
377 software<sup>17</sup> to calculate the average branch length for each SFS type. In this section, time  
378 is scaled by  $4N_0$  generations and the population size is scaled by  $N_0$  when using the ms  
379 software.

380 1. Constant size model (Fig. S35a)

381 The corresponding ms command is

382 `ms 10 1000000 -L -T`

383 2. Exponential growth model (Fig. S35b)

384 We assumed an ancient population size of 0.5, and the population began an exponential  
385 growth at time of 0.17328679513998632 to the current size of 1.0. The corresponding ms  
386 command is

387 ms 10 1000000 -G 4.0 -eN 0.17328679513998632 0.5 -L -T

388 3. Bottleneck model (Fig. S35c)

389 We assumed a population size of 1.0 and a population size of 0.5 during time of 0.1 and  
390 0.25. The corresponding ms command is

391 ms 10 1000000 -eN 0.1 0.5 -eN 0.25 1.0 -L -T

392 4. Complex model (Fig. S35d)

393 We assumed an ancient population size of 0.5. The population experienced a bottleneck  
394 with population size decreasing to 0.2 from time of 0.11465735902799726 to

395 0.08465735902799726 and growing exponentially to the current size of 1.0. The

396 corresponding ms command for the simulation is

397 ms 10 1000000 -G 20.0 -eN 0.03465735902799726 0.5 -eN 0.08465735902799726 0.2 -  
398 eN 0.11465735902799726 0.5 -L -T

399

## 400 **Models and simulation commands for Table S15**

401 To ensure the accuracy of FitCoal, we compared the expected branch length of  
402 FitCoal ( $n = 10$ ) with Zivković-Wiehe's method<sup>2</sup> that is a numerical calculation method  
403 for piecewise constant model with at most three inference time intervals. In this section,  
404 time is scaled by  $4N_0$  generations and the population size is scaled by  $N_0$  because of the  
405 requirement of Zivković-Wiehe's method.

406 1. Constant size model

407 The corresponding input parameters of Zivković-Wiehe's method are

408 unfoldedfreq[10, 0.0, 0.0, 1.0, 1.0]

409 2. Instantaneous growth model

410 We assumed a current population size of 1.0 and an ancient population size of 0.5 before  
411 time 0.5. The corresponding input parameters of Zivković-Wiehe's method are

412 unfoldedfreq[10, 0.5, 0.0, 0.5, 0.5]

413 3. Bottleneck model

414 We assumed a population size of 1.0 and a population size of 0.5 during time of 0.1 and  
415 0.25. The corresponding input parameters of Zivković-Wiehe's method are

416 unfoldedfreq[10, 0.2, 0.6, 0.5, 1]

417



## 418 **Models for verifying the accuracy of FitCoal**

419 If not specified, we used a default mutation rate  $\mu$  of  $1.2 \times 10^{-8}$  per base per  
420 generation and a recombination rate  $r = 0.8\mu$ . All models were simulated with 200  
421 replications using ms<sup>17</sup> or MaCS<sup>18</sup>. In this section, time is scaled by  $4N_0$  generations and  
422 the population size is scaled by  $N_0$  because of the requirement of simulation softwares.

423 1. Constant size model (Fig. 2a, S3a, S14a and S15a)

424 We assumed the effective population size of 10,000. And 30 sequences of 10 Mb  
425 were simulated. The corresponding ms command is

```
426 ms 30 200 -t 4800 -r 3800 10000000
```

427 2. Instantaneous increase model (Fig. 2b, S3b, S14b and S15b)

428 We used this model to mimic the demography of an African population<sup>19</sup>. We  
429 assumed the ancient population size of 7,778 and the current population size of 25,636  
430 and the population began an instantaneous increase at 6,809 generations ago. 30  
431 sequences of 10 Mb were simulated. The corresponding ms command for the simulation  
432 is

```
433 ms 30 200 -t 12310 -r 9750 10000000 -eN 0.066 0.3
```

434 3. PSMC “standard” model (Fig. 2c, S3c, S14c and S15c)

435 This model was based on the “standard simulation” model in PSMC publication<sup>20</sup>.  
436 170 sequences of 30Mb were simulated. The corresponding MaCS command for this  
437 simulation is

```
438 macs 170 30000000 -i 200 -h 1e3 -t 0.002732 -r 0.002179 -h 1e3 -eN 0.01 0.05 -eN  
439 0.0375 0.5 -eN 1.25 1
```

440 4. Exponential growth model I (Fig. 2d, S3d, S14d and S15d)

441 We assumed the current population size of 50,000 and a growth rate  $r = 0.004$ . 30  
442 sequences of 10 Mb were simulated. The corresponding ms command for the simulation  
443 is

```
444 ms 30 200 -t 24000 -r 19000 10000000 -G 800
```

445 5. Exponential growth model II (Fig. 2e, S3e, S14e and S15e)

446 We used this model to mimic the demography of a European populations<sup>21</sup>. We  
447 assumed the ancient population size of 1,000 and the current population size of 29,525

448 and the population began exponential growth at 848 generations ago. 30 sequences of 10  
449 Mb were simulated. The corresponding ms command for the simulation is

```
450 ms 30 200 -t 14172 -r 10629 10000000 -G 472.4 -eN 0.00718 0.0339
```

451 6. Exponential growth model III (Fig. 2f, S3f, S14f and S15f)

452 We assumed the ancient population size of 8,000. The population experienced an  
453 instantaneous decrease to 7,900 and then began exponentially growth to 900,000. 30  
454 sequences of 10 Mb were simulated. The corresponding ms command for the simulation  
455 is

```
456 ms 30 200 -t 432000 -r 340000 10000000 -G 46368 -eN 0.0001027 0.008889
```

457 7. PSMC “sim-YH” model (Fig. S4a and S16a)

458 This model was based on the “sim-YH” model in the PSMC publication<sup>20</sup>. 170  
459 sequences of 30 Mb were simulated. The corresponding MaCS command for the  
460 simulation is

```
461 macs 170 30000000 -i 200 -h 1e3 -t 0.002171 -r 0.001731 -eN 0.0055 0.0832 -eN 0.0089  
462 0.0489 -eN 0.0130 0.0607 -eN 0.0177 0.1072 -eN 0.0233 0.2093 -eN 0.0299 0.3630 -eN  
463 0.0375 0.5041 -eN 0.0465 0.5870 -eN 0.0571 0.6343 -eN 0.0695 0.6138 -eN 0.0840  
464 0.5292 -eN 0.1010 0.4409 -eN 0.1210 0.3749 -eN 0.1444 0.3313 -eN 0.1718 0.3066 -eN  
465 0.2040 0.2952 -eN 0.2418 0.2915 -eN 0.2860 0.2950 -eN 0.3379 0.3103 -eN 0.3988  
466 0.3458 -eN 0.4701 0.4109 -eN 0.5538 0.5048 -eN 0.6520 0.6520 -eN 0.7671 0.6440 -eN  
467 0.9020 0.6178 -eN 1.0603 0.5345 -eN 1.4635 1.7931
```

468 8. PSMC “sim-1” model (Fig. S4b and S16b)

469 This model was based on the “sim-1” model in the PSMC publication<sup>20</sup>. 170  
470 sequences of 30 Mb were simulated. The corresponding MaCS command for the  
471 simulation is

```
472 macs 170 30000000 -i 200 -h 1e3 -t 0.001 -r 0.0008 -eN 0.01 0.1 -eN 0.06 1 -eN 0.2 0.5 -  
473 eN 1 1 -eN 2 2
```

474 9. PSMC “sim-2” model (Fig. S4c and S16c)

475 This model was based on the “sim-1” model in the PSMC publication<sup>20</sup>. 170  
476 sequences of 30 Mb were simulated. The corresponding MaCS command for the  
477 simulation is

478 macs 170 30000000 -i 200 -h 1e3 -t 0.0001 -r 0.00008 -eN 0.1 5 -eN 0.6 20 -eN 2 5 -eN  
479 10 10 -eN 20 5

480 10. PSMC “sim-3” model (Fig. S4d and S16d)

481 This model was based on the “sim-1” model in the PSMC publication<sup>20</sup>. 170  
482 sequences of 30 Mb were simulated. The corresponding MaCS command for the  
483 simulation is

484 macs 170 30000000 -i 200 -h 1e3 -t 0.002 -r 0.0016 -eN 0.01 0.05 -eN 0.0150 0.5 -eN  
485 0.05 0.25 -eN 0.5 0.5

486 11. Complicated model III (Fig. S4e and S16e)

487 We assumed the ancient population size of 4,167. The population experienced an  
488 instantaneous increase to 20,833 at 33,333 generations ago, an instantaneous decrease to  
489 2,083 at 2,500 generations ago and an instantaneous increase to 41,667 at 833 generations  
490 ago. 170 sequences of 30 Mb were simulated. The corresponding MaCS command for the  
491 simulation is

492 macs 170 30000000 -i 200 -h 1e3 -t 0.002 -r 0.0016 -eN 0.005 0.05 -eN 0.0150 0.5 -eN  
493 0.2 0.1

494 12. Complicated model II (Fig. S4f and S16f)

495 We assumed the ancient population size of 1,250. The population experienced an  
496 instantaneous increase to 33,333 at 33,333 generations ago, an instantaneous decrease to  
497 12,500 at 16,667 generations ago, an instantaneous increase to 20,833 at 8,333  
498 generations ago, an instantaneous decrease to 8,333 at 4,167 generations ago, an  
499 instantaneous decrease to 2,083 at 1,667 generations ago and an instantaneous increase to  
500 41,667 at 833 generations ago. 170 sequences of 30 Mb were simulated. The  
501 corresponding MaCS command for the simulation is

502 macs 170 30000000 -i 200 -h 1e3 -t 0.002 -r 0.0016 -eN 0.005 0.05 -eN 0.01 0.2 -eN  
503 0.0250 0.5 -eN 0.05 0.3 -eN 0.1 0.8 -eN 0.2 0.03

504 13. Exponential growth model IV (Fig. S4g and S16g)

505 We assumed the ancient population size of 20,000. The population experienced an  
506 instantaneous decrease to 1,000 at 4,000 generations ago, and began exponential growth  
507 to 20,000 at 2,000 generations ago. 170 sequences of 30 Mb were simulated. The  
508 corresponding MaCS command for the simulation is

509 macs 170 30000000 -i 200 -h 1e3 -t 0.001 -r 0.0008 -G 120 -eG 0.025 0 -eN 0.05 1

510 14. Exponential growth model V (Fig. S4h and S16h)

511 We assumed the ancient population size of 15,000. The population experienced an  
512 instantaneous decrease to 6,000 at 4,000 generations ago, and began exponential growth  
513 to 30,000 at 2,000 generations ago. 170 sequences of 30 Mb were simulated. The  
514 corresponding MaCS command for the simulation is

515 macs 170 30000000 -i 200 -h 1e3 -t 0.00144 -r 0.00115 -G 96.37 -eG 0.0167 0 -eN 0.033  
516 0.5

517 15. Exponential growth model VI (Fig. S4i and S16i)

518 We assumed the ancient population size of 15,000. The population experienced an  
519 exponential decrease to 6,000 at 5,000 generations ago, and began exponential growth to  
520 30,000 at 2,000 generations ago. 170 sequences of 30 Mb were simulated. The  
521 corresponding ms command for the simulation is

522 ms 170 100 -t 1440 -r 1152 1000000 -G 96.56627474604602 -eG 0.016666666666667 -  
523 36.65162927 -eN 0.041666666666667 0.5

524 16. Split model I (Fig. S17a)

525 We used this model to mimic the split demography of African hunter-gatherer and  
526 agriculturist populations. We assumed the ancient population size of 20,833. The ancient  
527 population splits into two subpopulation at 6,667 generations ago. Population 1  
528 experienced an instantaneous increase to 41,667 at 500 generations ago, and population 2  
529 experienced an instantaneous decline to 8,333 at 1,250 generations ago. 170 sequences of  
530 30 Mb were simulated. The corresponding MaCS command for the simulation is

531 macs 340 30000000 -i 1 -h 1e3 -t 0.002 -r 0.0016 -I 2 170 170 4 -n 2 0.2 -en 0.003 1 0.5 -  
532 en 0.0075 2 0.5 -ej 0.04 2 1

533 17. Split model II (Fig. S17b)

534 We used this model to mimic the split demography of African and European  
535 populations. We assumed the ancient population size of 20,833. The ancient population  
536 split into two subpopulation at 5,000 generations ago and the population size of  
537 population 1 became 83,303. Then, population 1 experienced an instantaneous increase to  
538 20,833 at 833 generations ago. Population 2 experienced an instantaneous increase to

539 41,667 at 500 generations ago. 170 sequences of 30 Mb were simulated. The  
540 corresponding MaCS command for the simulation is  
541 macs 340 30000000 -i 1 -h 1e3 -t 0.004 -r 0.0032 -I 2 170 170 4 -n 2 0.5 -en 0.0015 2  
542 0.25 -en 0.0025 1 0.1 -ej 0.015 1 2

#### 543 18. Split model III (Fig. S17c)

544 We assumed the ancient population size of 4,167. The ancient population  
545 experienced an instantaneous growth to 20,833 at 8,333 generations ago and splits into  
546 two subpopulations at 2,500 generations ago. The population size of population 1  
547 decreased to 2,083 at 1,666 generations ago and increased to 20,833 at 833 generations  
548 ago. The population size of population 2 remained constant. 170 sequences of 100 Mb  
549 were simulated. The corresponding MaCS command for the simulation is  
550 macs 340 1000000 -i 100 -h 1e3 -t 0.001 -r 0.0008 -I 2 170 170 4 -eN 0 1 -en 0.01 1 0.1 -  
551 en 0.02 1 1 -ej 0.03 2 1 -eN 0.10 0.2 -eN 1 1

#### 552 19. Models for studying influence factors of FitCoal (Fig. S2)

553 We simulated variations of the Exponential growth model V by increasing or  
554 decreasing the number of sequences, length of sequences and recombination rate.

555 19.1. Number of sequence  $n = 170$ , sequence length  $L = 1$  Mb, recombination rate  
556  $\rho = 0.8\mu$  (Fig. S2a). The corresponding ms command for the simulation is  
557 ms 170 1 -t 1440 -r 1152 1000000 -G 96.56627474604602 -eN 0.016666666666666666  
558 0.2 -eN 0.033333333333333333 0.5

559 19.2. Number of sequence  $n = 170$ , sequence length  $L = 10$  Mb, recombination rate  
560  $\rho = 0.8\mu$  (Fig. S2b). The corresponding ms command for the simulation is  
561 ms 170 10 -t 1440 -r 11520 1000000 -G 96.56627474604602 -eN  
562 0.016666666666666666 0.2 -eN 0.033333333333333333 0.5

563 19.3. Number of sequence  $n = 170$ , sequence length  $L = 100$  Mb, recombination rate  
564  $\rho = 0.8\mu$  (Fig. S2c, S2f and S2h). The corresponding ms command for the simulation is  
565 ms 170 100 -t 14400 -r 11520 10000000 -G 96.56627474604602 -eN  
566 0.016666666666666666 0.2 -eN 0.033333333333333333 0.5

567 19.4. Number of sequence  $n = 10$ , sequence length  $L = 100$  Mb, recombination rate  
568  $\rho = 0.8\mu$  (Fig. S2d). The corresponding ms command for the simulation is

569 ms 10 100 -t 14400 -r 11520 10000000 -G 96.56627474604602 -eN  
570 0.016666666666666666 0.2 -eN 0.033333333333333333 0.5

571 19.5. Number of sequence  $n = 100$ , sequence length  $L = 100$  Mb, recombination rate  
572  $\rho = 0.8\mu$  (Fig. S2e). The corresponding ms command for the simulation is

573 ms 100 100 -t 14400 -r 11520 10000000 -G 96.56627474604602 -eN  
574 0.016666666666666666 0.2 -eN 0.033333333333333333 0.5

575 19.6. Number of sequence  $n = 170$ , sequence length  $L = 100$  Mb, recombination rate  
576  $\rho = 0.1\mu$  (Fig. S2g). The corresponding ms command for the simulation is

577 ms 170 100 -t 14400 -r 1440 10000000 -G 96.56627474604602 -eN  
578 0.016666666666666666 0.2 -eN 0.033333333333333333 0.5

579 19.7. Number of sequence  $n = 170$ , sequence length  $L = 100$  Mb, recombination rate  
580  $\rho = 10\mu$  (Fig. S2i). The corresponding ms command for the simulation is

581 ms 170 100 -t 14400 -r 144000 10000000 -G 96.56627474604602 -eN  
582 0.016666666666666666 0.2 -eN 0.033333333333333333 0.5

## 583 20. Models for studying the super bottleneck

584 For 1000GP, we used recent population expansion parameters of YRI and CHB to  
585 represent the recent population expansion for African and non-African population,  
586 respectively. Then, we used approximate average value of parameters inferred from  
587 African and non-African populations to represent other parameters of corresponding  
588 models.

589 For HGDP-CEPH, we used recent population expansion parameters of Yoruba and  
590 Han to represent the recent population expansion for African and non-African population,  
591 respectively. Then, we used approximate average value of parameters inferred from  
592 African except Biaka and non-African populations to represent other parameters of  
593 corresponding models. Because of the difference of ancient demography between Biaka  
594 and other African populations, we did not take it into consideration.

595 For idealized models, we fine-tuned parameters so that all parameters had a standard  
596 coalescent time smaller than 2.0.

### 597 20.1. Bottleneck I model for 1000GP (Fig. 4a and 4b)

598 We used this model to mimic the demography of African populations. We assumed  
599 the ancient population size of 96,000. The population experienced an instantaneous

600 decrease to 1,600 at 39,000 generations ago, an instantaneous growth to 27,000 at 32,500  
601 generations ago and began exponential growth to 160,000 at 200 generations ago. 202  
602 sequences of 800 Mb were simulated. The corresponding ms command for the simulation  
603 is

```
604 ms 202 80000 -t 76.8 -r 61.43 10000 -G 5693.878237534393 -eN 3.125E-4 0.16875 -eN  
605 0.05078125 0.01 -eN 0.0609375 0.6
```

606 20.2. Bottleneck II model for 1000GP (Fig. 4c)

607 We used this model to mimic the estimated demography of non-African populations.  
608 We assumed the ancient population size of 20,000. The population experienced an  
609 exponential decrease to 6,000 at 20,000 generations ago and began exponential growth to  
610 250,000 at 1,000 generations ago. 202 sequences of 800 Mb were simulated. The  
611 corresponding ms command for the simulation is

```
612 ms 200 80000 -t 120 -r 96 10000 -G 3729.7014486341914 -eN 0.001 0.024 -eG 0.001 -  
613 63.36698970136505 -eN 0.02 0.08
```

614 20.3. Bottleneck III model for 1000GP (Fig. 4d)

615 We used this model to mimic the real demography of non-African populations. We  
616 assumed the ancient population size of 96,000. The population experienced an  
617 instantaneous decrease to 1,600 at 39,000 generations ago, an instantaneous growth to  
618 27,000 at 32,500 generations ago. Then, the population began exponential decline to  
619 6,000 at 24,735 generations ago and instantaneously increased to 250,000 at 1,000  
620 generations ago. 200 sequences of 800 Mb were simulated. The corresponding ms  
621 command for the simulation is

```
622 ms 200 80000 -t 120 -r 96 10000 -G 3729.7014486341914 -eN 0.001 0.024 -eG 0.001 -  
623 63.36959750479352 -eN 0.024735 0.108 -eN 0.0325 0.0064 -eN 0.039 0.384
```

624 20.4. Bottleneck IV model for HGDP-CEPH (Fig. S8a and S8b)

625 We used this model to mimic the demography of African populations. We assumed  
626 the ancient population size of 120,000. The population experienced an instantaneous  
627 decrease to 1,400 at 41,000 generations ago, an instantaneous growth to 28,000 at 35,000  
628 generations ago and began instantaneous growth to 50,000 at 500 generations ago. 44  
629 sequences of 800 Mb were simulated. The corresponding ms command for the simulation  
630 is

631 ms 44 80000 -t 24 -r 19.19 10000 -eN 0.0025 0.56 -eN 0.175000000000000002 0.028 -eN  
632 0.205 2.4

633 20.5. Bottleneck V model for HGDP-CEPH (Fig. S8c)

634 We used this model to mimic the estimated demography of non-African populations.  
635 We assumed the ancient population size of 21,000. The population experienced an  
636 exponential decrease to 6,000 at 20,000 generations ago and began exponential growth to  
637 300,000 at 1,000 generations ago. 56 sequences of 800 Mb were simulated. The  
638 corresponding ms command for the simulation is

639 ms 56 80000 -t 144 -r 115.19 10000 -G 4694.427606513776 -eN 8.333333333333333E-4  
640 0.02 -eG 8.333333333333333E-4 -79.1218716944443 -eN 0.016666666666666666 0.07

641 20.6. Bottleneck VI model for HGDP-CEPH (Fig. S8d)

642 We used this model to mimic the real demography of non-African populations. We  
643 assumed the ancient population size of 120,000. The population experienced an  
644 instantaneous decrease to 1,400 at 41,000 generations ago, an instantaneous growth to  
645 25,000 at 35,000 generations ago. Then, the population began exponential decline to  
646 6,000 at 24,363 generations ago and instantaneously increased to 300,000 at 1,000  
647 generations ago. 56 sequences of 800 Mb were simulated. The corresponding ms  
648 command for the simulation is

649 ms 56 80000 -t 144 -r 115.19 10000 -G 4694.427606513776 -eN 8.333333333333333E-4  
650 0.02 -eG 8.333333333333333E-4 -79.12228948065652 -eN 0.0203025  
651 0.09333333333333334 -eN 0.029166666666666667 0.004666666666666667 -eN  
652 0.034166666666666665 0.4

653 20.7. Bottleneck VII model for idealized models (Fig. S9a and S9b)

654 We used this model to mimic the demography of African populations. We assumed  
655 the ancient population size of 30,000. The population experienced an instantaneous  
656 decrease to 3,000 at 35,000 generations ago, an instantaneous growth to 30,000  
657 generations ago. 170 sequences of 800 Mb were simulated. The corresponding ms<sup>17</sup>  
658 command for the simulation is

659 ms 170 800 -t 1440 -r 1152 1000000 -eN 0.25 0.1 -eN 0.291667 1

660 20.8. Bottleneck VIII model for idealized models (Fig. S9c)



661 We used this model to mimic the estimated demography of non-African populations.  
662 We assumed the ancient population size of 20,000. The population experienced an  
663 exponential decrease to 6,000 at 20,000 generations ago and began exponential growth to  
664 300,000 at 1,000 generations ago. 170 sequences of 800 Mb were simulated. The  
665 corresponding ms command for the simulation is  
666 ms 170 800 -t 14400 -r 11520 1000000 -G 4694.427606513776 -eN 0.00083333 0.02 -eG  
667 0.00083333 -101.6487102589958 -eN 0.016666666666666666 0.1  
668 20.9. Bottleneck IX model for idealized models (Fig. S9d)

669 We used this model to mimic the real demography of non-African populations. We  
670 assumed the ancient population size of 30,000. The population experienced an  
671 instantaneous decrease to 3,000 at 35,000 generations ago, an instantaneous growth to  
672 30,000 at 30,000 generations ago. Then, the population began exponential decline to  
673 6,000 at 20,000 generations ago and instantaneously increased to 300,000 at 1,000  
674 generations ago. 170 sequences of 800 Mb were simulated. The corresponding ms  
675 command for the simulation is  
676 ms 170 800 -t 14400 -r 11520 1000000 -G 4694.427606513776 -eN 0.00083333 0.02 -eG  
677 0.00083333 -101.6487102589958 -eN 0.016666666666666666 0.1 -eN 0.025 0.01 -eN  
678 0.0291667 0.1

## 679 21. Models for estimating confidence interval

680 1000GP populations (Fig. S18 – S22):

681 ACB:

682 ms 192 80000 -t 37.7251200000000004 -r 30.1800960000000002 10000 -G  
683 307.97400639367373 -eN 0.0033742698361377437 0.35374201592996923 -eN  
684 0.10237507717670723 0.012990813548107999 -eN 0.1132253281877044  
685 0.9123469984986132

686 ASW:

687 ms 122 80000 -t 26.50224 -r 21.201792 10000 -G 56.10026737541272 -eN  
688 0.01390929179691329 0.4582616412801333 -eN 0.1538498233982067  
689 0.013891655950591346 -eN 0.16560167778269375 1.3718870555847353

690 BEB:

691 ms 172 80000 -t 62.65536 -r 50.124288 10000 -G 1215.8971532452542 -eN  
692 0.0023403111314833293 0.058100695614868386 -eG 0.0023403111314833293 -  
693 30.907477873075123 -eN 0.03371108514231231 0.15320381209205405  
694 CDX:  
695 ms 186 80000 -t 25.248 -r 20.1984 10000 -G 495.40037108442965 -eN  
696 0.004604646549934852 0.10216730038022814 -eG 0.004604646549934852 -  
697 17.489419084798488 -eN 0.0835118490009135 0.4061216730038023  
698 CEU:  
699 ms 198 80000 -t 76.50768000000001 -r 61.206144 10000 -G 3486.9981711123683 -eN  
700 8.189396733027973E-4 0.057518931432765964 -eN 0.01896877424771246  
701 0.1280749854132291  
702 CHB:  
703 ms 206 80000 -t 148.45488 -r 118.763904 10000 -G 7477.99792685936 -eN  
704 5.168378866508531E-4 0.020964753735276336 -eN 0.006336402867008054  
705 0.06404208470614102  
706 CHS:  
707 ms 210 80000 -t 87.9024 -r 70.32192 10000 -G 4112.853998070424 -eN  
708 8.149360963103421E-4 0.03502429967782449 -eN 0.011161187141954527  
709 0.1114290394801507  
710 CLM:  
711 ms 188 80000 -t 26.05104 -r 20.840832 10000 -eN 0.006899708256449607  
712 0.17470933981906286 -eN 0.04654813479653858 0.35472518563558303  
713 ESN:  
714 ms 198 80000 -t 32.99376 -r 26.395008 10000 -G 1399.7970544542743 -eN  
715 6.732730258474137E-4 0.38967368375110933 -eN 0.11907424073256923  
716 0.025241136505812008 -eN 0.14645778743979765 1.6907342479305179  
717 FIN:  
718 ms 198 80000 -t 21.88368 -r 17.506944 10000 -G 1545.9307685858762 -eN  
719 0.0010069648928517855 0.21083108508258208 -eN 0.079627651288076  
720 0.4667149218047421  
721 GBR:

722 ms 182 80000 -t 68.96448 -r 55.171584 10000 -G 4780.2465803320365 -eN  
723 4.8660205464359964E-4 0.09767810907876055 -eG 4.8660205464359964E-4  
724 299.83121839376906 -eN 0.0026469357311387233 0.051108048665051926 -eG  
725 0.0026469357311387233 -38.53061553796807 -eN 0.02777287031733699  
726 0.1345666638826248  
727 GIH:  
728 ms 206 80000 -t 22.5384 -r 18.03072 10000 -G 319.3657263289911 -eN  
729 0.005331789062104143 0.18217442231924183 -eG 0.005331789062104143 -  
730 7.108545561599834 -eN 0.1312801904940001 0.4459801938025769  
731 GWD:  
732 ms 226 80000 -t 71.53488 -r 57.227904 10000 -G 2480.4594823364796 -eN  
733 6.955466408858352E-4 0.17812401446678877 -eN 0.055221144353749266  
734 0.008796827505686736 -eN 0.06446476441787029 0.7480725486643718  
735 IBS:  
736 ms 214 80000 -t 101.40288 -r 81.122304 10000 -G 3879.3899843730937 -eN  
737 7.379412692860351E-4 0.05711080395349718 -eN 0.001639355380662806  
738 0.03441322376642557 -eG 0.001639355380662806 -55.51532072601329 -eN  
739 0.019312961005874058 0.09179857613511569  
740 ITU:  
741 ms 204 80000 -t 45.81072 -r 36.648576 10000 -G 942.7096023053382 -eN  
742 0.002494089782323459 0.09525456050461552 -eN 0.026664885830212617  
743 0.2086358826056434  
744 JPT:  
745 ms 208 80000 -t 55.95024 -r 44.760192 10000 -G 3128.7376262633884 -eN  
746 8.114087494514677E-4 0.07897017063733774 -eN 0.002182047525463559  
747 0.04600945411494213 -eG 0.002182047525463559 -42.38616087573135 -eN  
748 0.03372169017138904 0.17515849797963332  
749 KHV:  
750 ms 198 80000 -t 57.9072 -r 46.32576 10000 -G 1588.3658354039515 -eN  
751 0.0019264561851523535 0.04689157824933687 -eG 0.0019264561851523535 -  
752 36.60290382061524 -eN 0.03792001517437307 0.17509118037135277

753 LWK:  
754 ms 198 80000 -t 21.33888 -r 17.0711040000000002 10000 -G 34.458048510849686 -eN  
755 0.014319371341156495 0.6105362605722512 -eN 0.18803659662764166  
756 0.02145942055065683 -eN 0.20879409785416014 2.0908763721432426  
757 MSL:  
758 ms 170 80000 -t 21.25872 -r 17.006976 10000 -G 127.20491855898698 -eN  
759 0.003279354257615819 0.6589220799747115 -eN 0.18195660752091394  
760 0.04585788796315112 -eN 0.23579811421655142 2.9051457472510105  
761 MXL:  
762 ms 128 80000 -t 72.2232 -r 57.77856 10000 -G 1185.9983336956855 -eN  
763 0.0025552519587115612 0.04829030006978367 -eG 0.0025552519587115612 -  
764 35.997766981810344 -eN 0.030770096213141897 0.13333997939720202  
765 PEL:  
766 ms 170 80000 -t 104.52432 -r 83.619456 10000 -G 2449.33558491349 -eN  
767 0.0014410414433505075 0.029316813541575778 -eN 0.01066574560965878  
768 0.09490308092891683  
769 PJL:  
770 ms 192 80000 -t 40.10544 -r 32.084352 10000 -G 658.1508823918153 -eN  
771 0.0035165490125809392 0.09882350125070315 -eG 0.0035165490125809392 -  
772 14.935034208218648 -eN 0.06458715193043525 0.2460234821011813  
773 PUR:  
774 ms 208 80000 -t 23.60832 -r 18.886656 10000 -eN 0.0038497802945414656  
775 0.6750365972674041 -eN 0.014388104698224359 0.1546437865972674 -eG  
776 0.014388104698224359 -15.582101828279491 -eN 0.07286054886643582  
777 0.3846169486011711  
778 STU:  
779 ms 204 80000 -t 34.572 -r 27.6576000000000002 10000 -G 510.43071934664556 -eN  
780 0.004267252624293807 0.11325234293648039 -eN 0.02525451461678291  
781 0.2616869142658799  
782 TSI:

783 ms 214 80000 -t 75.82608 -r 60.6608640000000004 10000 -G 2569.467980386571 -eN  
784 0.0011371059177742527 0.05383899576504548 -eG 0.0011371059177742527 -  
785 19.704497360903815 -eN 0.04986270865479367 0.14062707712175018

786 YRI:

787 ms 216 80000 -t 64.91088 -r 51.928704 10000 -G 4776.570655987927 -eN  
788 3.3888995289779744E-4 0.19814983250881826 -eN 0.0625962626099122  
789 0.007882807936050167 -eN 0.06835272805758985 0.4330589879539455

790

791 HGDP-CEPH populations (Fig. S23 – S28):

792 Adygei:

793 ms 32 80000 -t 19.19712 -r 15.357696 10000 -eN 0.005250411630207267  
794 0.19837975696354454 -eG 0.005250411630207267 -8.596593090355556 -eN  
795 0.11548669953457971 0.5117517627644147

796 Balochi:

797 ms 48 80000 -t 50.9496000000000004 -r 40.75968 10000 -G 623.264941916954 -eN  
798 0.004223024540924805 0.0719299072024118 -eG 0.004223024540924805 -  
799 32.99343443398211 -eN 0.032825823542035906 0.18482264826416694

800 Basque:

801 ms 46 80000 -t 26.1537600000000002 -r 20.923008 10000 -G 751.4700408942055 -eN  
802 0.0025016313707249523 0.15260520858186355 -eG 0.0025016313707249523 -  
803 8.224106050612061 -eN 0.1199670757097625 0.40097637968689775

804 Bedouin:

805 ms 92 80000 -t 36.6220800000000004 -r 29.297664 10000 -G 244.38587570241546 -eN  
806 0.008841200644961786 0.11524850581944007 -eG 0.008841200644961786 -  
807 16.31003863953942 -eN 0.05738997874929217 0.2544039005976722

808 Biaka:

809 ms 44 80000 -t 4.5912 -r 3.6729600000000002 10000 -eN 0.009592435429723692  
810 3.6935703084161005 -eN 0.9319760745921495 0.09492943021432305 -eG  
811 0.9319760745921495 -11.520947944349727 -eN 1.3098356260554107

812 7.379299529534762

813 Brahui:

814 ms 50 80000 -t 36.26112 -r 29.008896 10000 -G 372.4275509762127 -eN  
815 0.006063547988128193 0.10453510536905644 -eG 0.006063547988128193 -  
816 20.411278092113488 -eN 0.05182198032003567 0.26600391824632  
817 Burusho:  
818 ms 48 80000 -t 11.5464 -r 9.23712 10000 -eN 0.015366836965198416  
819 0.29627935980045733 -eG 0.015366836965198416 -8.16350928074288 -eN  
820 0.1408168183093884 0.8250259821242986  
821 Druze:  
822 ms 84 80000 -t 16.18944 -r 12.951552 10000 -G 109.07256817628162 -eN  
823 0.01288215226934864 0.24534511385199242 -eG 0.01288215226934864 -  
824 7.35809820577746 -eN 0.13234063031350007 0.5909037001897534  
825 French:  
826 ms 56 80000 -t 79.18416 -r 63.347328000000005 10000 -G 2198.9359820452387 -eN  
827 0.001348902384433904 0.051501209332775646 -eG 0.001348902384433904 -  
828 24.36290322377743 -eN 0.03939915284814332 0.13014117975110173  
829 Han:  
830 ms 86 80000 -t 159.24816 -r 127.398528 10000 -G 5363.756025025552 -eN  
831 7.370989032405503E-4 0.0191851510246649 -eN 0.005252449909354633  
832 0.05743488653181299  
833 Hazara:  
834 ms 38 80000 -t 12.69792 -r 10.158336 10000 -eN 0.014217614003750299  
835 0.25629394420503515 -eG 0.014217614003750299 -9.884907873225844 -eN  
836 0.12245692270731047 0.7471459892643834  
837 Japanese:  
838 ms 54 80000 -t 33.88464 -r 27.107712 10000 -G 636.5261153273832 -eN  
839 0.004000435354218995 0.07836471038204922 -eG 0.004000435354218995 -  
840 26.629980477176918 -eN 0.0528258276856906 0.2876064198999901  
841 Kalash:  
842 ms 44 80000 -t 3.04608 -r 2.436864 10000 -G -2.415743522809092 -eN  
843 0.47028502523586235 3.1145603529782537  
844 Makrani:

845 ms 50 80000 -t 24.11088 -r 19.288704 10000 -eN 0.00980388240380426  
 846 0.14526885787661006 -eG 0.00980388240380426 -17.111271203295853 -eN  
 847 0.06723955104118398 0.388146761959746  
 848 Mandenka:  
 849 ms 44 80000 -t 13.10688 -r 10.485504 10000 -eN 0.3296277261231593  
 850 0.048304401962938545 -eG 0.3296277261231593 -17.85185708722175 -eN  
 851 0.5825077171252933 4.411191679484362  
 852 Maya:  
 853 ms 42 80000 -t 16.673280000000002 -r 13.338624000000001 10000 -eN  
 854 0.008589230112361738 0.09687356057116536 -eG 0.008589230112361738 -  
 855 25.14802627151756 -eN 0.08111110798113147 0.600155458314141  
 856 Mozabite:  
 857 ms 54 80000 -t 17.42304 -r 13.938432 10000 -G 34.034495761040134 -eN  
 858 0.03302787085100088 0.32494903300457323 -eG 0.03302787085100088 -  
 859 4.504618045303915 -eN 0.1472698871889101 0.543638767976197  
 860 Palestinian:  
 861 ms 92 80000 -t 22.33968 -r 17.871744 10000 -eN 0.008844463035145432  
 862 0.1913151844610129 -eG 0.008844463035145432 -7.866119095624621 -eN  
 863 0.11128708520369861 0.4282675490427795  
 864 Pathan:  
 865 ms 48 80000 -t 42.96432 -r 34.371456 10000 -G 497.59849646988573 -eN  
 866 0.005312881946315924 0.07109899563172419 -eG 0.005312881946315924 -  
 867 47.5703288285576 -eN 0.02861662601453915 0.21543085052899708  
 868 Russian:  
 869 ms 50 80000 -t 22.14048 -r 17.712384 10000 -G 258.609263568537 -eN  
 870 0.006473721471777433 0.1874647704114816 -eN 0.047392730886604  
 871 0.4300394571391406  
 872 Sardinian:  
 873 ms 56 80000 -t 19.90512 -r 15.924096 10000 -G 209.67966756103402 -eN  
 874 0.008361464215634221 0.17321372591574427 -eG 0.008361464215634221 -  
 875 11.622404927783043 -eN 0.09674763618341507 0.48385541006535

876 Sindhi:  
877 ms 48 80000 -t 28.07088 -r 22.456704000000002 10000 -eN 0.006697787857121225  
878 0.12812708401019132 -eG 0.006697787857121225 -17.75301871013936 -eN  
879 0.06131324436460199 0.33785331988167094  
880 Yakut:  
881 ms 50 80000 -t 10.99008 -r 8.792064 10000 -G 107.01050381191519 -eN  
882 0.010397096462590117 0.32870370370370366 -eN 0.09403222060369128  
883 0.8740391334730957  
884 Yoruba:  
885 ms 44 80000 -t 30.6816 -r 24.54528 10000 -G 298.1592873494309 -eN  
886 0.0028204398926000218 0.4313047559449311 -eN 0.1396195363438095  
887 0.026126408010012515 -eN 0.16980043486634022 2.1113579474342927  
888  
889  
890



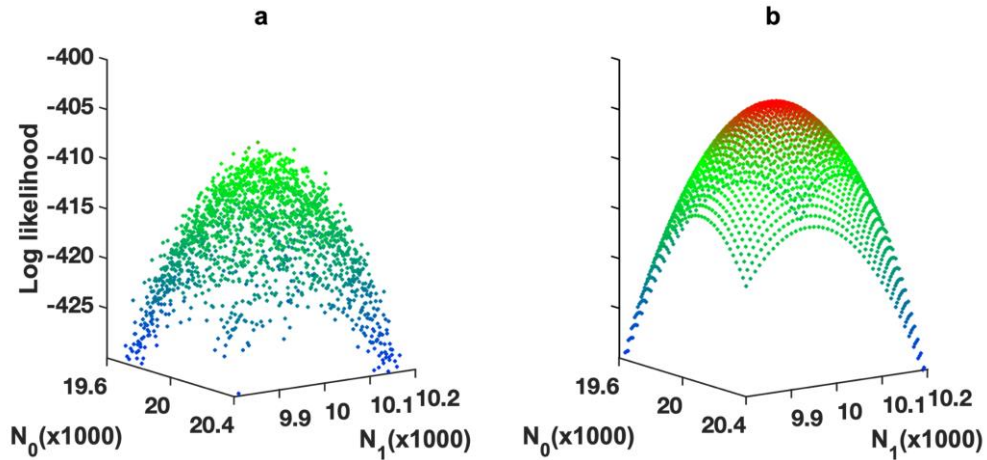

891

892 **Figure S1. Comparison of likelihood surfaces based on simulations and FitCoal.** (a)

893 Likelihood surface of a SFS based on simulation approach. (b) Likelihood surface of the

894 SFS based on FitCoal. The sample size is 100. The SFS is obtained under a demography

895 that the population size increases from 10,000 to 20,000 at standard coalescent time 0.2.

896 The surfaces were obtained conditional on standard coalescent time 0.2 while the current

897 ( $N_0$ ) and the ancestral population size ( $N_1$ ) varied in the instantaneous growth model. Red

898 dots indicate large likelihoods, and blue dots indicate small likelihoods.

899

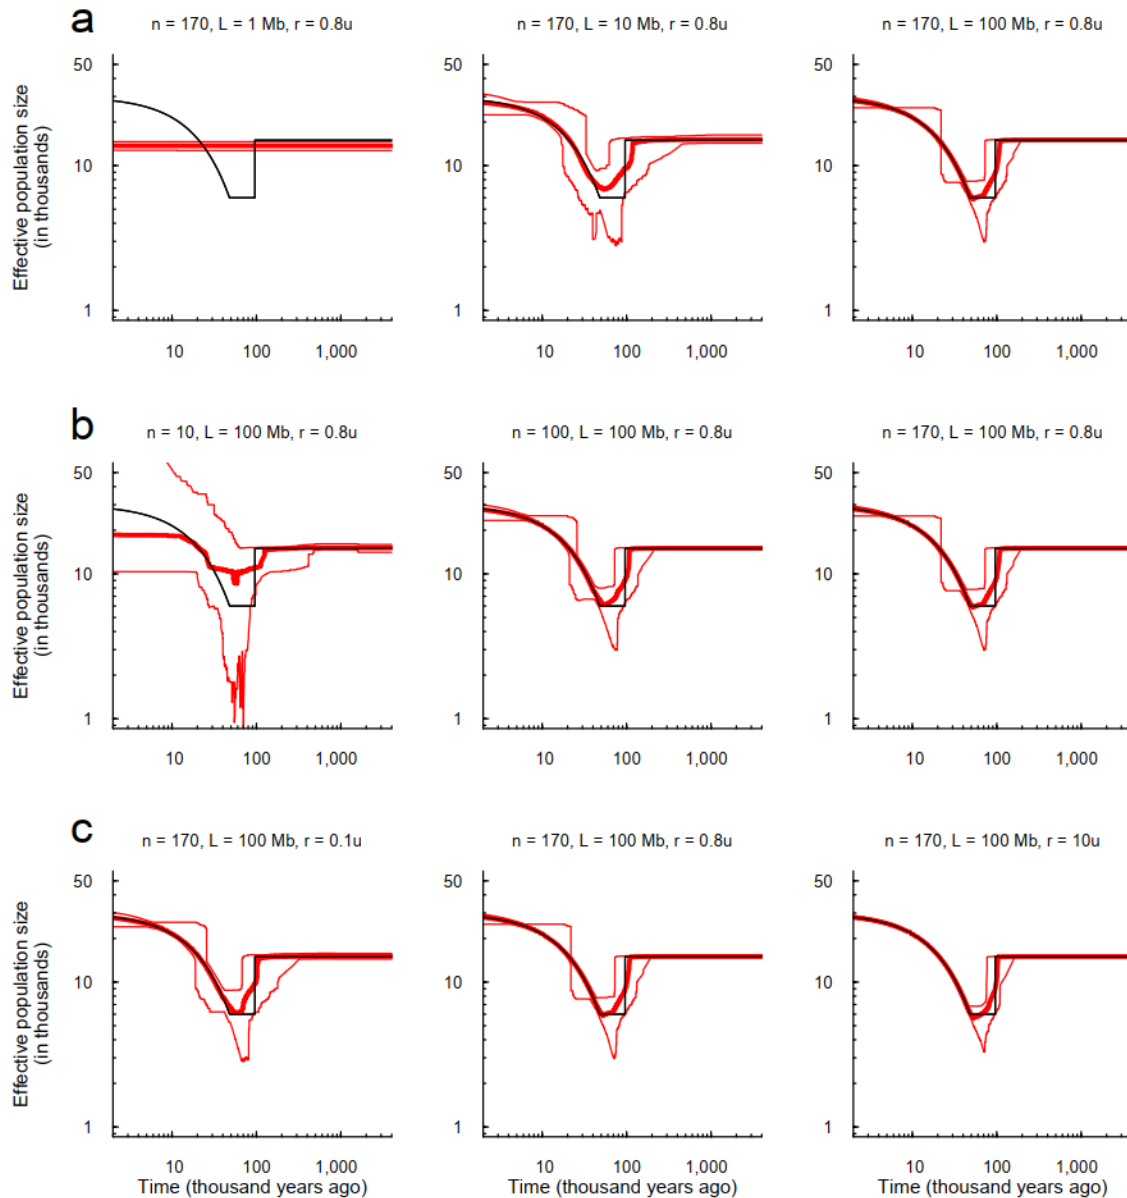

900

901 **Figure S2. Effects of sequence length (a), sample size (b), and recombination rate (c)**

902 **in the FitCoal inference.** Thin black lines indicate true models. Thick red lines are the

903 medians of the estimated histories of FitCoal; thin red lines are 2.5 and 97.5 percentiles of

904 the estimated histories of FitCoal.  $n$  is the number of simulated sequences,  $L$  the length of

905 the simulated sequences, and  $r$  the recombination rate relative to the mutation rate ( $\mu$ ).

906 Other parameters are the same with Figure 2. The corresponding commands for

907 simulations are described above.

908

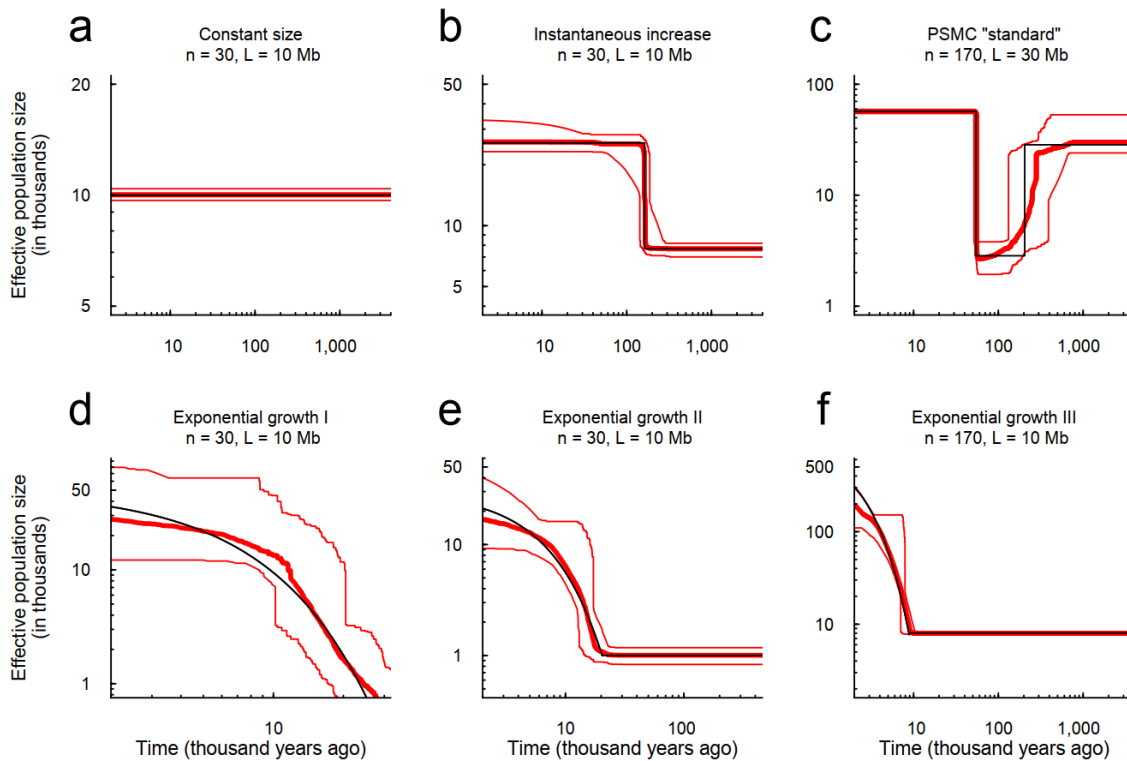

909

910 **Figure S3. Verification of FitCoal accuracy with truncated SFS.** (a) Constant size  
 911 model. (b) Instantaneous increase model. (c) PSMC “standard” model. (d) Exponential  
 912 growth I model. (e) Exponential growth II model. (f) Exponential growth III model. The  
 913 six models are the same as Figure 2. Thin solid black lines indicate true models. Thick  
 914 red lines are the medians of the estimated histories of FitCoal; thin red lines are 2.5 and  
 915 97.5 percentiles of the estimated histories of FitCoal.  $n$  is the number of simulated  
 916 sequences and  $L$  the length of the simulated sequences. 10% SFS types (high frequency  
 917 mutations) were discarded. The corresponding commands for simulations are described  
 918 above.

919

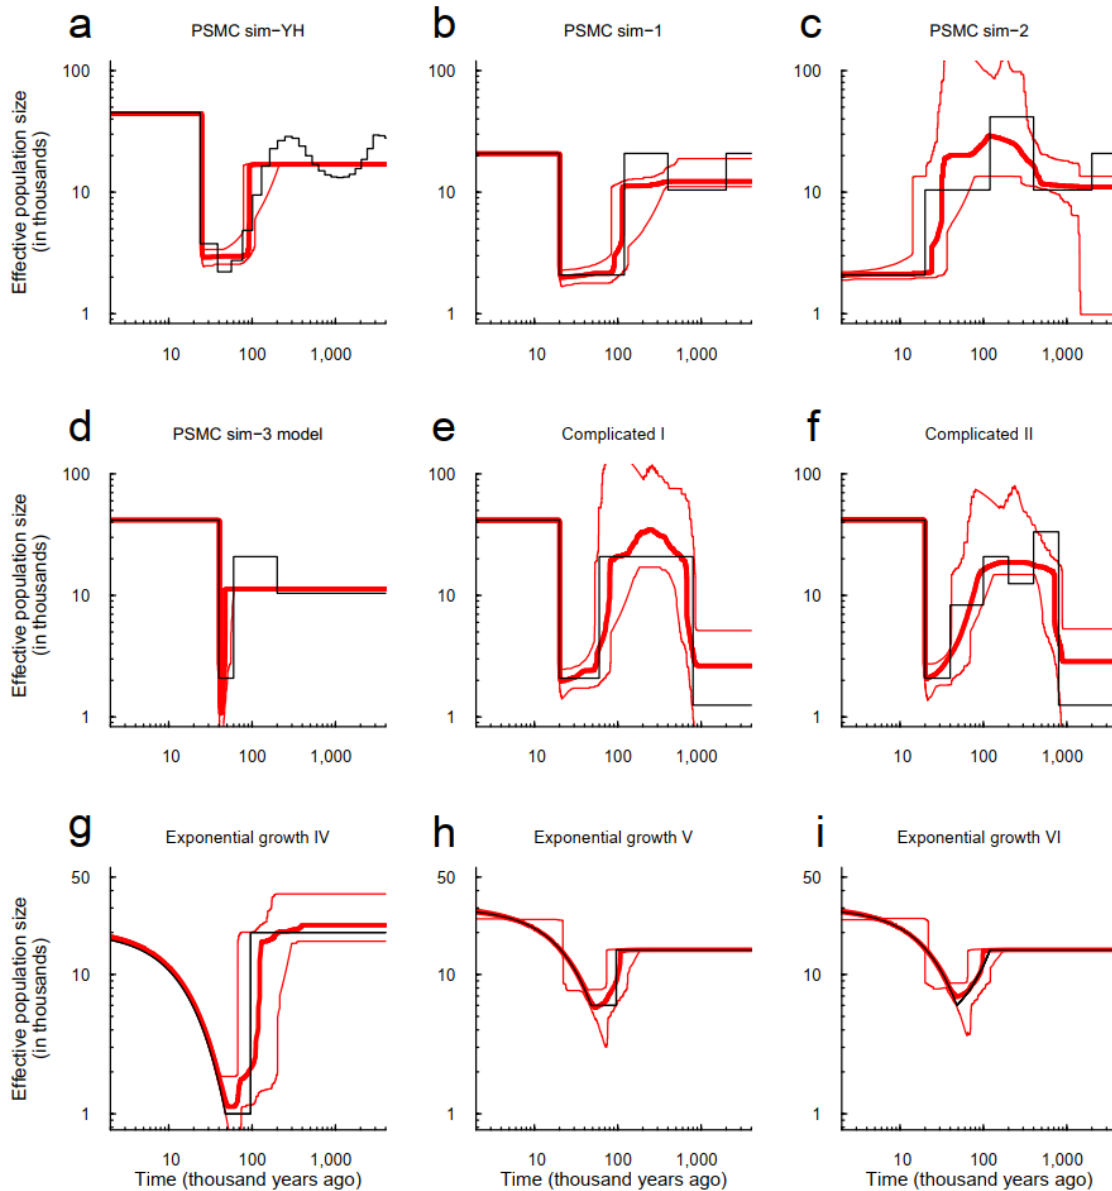

920

921 **Figure S4. Verification of FitCoal accuracy with truncated SFS under more**  
 922 **complexed models.** (a) PSMC sim-YH model. (b) PSMC sim-1 model. (c) PSMC sim-2  
 923 model. (d) PSMC sim-3 model. (e) Four stage model. (f) Intricate model. (g) Exponential  
 924 growth IV model. (h) Exponential growth V model. (i) Exponential growth VI model.

925 The nine models are the same as Figure S4. Thin solid black lines indicate true models.  
 926 Thick red lines are the medians of the estimated histories of FitCoal; thin red lines are 2.5  
 927 and 97.5 percentiles of the estimated histories of FitCoal. The number of simulated  
 928 sequences is 170 and the length of the simulated sequences is 100Mb. The corresponding  
 929 commands for simulations are described above.

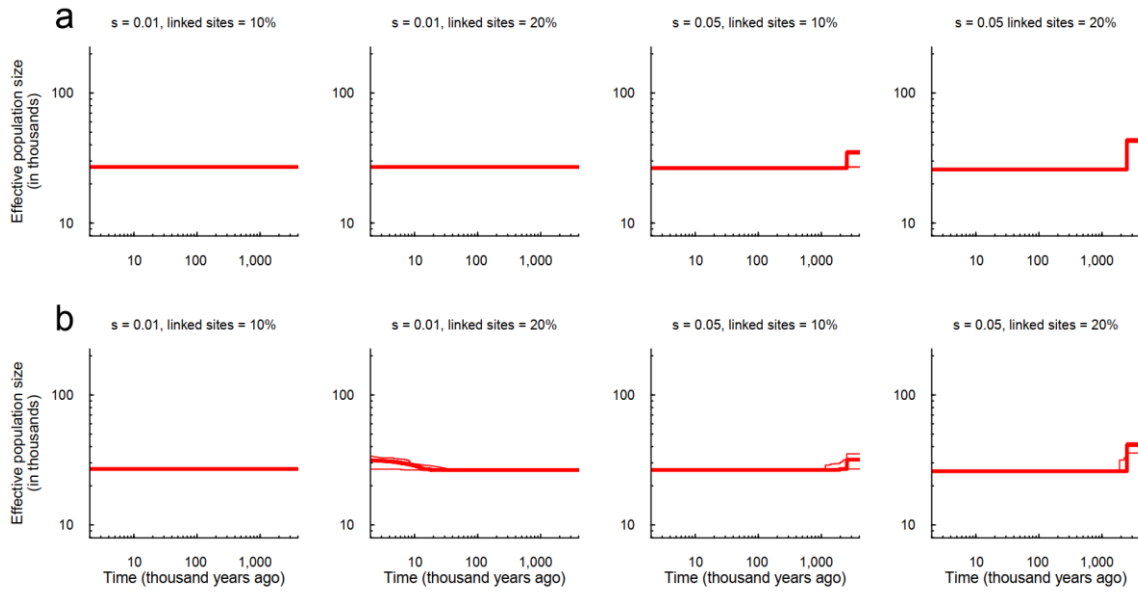

930  
 931 **Figure S5. Effects of positive selection on demographic inference.** (a) Demographic  
 932 histories inferred by using the full size SFSs. (b) Demographic histories inferred by using  
 933 the truncated SFSs. The constant size model was considered with different selection  
 934 strength ( $s$ ) and the percentage of loci affected by positive selection.  $n = 202$ . Thick red  
 935 lines are the medians of the estimated histories of FitCoal; thin red lines are 2.5 and 97.5  
 936 percentiles of the estimated histories of FitCoal.  
 937

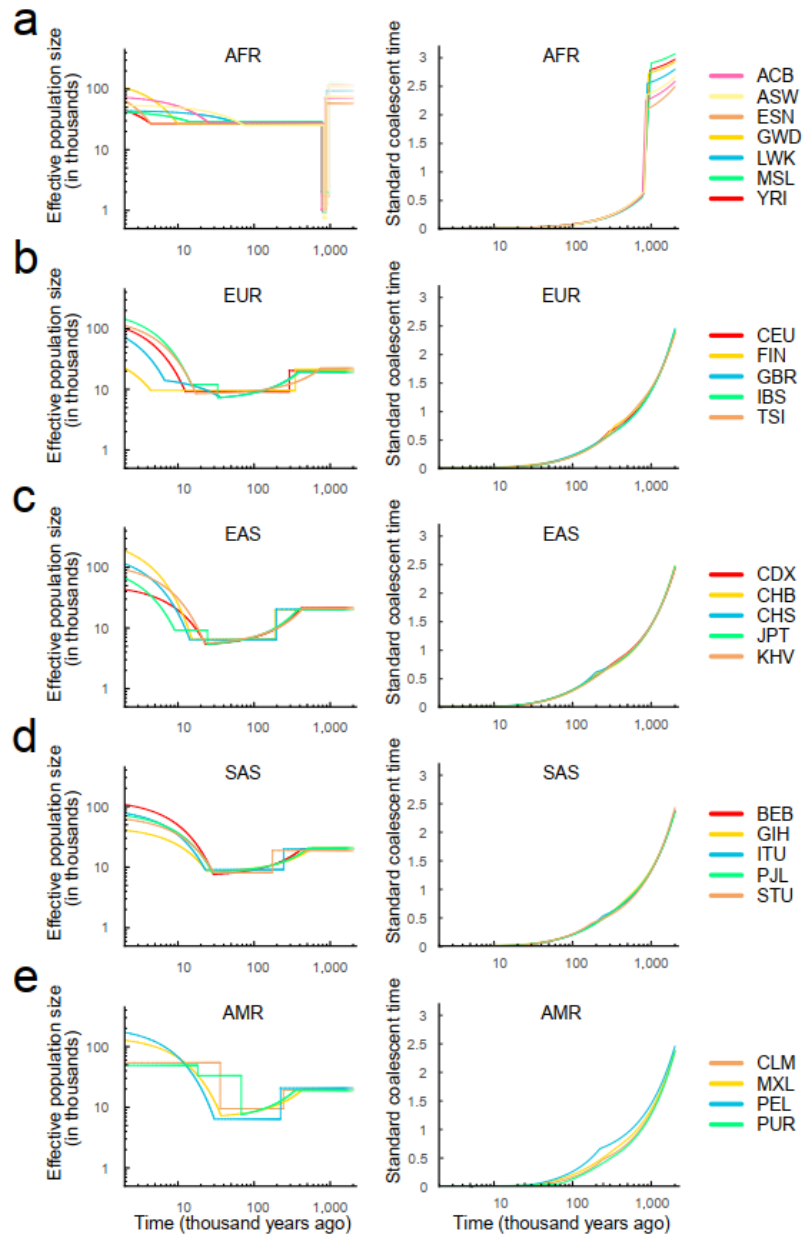

938

939 **Figure S6. Inferred demographic histories and standard coalescent times of 1000GP**

940 **populations.** (a) African populations. (b) European populations. (c) East Asian

941 populations. (d) South Asian populations. (e) American populations. The left column is

942 the inferred demographic histories, and the right column is calendar time vs standard

943 coalescent time. The results are the same with Figure 3.

944

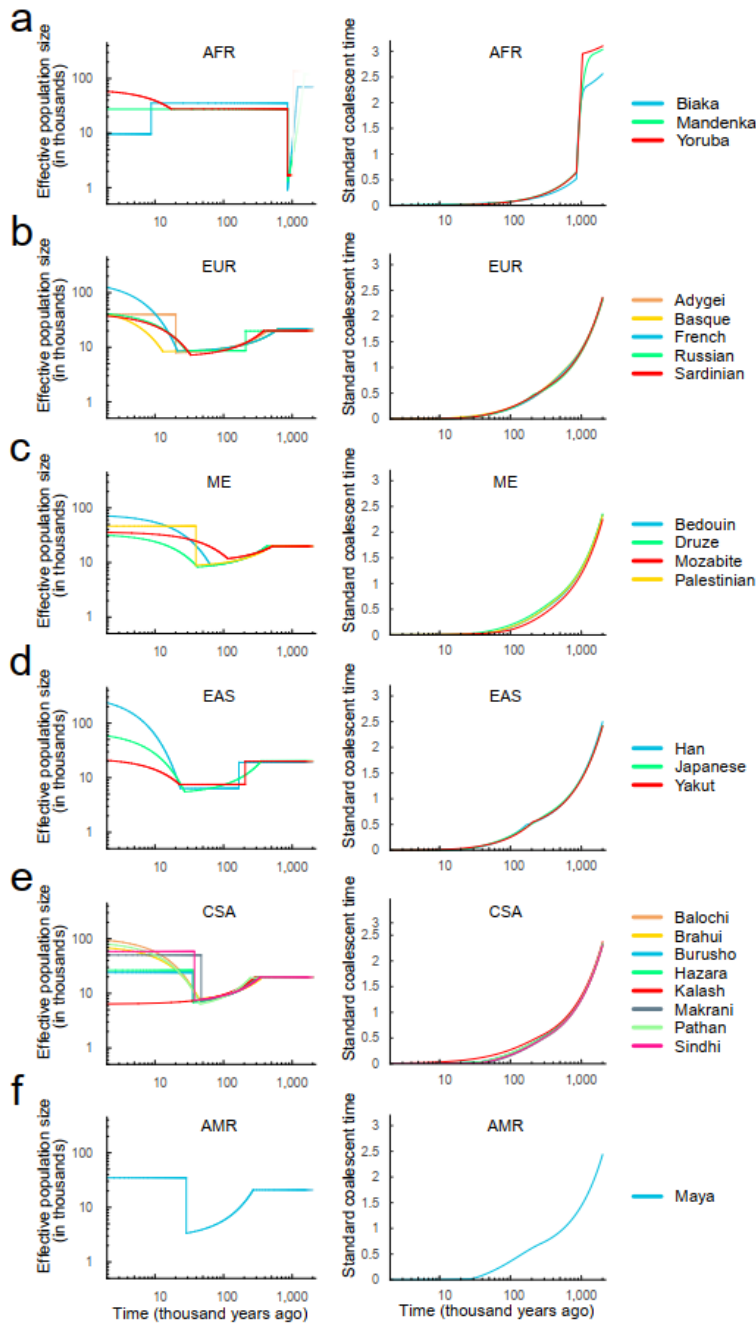

945

946 **Figure S7. Inferred demographic histories and standard coalescent times of HGPD-**  
 947 **CEPH populations.** (a) African populations. (b) European populations. (c) Middle East  
 948 populations. (d) East Asian populations. (f) Central & South Asian populations. (g)  
 949 American population. The left column is the inferred demographic histories, and the right  
 950 column is calendar time vs standard coalescent time. The results are the same with Figure  
 951 3.

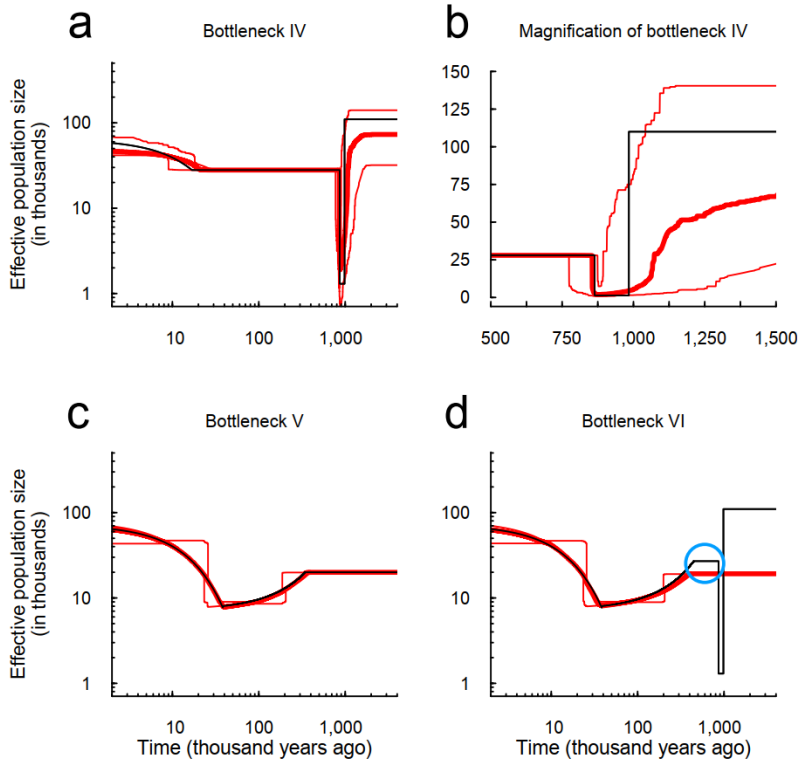

952

953 **Figure S8. Verification of the HGDP-CEPH inferred super bottleneck.** (a) Bottleneck

954 IV model and the estimated histories. The bottleneck IV mimics the estimated

955 demography of HGDP-CEPH African population. (b) Linear-scaled Bottleneck IV model

956 during the super bottleneck. (c) Bottleneck V model and the estimated histories. The

957 bottleneck V mimics the estimated demography of HGDP-CEPH non-African population.

958 (d) Bottleneck VI model and the estimated histories. The bottleneck VI mimics the true

959 demography of HGDP-CEPH non-African population. Thin black lines indicate three

960 models. Thick red lines are the medians of the estimated histories of FitCoal; thin red

961 lines are 2.5 and 97.5 percentiles of the estimated histories of FitCoal. Blue circle

962 indicates the population size gap. The number of simulated sequences is 44 in Bottleneck

963 IV, and 56 in Bottleneck V and VI, as the average sampled sequences in the HGDP-

964 CEPH African and non-African populations. The length of simulated sequences is 800

965 Mb.



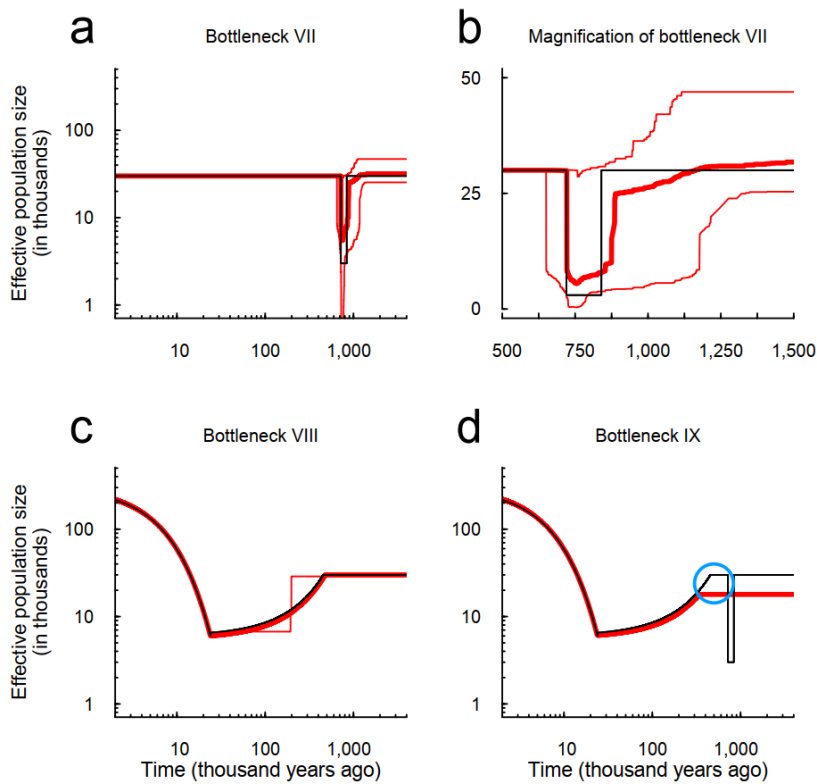

966

967 **Figure S9. Verification of the super bottleneck in artificial models.** (a) Bottleneck VII  
 968 model and the estimated histories. The artificial bottleneck VII represents the authors-  
 969 altered demography of African population. (b) Linear-scaled Bottleneck VII model  
 970 during the super bottleneck. (c) Bottleneck VIII model and the estimated histories. The  
 971 artificial bottleneck VIII represents the authors-altered estimated demography of non-  
 972 African population. (d) Bottleneck IX model and the estimated histories. The bottleneck  
 973 IX represents the authors-altered true demography of non-African population. Thin black  
 974 lines indicate models. Thick red lines are the medians of the estimated histories of  
 975 FitCoal; thin red lines are 2.5 and 97.5 percentiles of the estimated histories of FitCoal.  
 976 Blue circle indicates the population size gap. The number of simulated sequences is 170,  
 977 and the length of simulated sequences is 800 Mb.

978

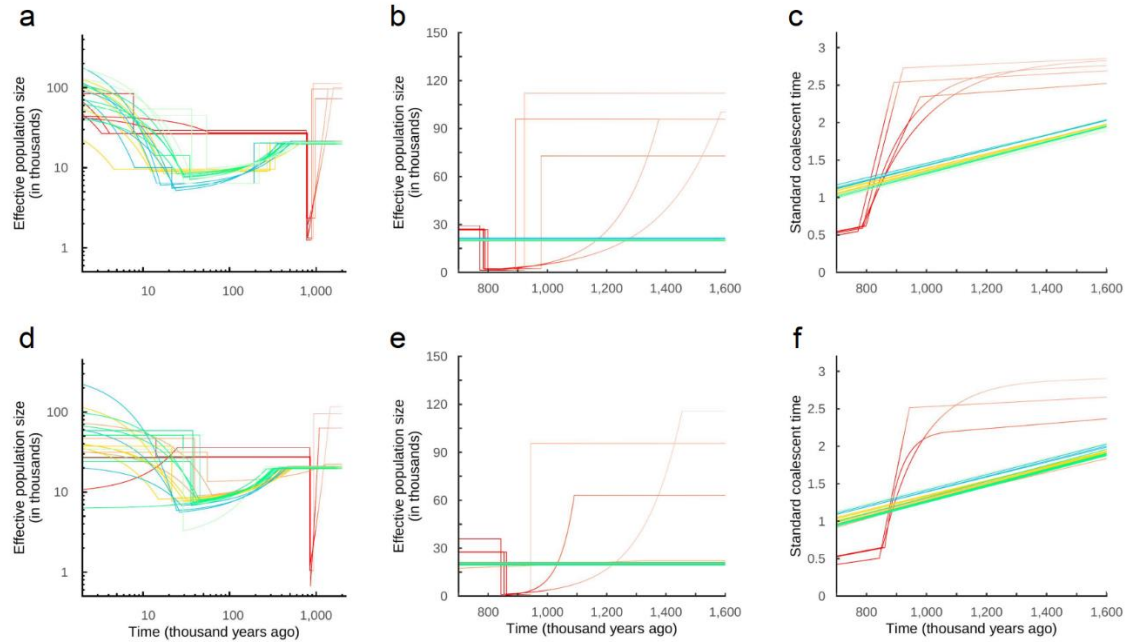

979

980 **Figure S10. Inferred demographic histories of 1000GP and HGPD-CEPH**

981 **populations using the same truncating SFS standard for each data set.** (a) Estimated

982 histories of 26 1000GP populations. (b) Linear-scaled estimated histories of 1000GP

983 populations during the super bottleneck. (c) Calendar time vs standard coalescent time

984 conditional on the estimated histories of 1000GP populations. (d) Estimated histories of

985 24 HGPD-CEPH populations. (e) Linear-scaled estimated histories of HGPD-CEPH

986 populations during the super bottleneck. (f) Calendar time vs standard coalescent time

987 conditional on the estimated histories of HGPD-CEPH populations. Red lines are the

988 estimated histories of African populations; yellow lines stand for the European

989 populations; brown lines the Middle East populations; blue lines the East Asian

990 populations; green lines the Central or South Asian populations; dark sea green lines the

991 American populations. We truncated 10% SFS types for 1000GP populations, and 15%

992 for HGPD-CEPH populations. We assumed a mutation rate of  $1.2 \times 10^{-8}$  per base per

993 generation and a generation time of 24 years, the same as Figure 2.

994

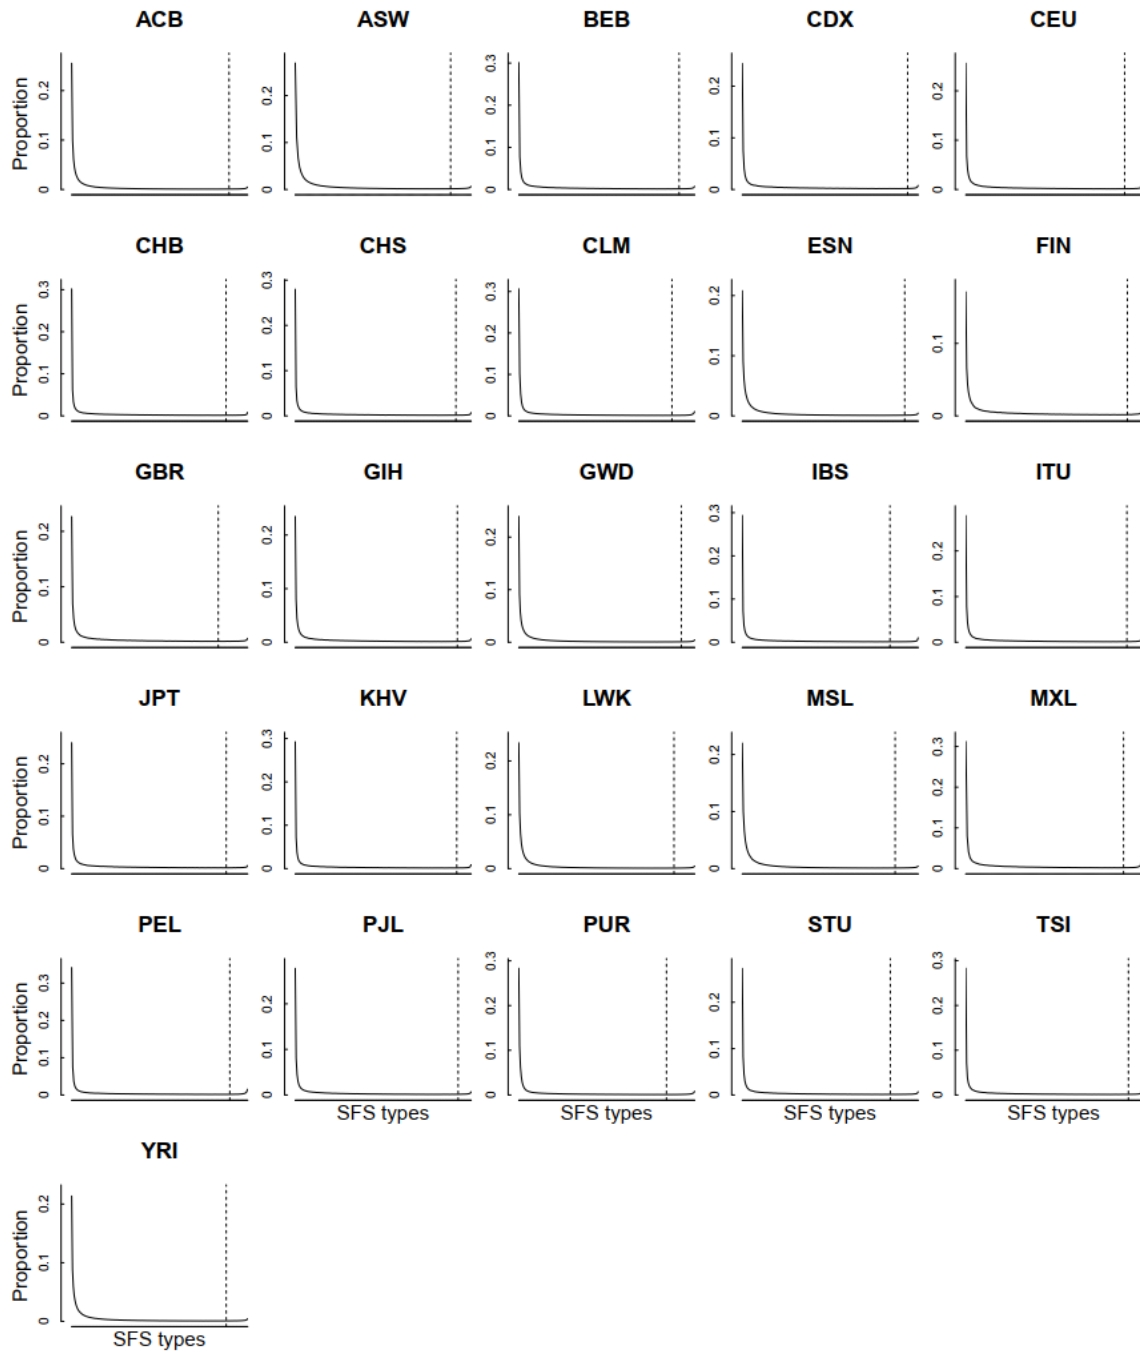

995

996

997

998

999

**Figure S11. The observed SFSs of 1000GP populations.** Solid lines indicate the observed SFS, and the  $x$ -axis is the SFS types, ranging from 1 to  $(n - 1)$ . Dash lines indicate the threshold of truncating SFS.

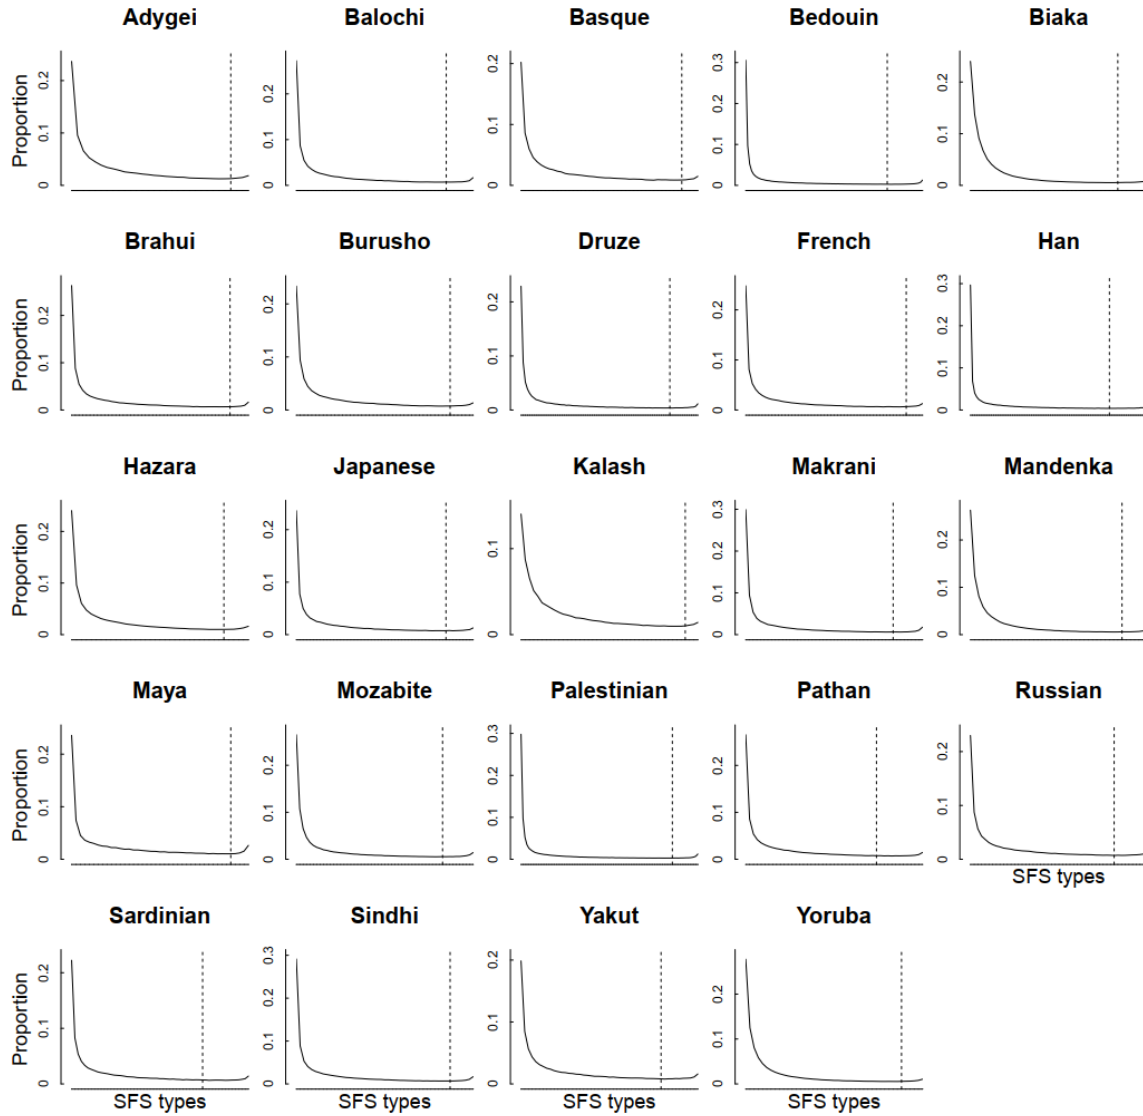

1000

1001 **Figure S12. The observed SFSs without missing data of HGDP-CEPH populations.**

1002 Solid lines indicate the observed SFS, and the  $x$ -axis is the SFS types, ranging from 1 to

1003  $(n - 1)$ . Dash lines indicate the threshold of truncating SFS.

1004

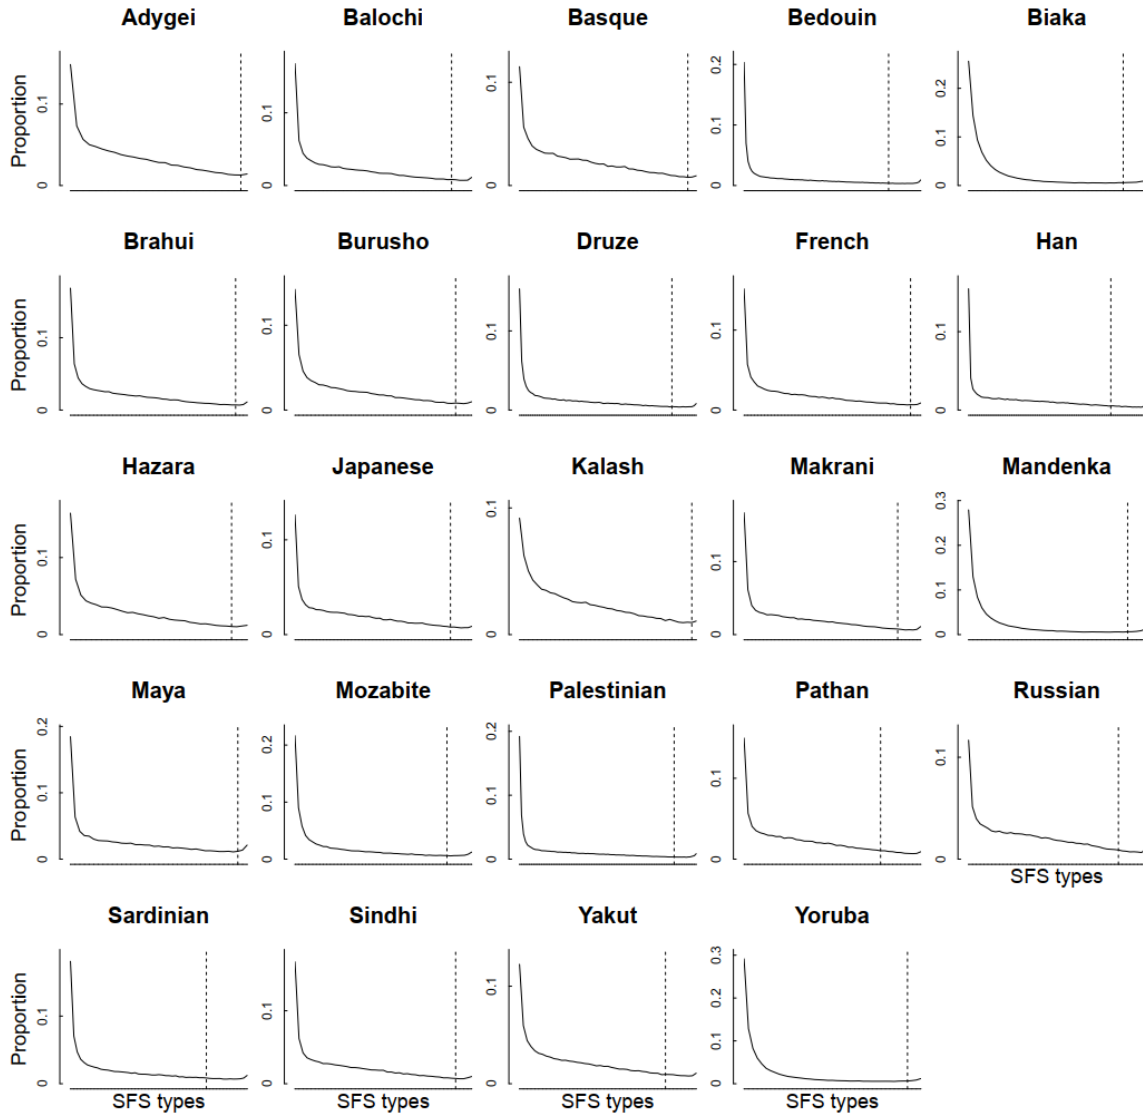

1005

1006

1007

1008

1009

1010

**Figure S13. The observed SFSs with one missing individual of HGDP-CEPH populations.** Solid lines indicate the observed SFS, and the  $x$ -axis is the SFS types, ranging from 1 to  $(n - 3)$ . Dash lines indicate the threshold of truncating SFS.

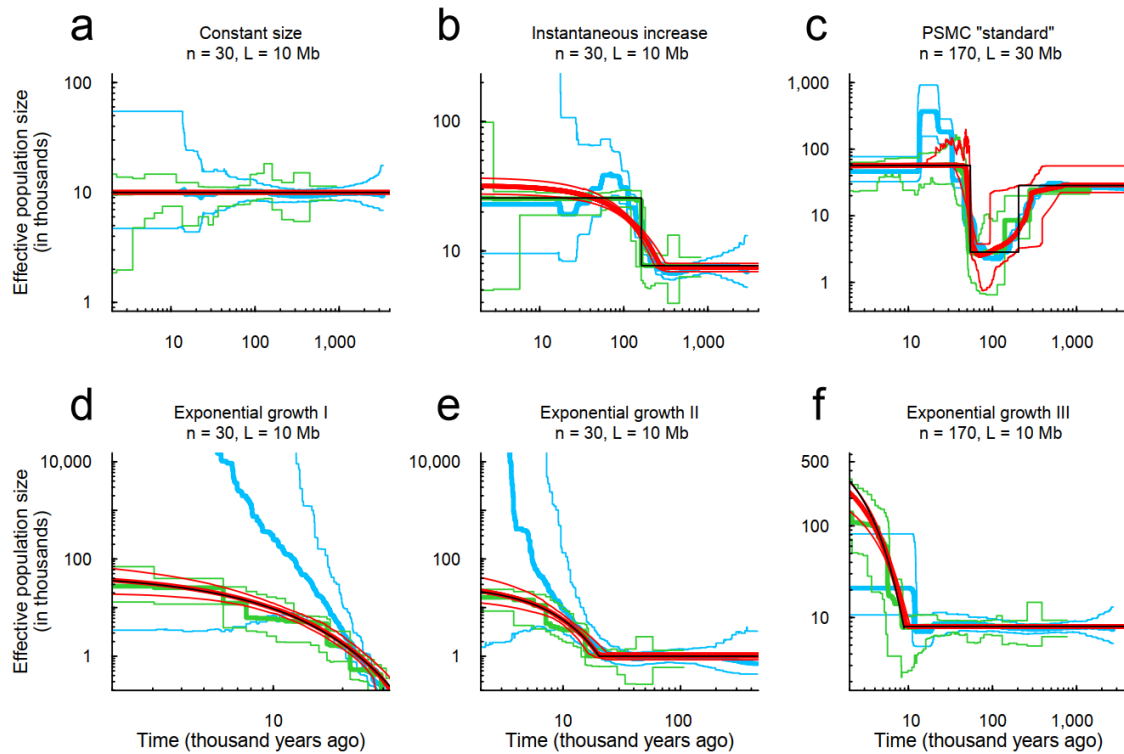

1012

1013 **Figure S14. Estimated demographic histories of FitCoal conditional on exponential**1014 **change, stairway plot, and PSMC using simulated samples. (a) Constant size model.**1015 **(b) Instantaneous increase model. (c) PSMC “standard” model. (d) Exponential growth I**1016 **model. (e) Exponential growth II model. (f) Exponential growth III model. Thin black**1017 **lines indicate true models. Thick red lines are the medians of FitCoal histories estimated**1018 **conditional on exponential change. Green and blue lines indicate the results of stairway**1019 **plot and PSMC, respectively, which are obtained from the previous study<sup>22</sup>. Other**1020 **parameters are the same with Figure 2.**

1021

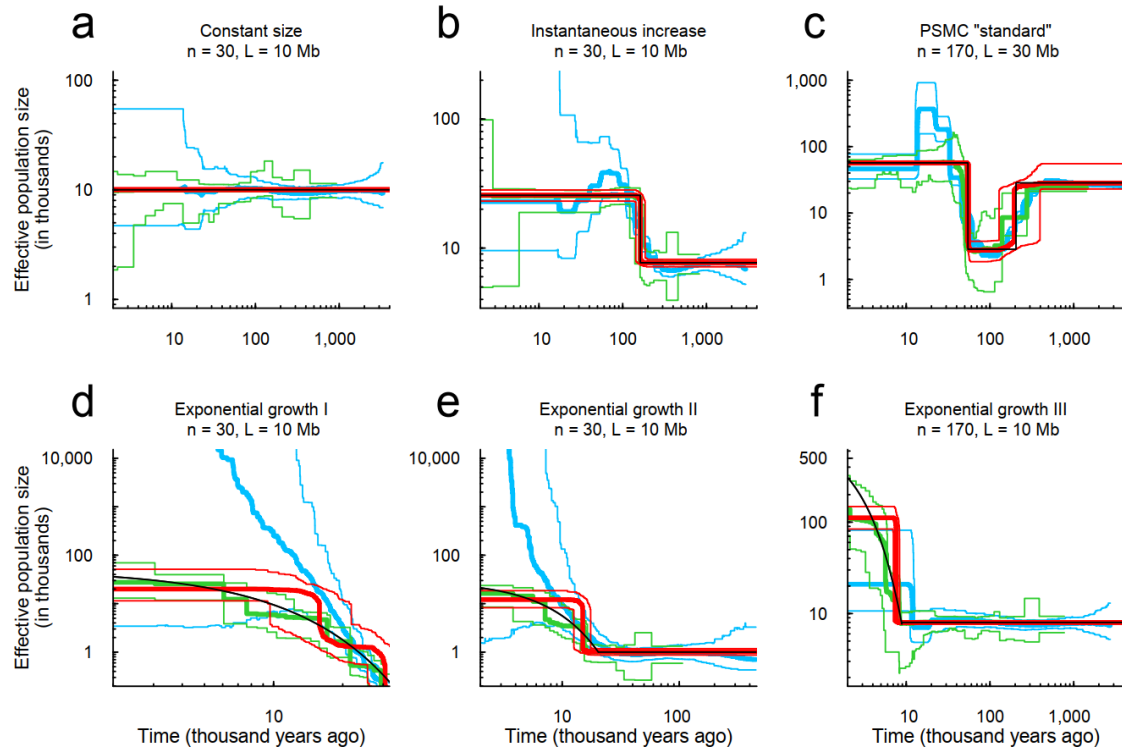

1022

1023

1024

1025

1026

1027

1028

1029

**Figure S15. Estimated demographic histories of FitCoal conditional on instantaneous change, stairway plot, and PSMC using simulated samples.** (a) Constant size model. (b) Instantaneous increase model. (c) PSMC “standard” model. (d) Exponential growth I model. (e) Exponential growth II model. (f) Exponential growth III model. FitCoal inference was performed conditional on instantaneous change. Other parameters are the same with Figure 2 and S2.

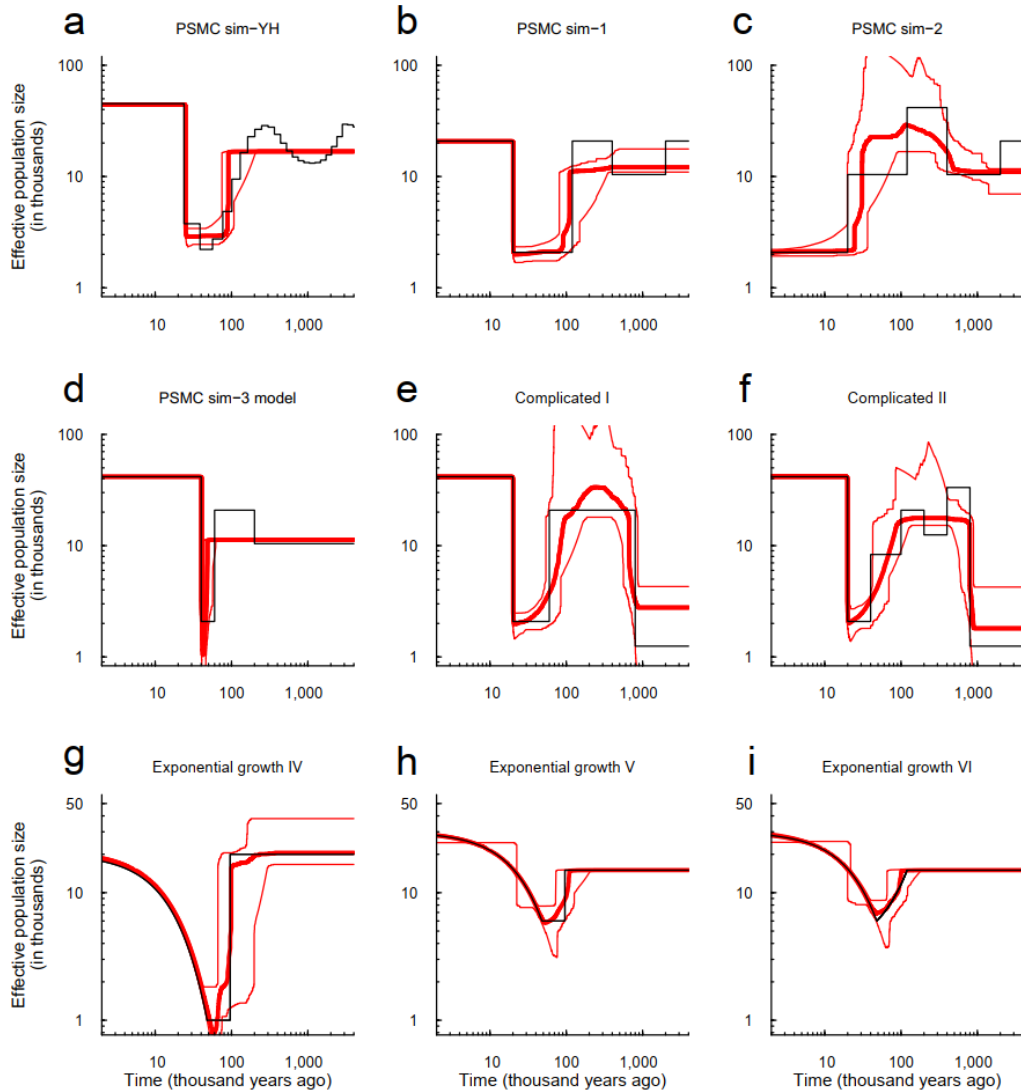

1030

1031 **Figure S16. Verification of the accuracy of FitCoal using simulated samples under**  
 1032 **complex models.** (a) PSMC sim-YH model. (b) PSMC sim-1 model. (c) PSMC sim-2  
 1033 model. (d) PSMC sim-3 model. (e) Complicated I model. (f) Complicated II model. (g)  
 1034 Exponential growth IV model. (h) Exponential growth V model. (i) Exponential growth  
 1035 VI model. Thin black lines indicate true models. Thick red lines are the medians of the  
 1036 estimated histories of FitCoal; thin red lines are 2.5 and 97.5 percentiles of the estimated  
 1037 histories of FitCoal. The number of simulated sequences is 170 and the length of the  
 1038 simulated sequences is 100Mb in all models. Other parameters are the same with Figure 2.  
 1039 The corresponding commands for simulations are described above.

1040



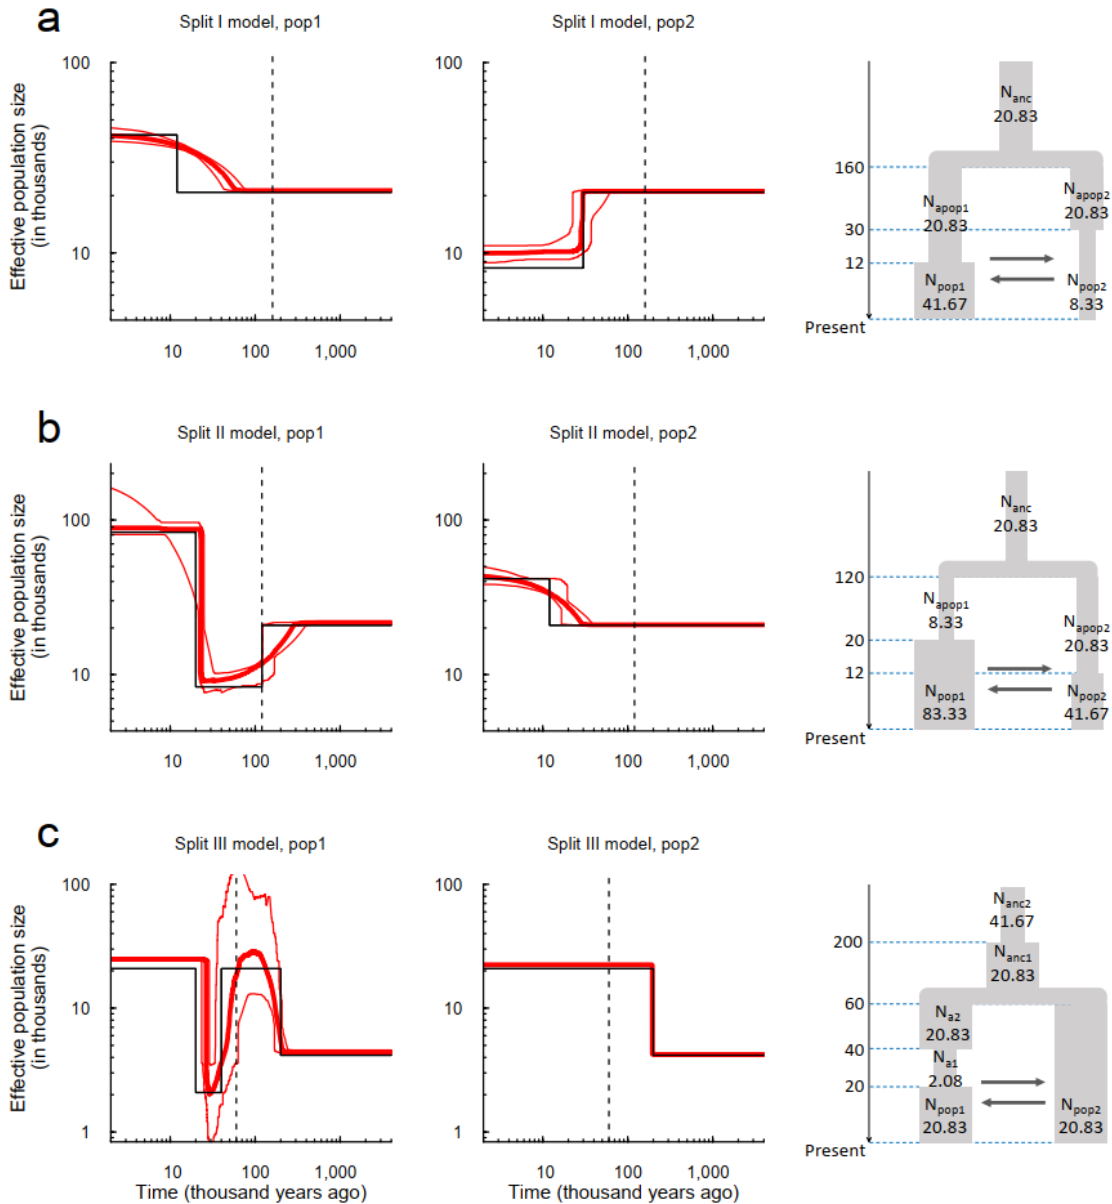

1041

1042 **Figure S17. Verification of FitCoal accuracy under three migration models. (a)**

1043 Inferred histories of two populations under Split I model. The model assumes that the two

1044 populations split at 160 kyr ago, and the first population had an instantaneous growth,

1045 and the second one had a population size decline. Migration occurred populations. The

1046 population size during each stage is shown in the model (the right panel). (b) Inferred

1047 histories of two populations under Split II model. (c) Inferred histories of two populations

1048 under Split III model. Thin solid black lines indicate true models. Thin dash lines indicate

1049 split times. Thick red lines are the medians of the estimated histories of FitCoal; thin red

1050 lines are 2.5 and 97.5 percentiles of the estimated histories of FitCoal. In three rightmost  
1051 figures, the unit of time is 1,000 years and the unit of population size is 1,000. The  
1052 number of simulated sequences is 170 and the migration rate ( $4Nm$ ) is 4. The length of  
1053 the simulated sequences is 30Mb in the first two models and 100MB in the last model.  
1054 Other parameters are the same with Figure 2. The corresponding commands for  
1055 simulations are described above.  
1056

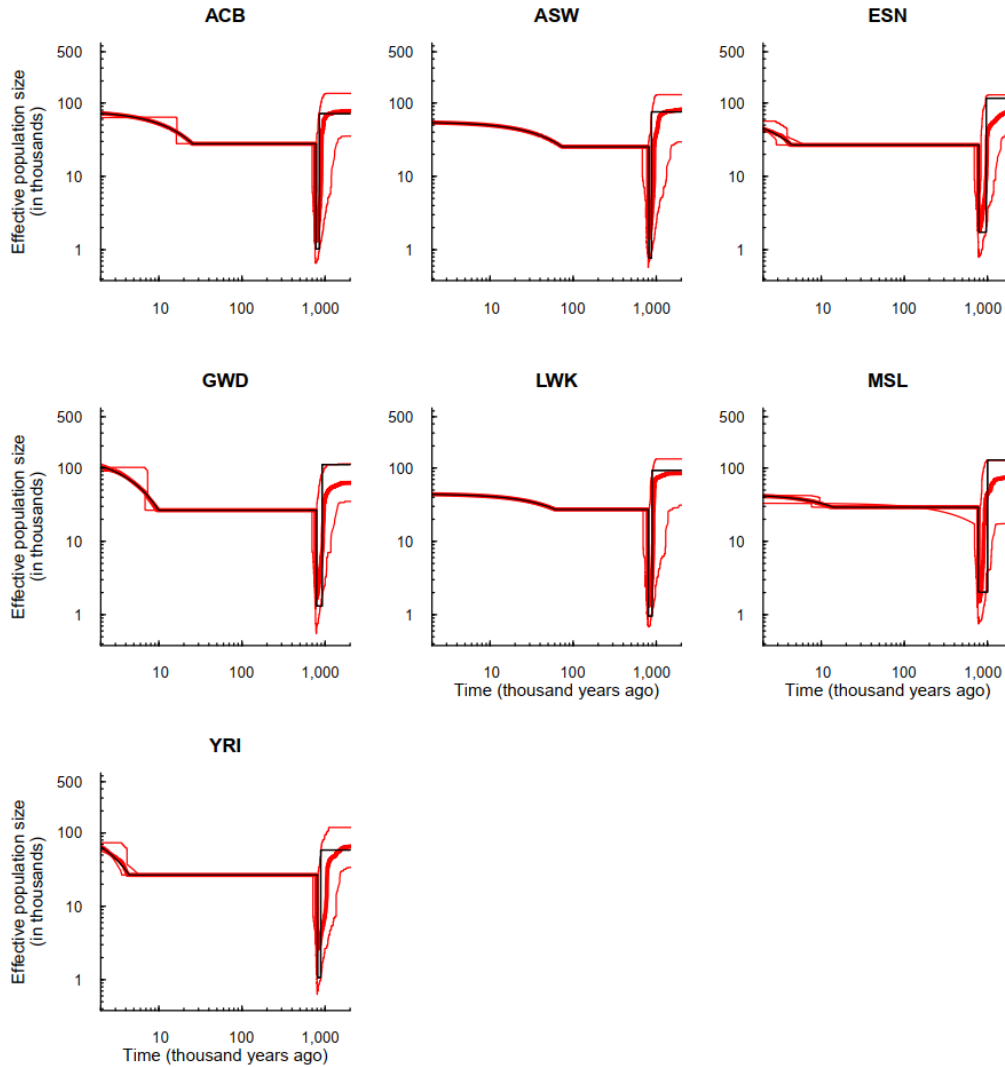

1057

1058 **Figure S18. 95% confidence intervals of 1000GP African populations.** ACB: African  
 1059 Caribbeans in Barbados; ASW: Americans of African Ancestry in SW USA; ESN: Esan  
 1060 in Nigeria; GWD: Gambian in Western Divisions in the Gambia; LWK: Luhya in  
 1061 Webuye, Kenya; MSL: Mende in Sierra Leone; YRI: Yoruba in Ibadan, Nigeria. The  
 1062 inferred demographic histories in Figure 3 are considered as true models, and 200  
 1063 simulated samples are obtained for each true model. Black lines indicate true models.  
 1064 Thick red lines are the medians of the estimated histories of FitCoal; thin red lines are 2.5  
 1065 and 97.5 percentiles of the estimated histories of FitCoal. Truncated SFSs were used. The  
 1066 corresponding commands for simulations are described above.

1067

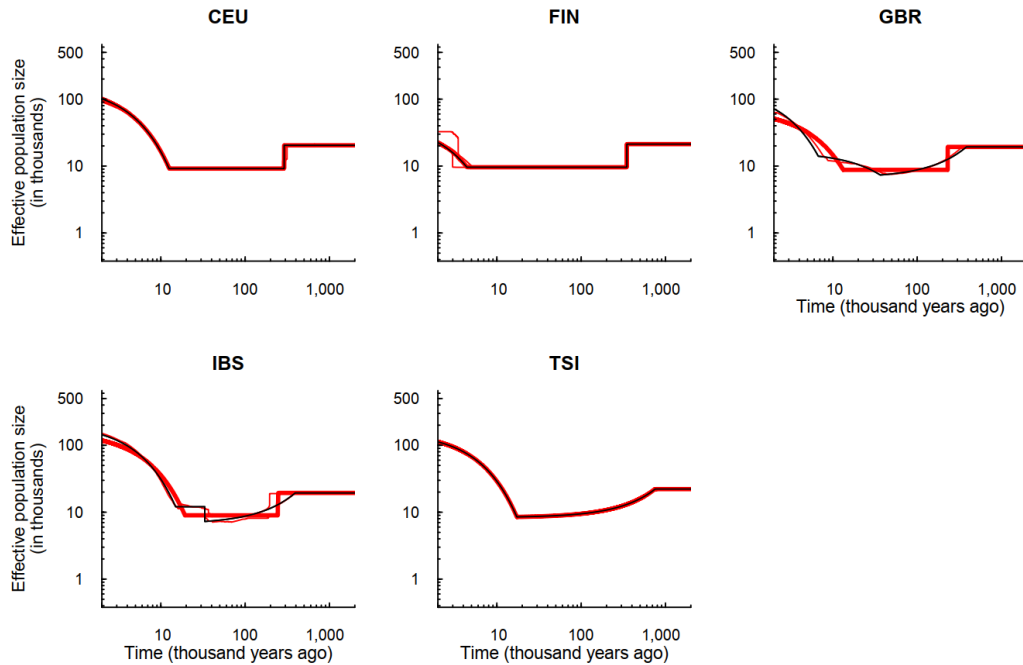

1068

1069 **Figure S19. 95% confidence intervals of 1000GP European populations.** CEU: Utah  
 1070 Residents (CEPH) with Northern and Western European Ancestry; FIN: Finnish in  
 1071 Finland; GBR: British in England and Scotland; IBS: Iberian Population in Spain; TSI:  
 1072 Toscani in Italia. The inferred demographic histories in Figure 3 are considered as true  
 1073 models, and 200 simulated samples are obtained for each true model. Black lines indicate  
 1074 true models. Thick red lines are the medians of the estimated histories of FitCoal; thin red  
 1075 lines are 2.5 and 97.5 percentiles of the estimated histories of FitCoal. Truncated SFSS  
 1076 were used. The corresponding commands for simulations are described above.

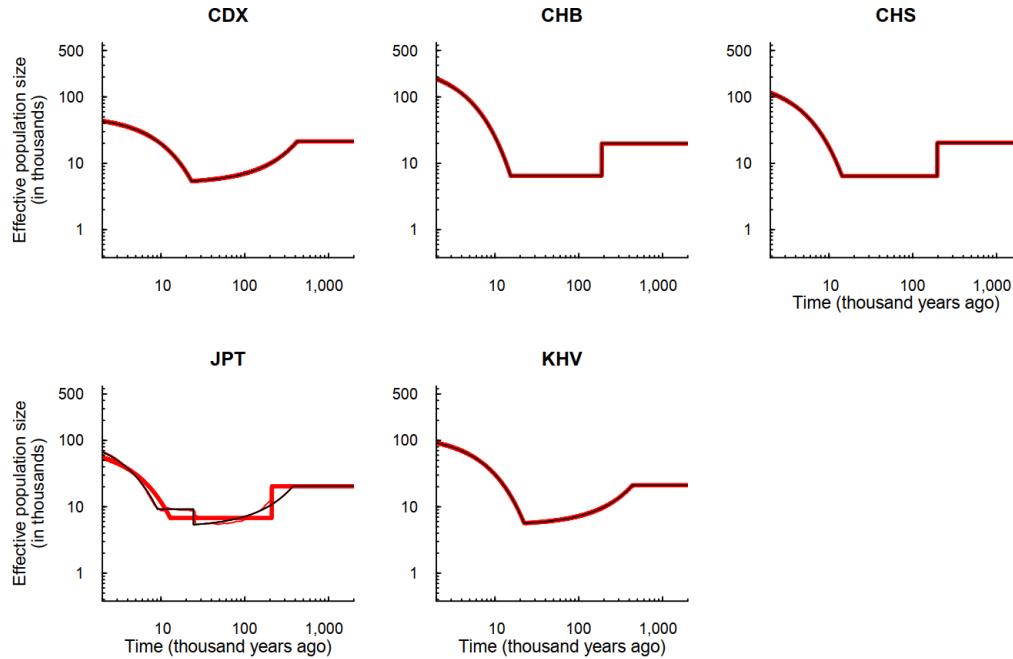

1077

1078 **Figure S20. 95% confidence intervals of 1000GP East Asian populations.** CDX:  
 1079 Chinese Dai in Xishuangbanna, China; CHB: Han Chinese in Beijing, China; CHS:  
 1080 Southern Han Chinese; JPT: Japanese in Tokyo, Japan; KHV: Kinh in Ho Chi Minh City,  
 1081 Vietnam. The inferred demographic histories in Figure 3 are considered as true models,  
 1082 and 200 simulated samples are obtained for each true model. Black lines indicate true  
 1083 models. Thick red lines are the medians of the estimated histories of FitCoal; thin red  
 1084 lines are 2.5 and 97.5 percentiles of the estimated histories of FitCoal. Truncated SFSs  
 1085 were used. The corresponding commands for simulations are described above.  
 1086

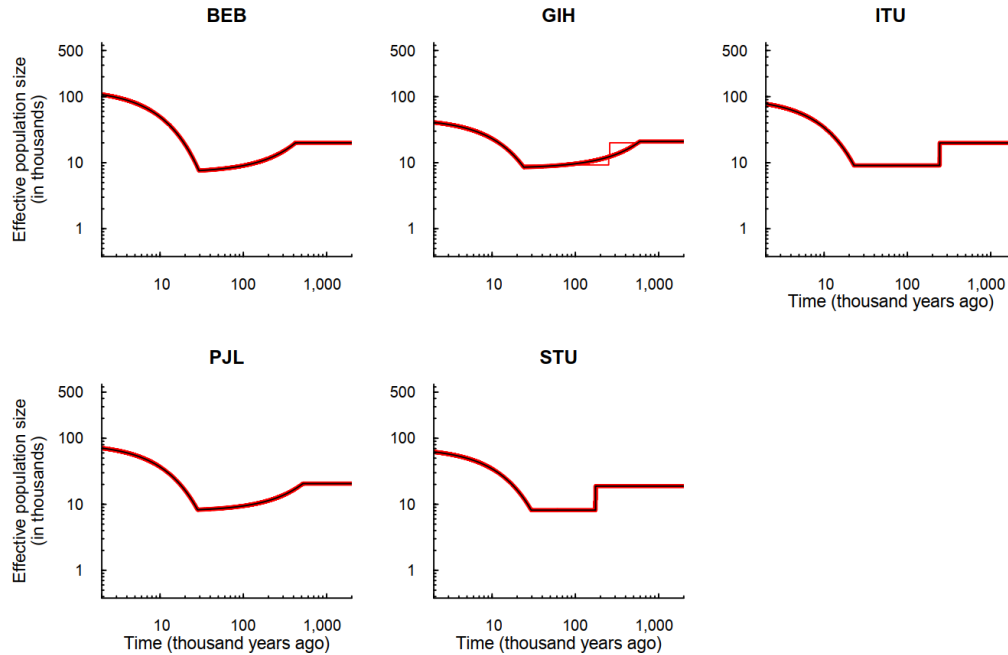

1087

1088 **Figure S21. 95% confidence intervals of 1000GP South Asian populations. BEB:**  
 1089 Bengali from Bangladesh; GIH: Gujarati Indian from Houston, Texas; ITU: Indian  
 1090 Telugu from the UK; PJJ: Punjabi from Lahore, Pakistan; STU: Sri Lankan Tamil from  
 1091 the UK. The inferred demographic histories in Figure 3 are considered as true models,  
 1092 and 200 simulated samples are obtained for each true model. Black lines indicate true  
 1093 models. Thick red lines are the medians of the estimated histories of FitCoal; thin red  
 1094 lines are 2.5 and 97.5 percentiles of the estimated histories of FitCoal. Truncated SFSs  
 1095 were used. The corresponding commands for simulations are described above.  
 1096

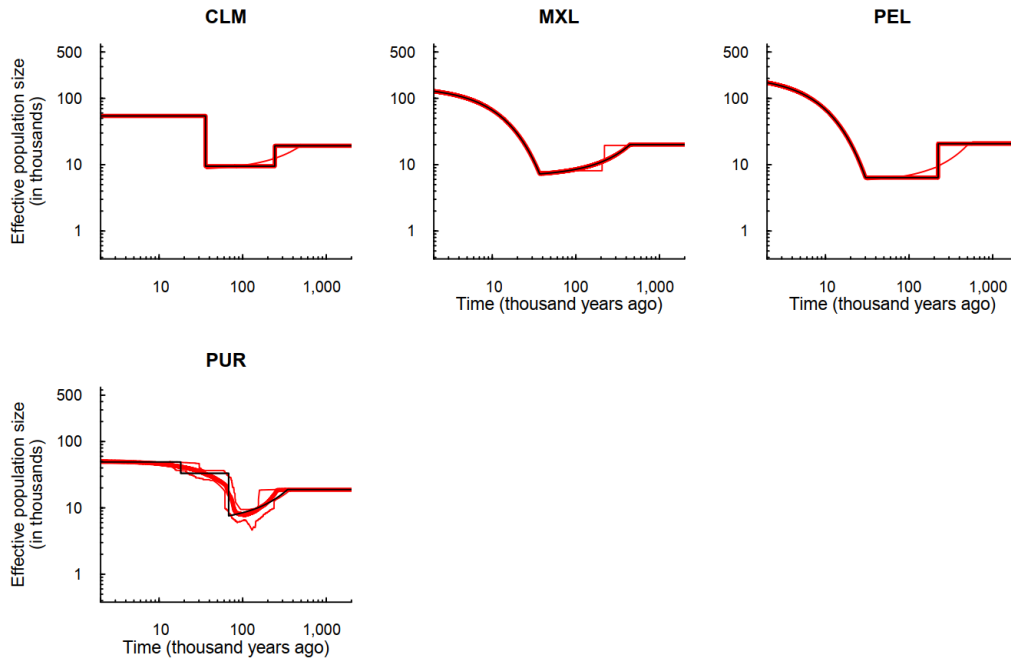

1097

1098 **Figure S22. 95% confidence intervals of 1000GP American populations. CLM:**  
 1099 Colombians from Medellin, Colombia; MXL: Mexican Ancestry from Los Angeles USA;  
 1100 PEL: Peruvians from Lima, Peru; PUR: Puerto Ricans from Puerto Rico. The inferred  
 1101 demographic histories in Figure 3 are considered as true models, and 200 simulated  
 1102 samples are obtained for each true model. Black lines indicate true models. Thick red  
 1103 lines are the medians of the estimated histories of FitCoal; thin red lines are 2.5 and 97.5  
 1104 percentiles of the estimated histories of FitCoal. Truncated SFSs were used. The  
 1105 corresponding commands for simulations are described above.

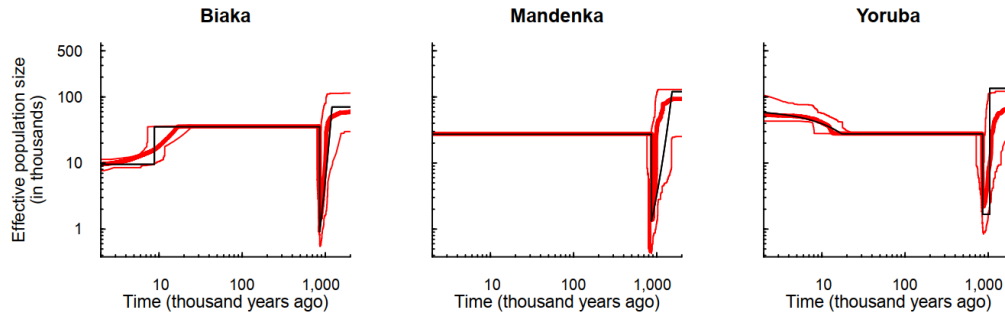

1106

1107 **Figure S23. 95% confidence intervals of HGPD-CEPH African populations.** The  
 1108 inferred demographic histories in Figure 3 are considered as true models, and 200  
 1109 simulated samples are obtained for each true model. Black lines indicate true models.  
 1110 Thick red lines are the medians of the estimated histories of FitCoal; thin red lines are 2.5  
 1111 and 97.5 percentiles of the estimated histories of FitCoal. Truncated SFSs were used. The  
 1112 corresponding commands for simulations are described above.



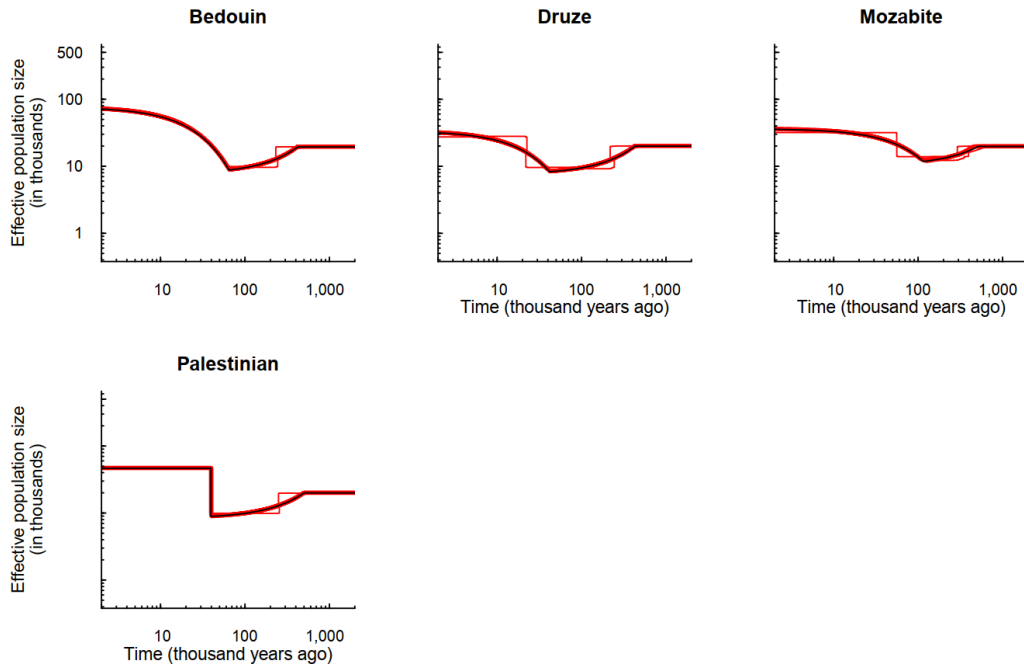

1113

1114 **Figure S24. 95% confidence intervals of HGPD-CEPH Middle East populations.** The

1115 inferred demographic histories in Figure 3 are considered as true models, and 200

1116 simulated samples are obtained for each true model. Black lines indicate true models.

1117 Thick red lines are the medians of the estimated histories of FitCoal; thin red lines are 2.5

1118 and 97.5 percentiles of the estimated histories of FitCoal. Truncated SFSs were used. The

1119 corresponding commands for simulations are described above.

1120

1121

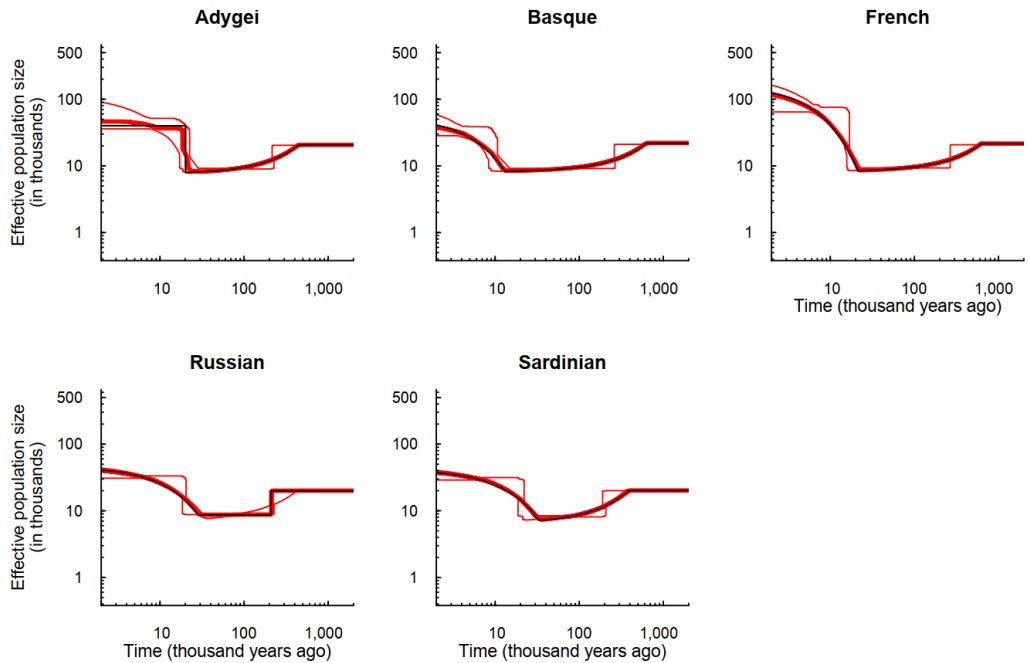

1122

1123 **Figure S25. 95% confidence intervals of HGPD-CEPH European populations.** The  
 1124 inferred demographic histories in Figure 3 are considered as true models, and 200  
 1125 simulated samples are obtained for each true model. Black lines indicate true models.  
 1126 Thick red lines are the medians of the estimated histories of FitCoal; thin red lines are 2.5  
 1127 and 97.5 percentiles of the estimated histories of FitCoal. Truncated SFSs were used. The  
 1128 corresponding commands for simulations are described above.

1129

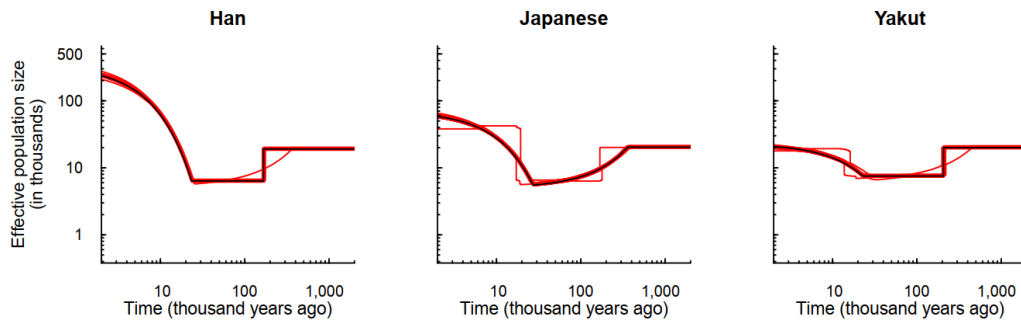

1130

1131 **Figure S26. 95% confidence intervals of HGPD-CEPH East Asian populations.** The  
 1132 inferred demographic histories in Figure 3 are considered as true models, and 200  
 1133 simulated samples are obtained for each true model. Black lines indicate true models.  
 1134 Thick red lines are the medians of the estimated histories of FitCoal; thin red lines are 2.5  
 1135 and 97.5 percentiles of the estimated histories of FitCoal. Truncated SFSs were used. The  
 1136 corresponding commands for simulations are described above.  
 1137

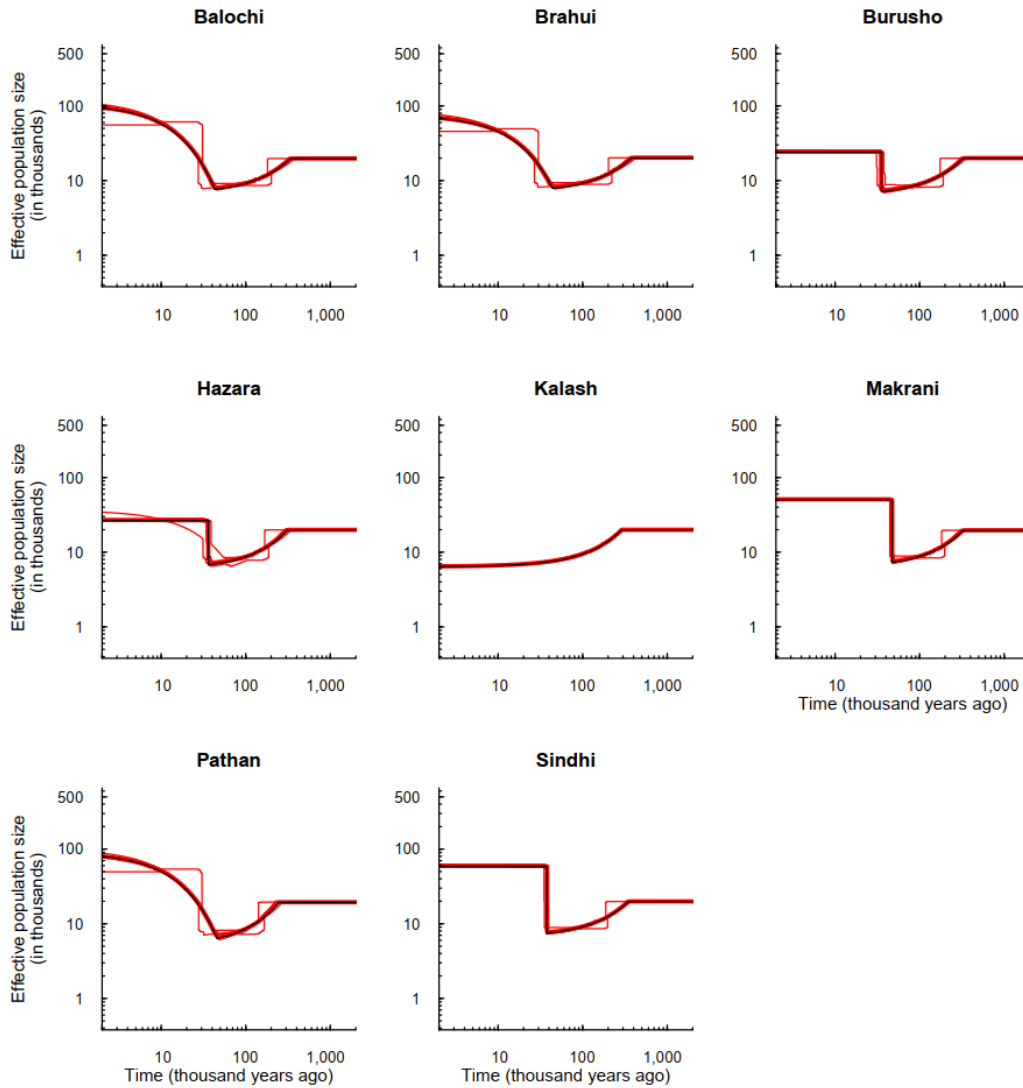

1138

1139 **Figure S27. 95% confidence intervals of HGPD-CEPH Central & South Asian**

1140 **populations.** The inferred demographic histories in Figure 3 are considered as true

1141 models, and 200 simulated samples are obtained for each true model. Black lines indicate

1142 true models. Thick red lines are the medians of the estimated histories of FitCoal; thin red

1143 lines are 2.5 and 97.5 percentiles of the estimated histories of FitCoal. Truncated SFSs

1144 were used. The corresponding commands for simulations are described above.

1145

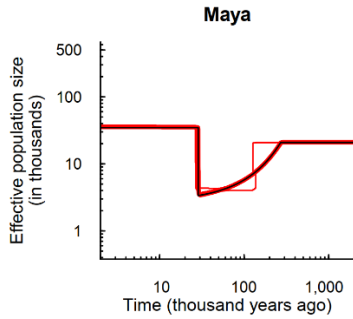

1146

1147 **Figure S28. 95% confidence intervals of HGPD-CEPH American population.** The  
 1148 inferred demographic history in Figure 3 is considered as the true model, and 200  
 1149 simulated samples are obtained for the true model. Black line indicates the true model.  
 1150 Thick red line is the median of the estimated histories of FitCoal; thin red lines are 2.5  
 1151 and 97.5 percentiles of the estimated histories of FitCoal. Truncated SFSs were used. The  
 1152 corresponding command for simulations is described above.

1153

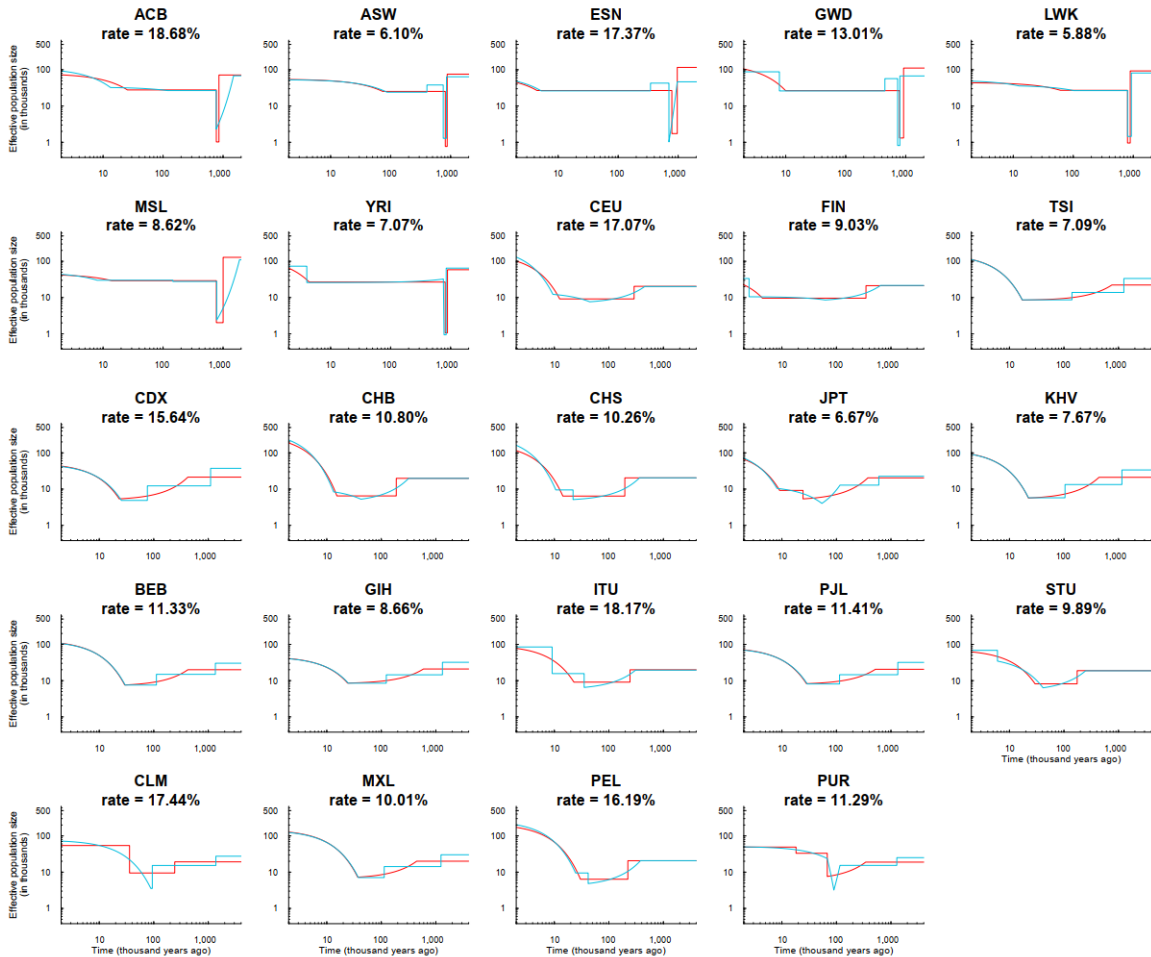

1154

1155 **Figure S29. Inferred demographic histories with different inference time intervals of**  
 1156 **1000GP populations.** Red lines indicate the inferred demographic histories, and blue  
 1157 lines indicate demographic histories with one more inference time interval. The log-  
 1158 likelihood promotion rate for the blue-line-indicating history is presented below the name  
 1159 of population. The results of populations are shown in which log-likelihood promotion  
 1160 rate is at least 5% (Table S16).

1161

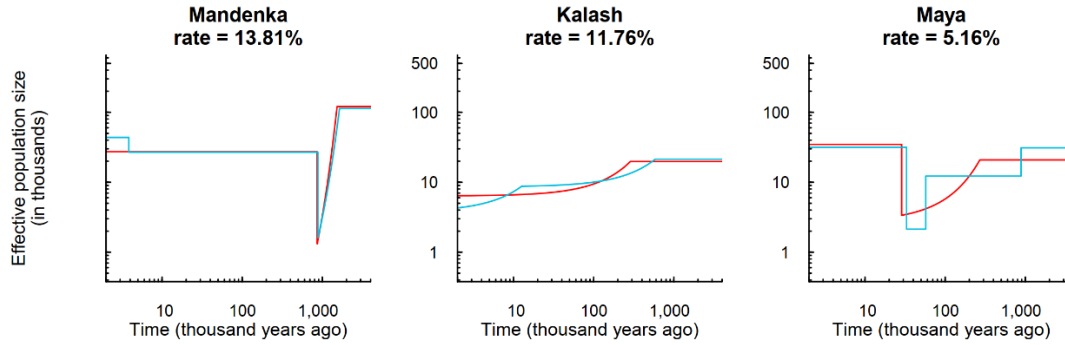

1162

1163 **Figure S30. Inferred demographic histories with different inference time intervals of**

1164 **HGPD-CEPH American populations.** Red lines indicate the inferred demographic

1165 histories, and blue lines indicate demographic histories with one more inference time

1166 interval. The log-likelihood promotion rate for the blue-line-indicating history is

1167 presented below the name of population. The results of populations are shown in which

1168 log-likelihood promotion rate is at least 5% (Table S17).

1169

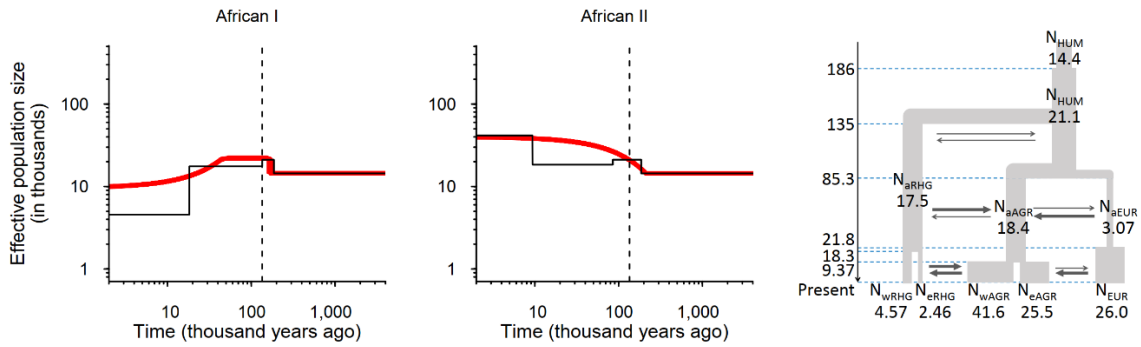

1170

1171 **Figure S31. Verification of inference accuracy under complex population structure**

1172 **model.** We used FitCoal to estimate the demography of imaginary wRHG (African I

1173 population) and wAGR (African II population). Split times and population sizes are show

1174 in the right panel. The unit of time is 1,000 years and the unit of population size is 1,000.

1175 In the left and middle panel, thin solid black lines indicate true models. Thick red lines

1176 are the medians of the estimated histories of FitCoal; thin red lines are 2.5 and 97.5

1177 percentiles of the estimated histories of FitCoal. Truncated SFSs of simulated samples

1178 were used to infer the history. The corresponding command for simulations is described

1179 above. The number of simulated sequences is 170, and the length of simulated sequences

1180 is 800 Mb.

1181



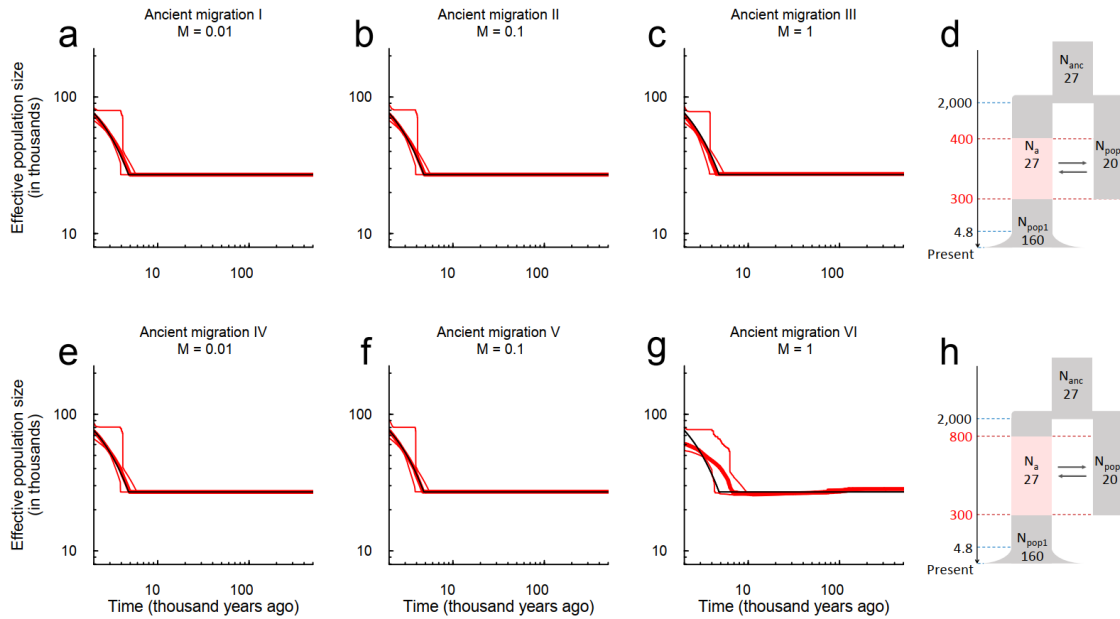

1182

1183 **Figure S32. Verification of inference accuracy when migration occurred with**  
 1184 **unknown hominin population.** Two models were considered with different time range  
 1185 of migration between the pop1 and an unknown hominin population (d, h), in which the  
 1186 unit of time is 1,000 years and the unit of population size is 1,000. The region with light  
 1187 red indicates the time range of migration in pop1. We assumed that the unknown  
 1188 population and modern human had common ancestors 2,000 kya. In (d), the unknown  
 1189 population began to migrate with modern human 400 kya, and stopped 300 kya. In (h),  
 1190 the unknown population began to migrate with modern human 800 kya, and stopped 300  
 1191 kya.  $M$  is the migration rate ( $4Nm$ ). The inferred demographic histories of pop1 in (d) are  
 1192 shown in (a – c), and (e – g) are results of pop1 in the second model (h). The number of  
 1193 simulated sequences is 170, and the length of simulated sequences is 800 Mb. Truncated  
 1194 SFSs were used. Thin solid black lines indicate true models. Thick red lines are the  
 1195 medians of the estimated histories of FitCoal; thin red lines are 2.5 and 97.5 percentiles of  
 1196 the estimated histories of FitCoal.

1197

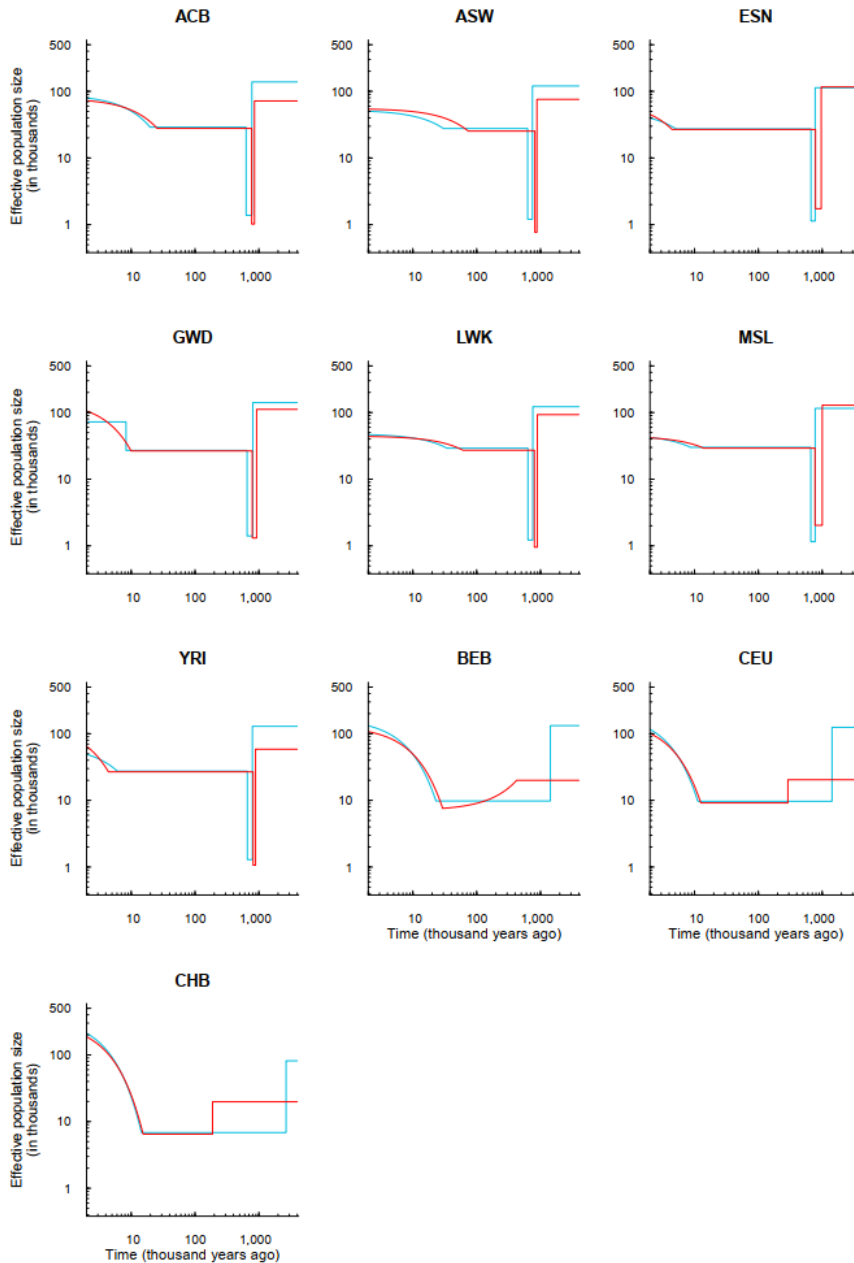

1198

1199 **Figure S33. Estimated demographic histories using the full and the truncated SFSs**  
 1200 **of 1000GP populations.** ACB: African Caribbeans in Barbados; ASW: Americans of  
 1201 African Ancestry in SW USA; ESN: Esan in Nigeria; GWD: Gambian in Western  
 1202 Divisions in the Gambia; LWK: Luhya in Webuye, Kenya; MSL: Mende in Sierra Leone;  
 1203 YRI: Yoruba in Ibadan, Nigeria, BEB: Bengali from Bangladesh; CEU: Utah Residents  
 1204 (CEPH) with Northern and Western European Ancestry; CHB: Han Chinese in Beijing,  
 1205 China. The comparison is conducted conditional on the same number of inference time  
 1206 intervals. Red lines indicate the demographic histories inferred using the truncated SFSs,

1207 the same as what were shown in Figure 3a and S9, and blue lines indicate these inferred  
1208 using the full SFS.

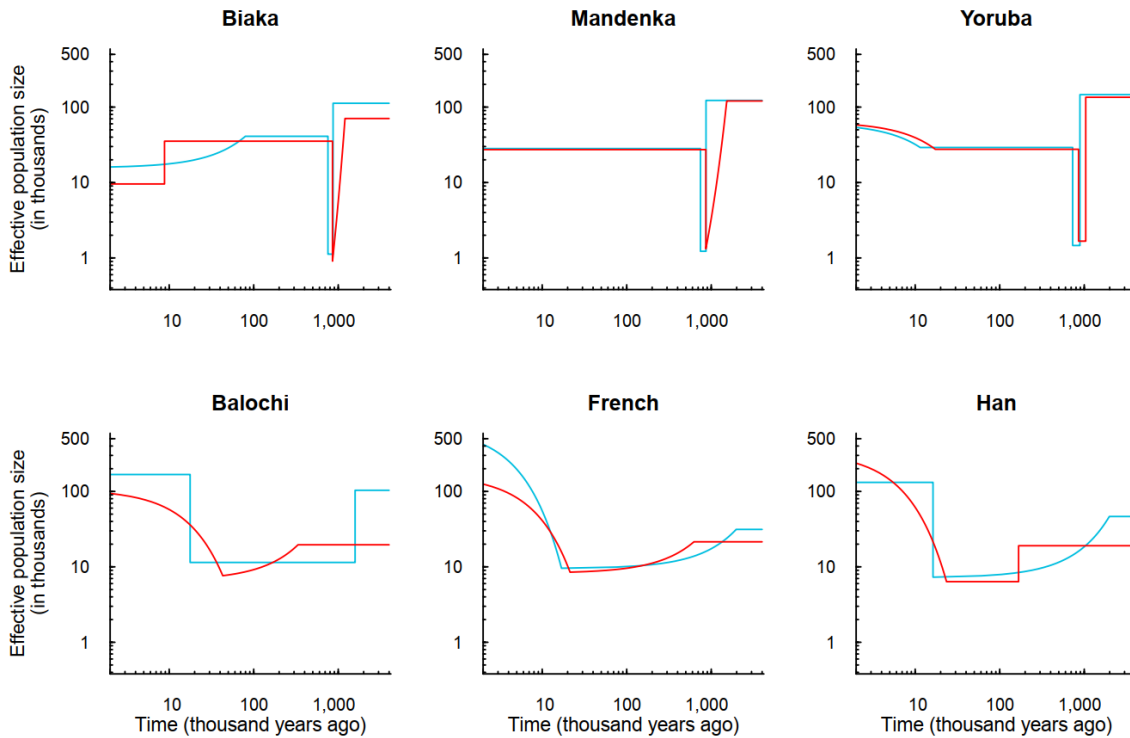

1209

1210 **Figure S34. Estimated demographic histories using the full and the truncated SFSs**

1211 **of HGDP-CEPH populations.** The comparison is conducted conditional on the same

1212 number of inference time intervals. Red lines indicate the demographic histories inferred

1213 using the truncated SFSs, the same as what were shown in Figure 3d and S10, and blue

1214 lines indicate these inferred using the full SFSs.

1215

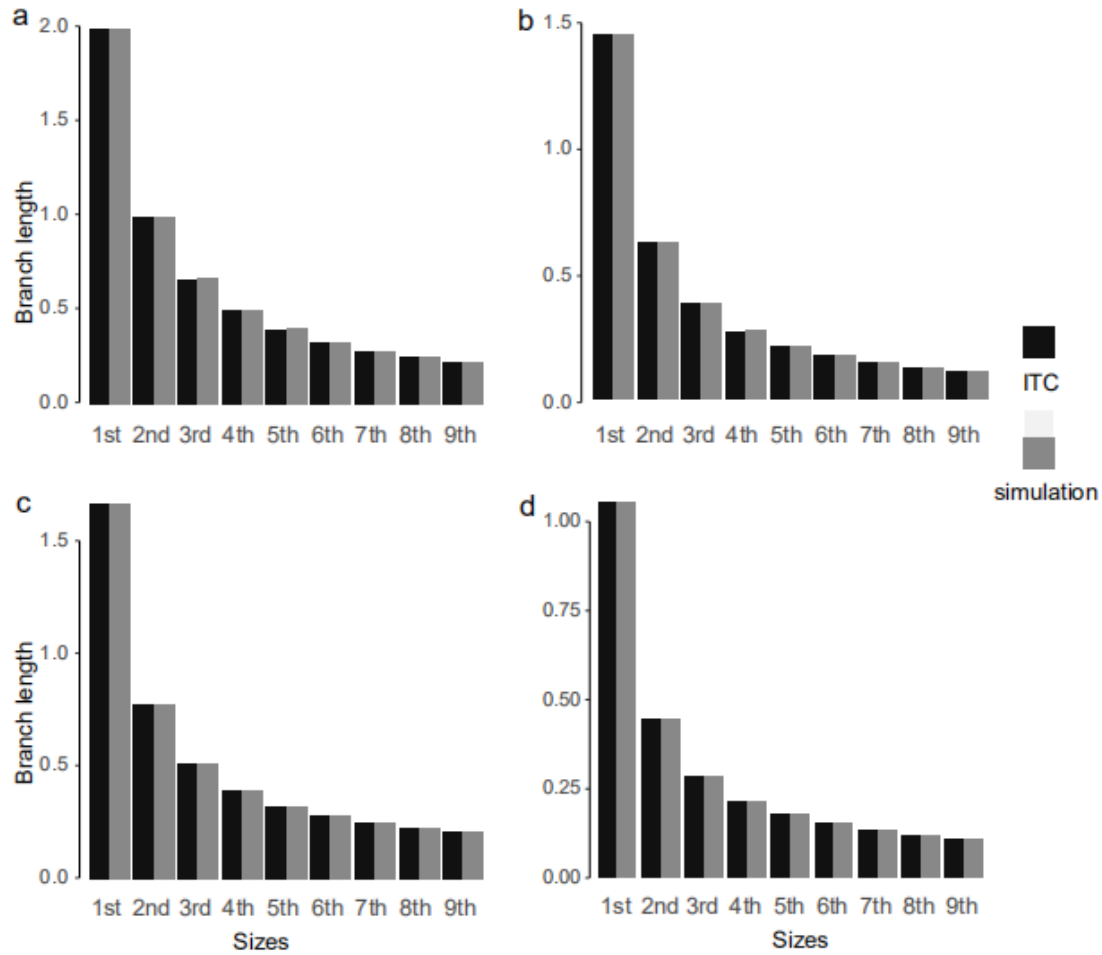

1216

1217 **Figure S35. Comparison of the expected branch lengths of FitCoal and the average**

1218 **branch lengths of coalescent simulations.** (a) Constant size model. (b) Exponential

1219 growth model. (c) Bottleneck model. (d) Complex model. The models, the related

1220 parameters, and the ms command lines are described above.  $n = 10$ . To calculate the

1221 average, the number of iterations is  $10^6$  for coalescent simulations.

1222

1223 **Table S1. Proportion of correctly-inferred change type for the most recent**  
1224 **demographic event in six models.**

| Model                  | Proportion |
|------------------------|------------|
| Constant size          | 100%       |
| Instantaneous increase | 85.5%      |
| PSMC “standard”        | 100%       |
| Exponential growth I   | 41.5%      |
| Exponential growth II  | 61%        |
| Exponential growth III | 66.5%      |

1225

1226 **Table S2. Parameters of the super bottleneck in 1000GP African populations.**

| Population | Ancestral<br>Ne | Start time of the<br>bottleneck |                             | Ne during<br>the<br>bottleneck | End time of the<br>bottleneck |                             | Ne<br>immediate.<br>after the<br>bottleneck |
|------------|-----------------|---------------------------------|-----------------------------|--------------------------------|-------------------------------|-----------------------------|---------------------------------------------|
|            |                 | Time <sup>a</sup>               | Change<br>type <sup>b</sup> |                                | Time <sup>a</sup>             | Change<br>type <sup>b</sup> |                                             |
| ACB        | 71,705          | 854,288                         | I                           | 1,021                          | 772,422                       | I                           | 27,802                                      |
| ASW        | 75,746          | 877,763                         | I                           | 767                            | 815,473                       | I                           | 25,302                                      |
| ESN        | 116,216         | 966,439                         | I                           | 1,735                          | 785,741                       | I                           | 26,785                                      |
| GWD        | 111,486         | 922,296                         | I                           | 1,311                          | 790,048                       | I                           | 26,546                                      |
| LWK        | 92,952          | 891,086                         | I                           | 954                            | 802,498                       | I                           | 27,142                                      |
| MSL        | 128,666         | 1,002,553                       | I                           | 2,031                          | 773,633                       | I                           | 29,183                                      |
| YRI        | 58,563          | 887,367                         | I                           | 1,066                          | 812,636                       | I                           | 26,796                                      |

1227 **Note:** a: Time in years. b: I represents instantaneous change, and E represents exponential  
 1228 change.

1229

1230 **Table S3. Parameters of the super bottleneck in HGDP-CEPH African populations.**

| Population | Ancestral<br>Ne | Start time of the<br>bottleneck |                             | Ne during<br>the<br>bottleneck | End time of the<br>bottleneck |                             | Ne<br>immediately<br>after the<br>bottleneck |
|------------|-----------------|---------------------------------|-----------------------------|--------------------------------|-------------------------------|-----------------------------|----------------------------------------------|
|            |                 | Time <sup>a</sup>               | Change<br>type <sup>b</sup> |                                | Time <sup>a</sup>             | Change<br>type <sup>b</sup> |                                              |
| Biaka      | 70,583          | 1,202,743                       | E                           | 908                            | 855,778                       | I                           | 35,329                                       |
| Mandenka   | 120,452         | 1,526,972                       | E                           | 1,319                          | 864,078                       | I                           | 27,306                                       |
| Yoruba     | 134,958         | 1,041,950                       | I                           | 1,670                          | 856,750                       | I                           | 27,569                                       |

1231 **Note:** a: Time in years. b: I represents instantaneous change, and E represents exponential  
 1232 change.

1233



1234 **Table S4. Parameters of the out-of-Africa bottleneck in 1000GP non-African**  
 1235 **populations.**

| Super population | Population | Ancestral Ne | Start time of the bottleneck |                          | Ne during the bottleneck |
|------------------|------------|--------------|------------------------------|--------------------------|--------------------------|
|                  |            |              | Time <sup>a</sup>            | Change type <sup>b</sup> |                          |
| EUR              | CEU        | 20,414       | 290,251                      | I                        | 9,168                    |
|                  | GBR        | 19,334       | 383,068                      | E                        | 7,343                    |
|                  | FIN        | 21,278       | 348,509                      | I                        | 9,612                    |
|                  | IBS        | 19,393       | 391,678                      | E                        | 7,270                    |
|                  | TSI        | 22,215       | 756,179                      | E                        | 8,505                    |
| EAS              | CDX        | 20,414       | 421,701                      | I                        | 9,168                    |
|                  | CHB        | 19,334       | 188,134                      | E                        | 7,343                    |
|                  | CHS        | 21,278       | 196,219                      | I                        | 9,612                    |
|                  | JPT        | 19,393       | 377,347                      | E                        | 7,270                    |
|                  | KHV        | 22,215       | 439,168                      | E                        | 8,505                    |
| SAS              | BEB        | 19,998       | 422,436                      | E                        | 7,584                    |
|                  | GIH        | 20,941       | 591,769                      | E                        | 8,554                    |
|                  | ITU        | 19,912       | 244,308                      | I                        | 9,091                    |
|                  | PJL        | 20,556       | 518,059                      | E                        | 8,257                    |
|                  | STU        | 18,848       | 174,620                      | I                        | 8,157                    |
| AMR              | CLM        | 19,252       | 242,526                      | I                        | 9,482                    |
|                  | MXL        | 20,063       | 444,463                      | E                        | 7,266                    |
|                  | PEL        | 20,666       | 222,966                      | I                        | 6,384                    |
|                  | PUR        | 18,917       | 344,023                      | E                        | 7,606                    |

1236 **Note:** a: Time in years. b: I represents instantaneous change, and E represents exponential  
 1237 change.

1238

1239 **Table S5. Parameters of the out-of-Africa bottleneck in HGDP-CEPH non-African**  
 1240 **populations.**

| Super population      | Population  | Ancestral Ne | Start time of the bottleneck |                          | Ne during the bottleneck |
|-----------------------|-------------|--------------|------------------------------|--------------------------|--------------------------|
|                       |             |              | Time <sup>a</sup>            | Change type <sup>b</sup> |                          |
| Middle East           | Bedouin     | 19,410       | 420,348                      | E                        | 8,793                    |
|                       | Druze       | 19,930       | 428,504                      | E                        | 8,275                    |
|                       | Mozabite    | 19,932       | 497,224                      | E                        | 8,904                    |
|                       | Palestinian | 19,733       | 513,178                      | E                        | 11,795                   |
| European              | Adygei      | 20,467       | 443,402                      | E                        | 7,934                    |
|                       | Basque      | 21,848       | 627,518                      | E                        | 8,315                    |
|                       | French      | 21,469       | 623,958                      | E                        | 8,496                    |
|                       | Russian     | 19,836       | 209,860                      | I                        | 8,647                    |
|                       | Sardinian   | 20,065       | 385,155                      | E                        | 7,183                    |
| East Asian            | Han         | 19,055       | 167,289                      | I                        | 6,365                    |
|                       | Japanese    | 20,303       | 357,997                      | E                        | 5,532                    |
|                       | Yakut       | 20,012       | 206,684                      | I                        | 7,526                    |
| Central & South Asian | Balochi     | 19,618       | 334,493                      | E                        | 7,635                    |
|                       | Brahui      | 20,095       | 375,825                      | E                        | 7,897                    |
|                       | Burusho     | 19,846       | 325,186                      | E                        | 7,127                    |
|                       | Hazara      | 19,765       | 310,990                      | E                        | 6,780                    |
|                       | Kalash      | 19,766       | 286,505                      | E                        | 6,346                    |
|                       | Makrani     | 19,497       | 324,241                      | E                        | 7,297                    |
|                       | Pathan      | 19,283       | 245,899                      | E                        | 6,364                    |
| Sindhi                | 19,758      | 344,223      | E                            | 7,493                    |                          |
| American              | Maya        | 20,847       | 270,478                      | E                        | 3,365                    |

1241 **Note:** a: Time in years. b: I represents instantaneous change, and E represents exponential  
 1242 change.

1243

1244

1245

**Table S6. The super bottleneck parameters of Bottleneck I model.**

| Parameter                             | Value   | Median of estimations | Lower bound of 95% CI | Upper bound of 95% CI |
|---------------------------------------|---------|-----------------------|-----------------------|-----------------------|
| Start time of the bottleneck          | 912,000 | 978,024               | 790,776               | 1,890,528             |
| End time of the bottleneck            | 792,000 | 764,376               | 685,656               | 794,784               |
| Population size before the bottleneck | 93,000  | 62,224                | 32,334                | 130,445               |
| Population size during the bottleneck | 1,300   | 1,907                 | 546                   | 5,838                 |
| Population size after the bottleneck  | 27,000  | 27,069                | 26,936                | 27,230                |

1246

1247 **Table S7. The super bottleneck parameters of Bottleneck IV model.**

| Parameter                             | Value   | Median of estimations | Lower bound of 95% CI | Upper bound of 95% CI |
|---------------------------------------|---------|-----------------------|-----------------------|-----------------------|
| Start time of the bottleneck          | 984,000 | 1,072,368             | 894,648               | 1,899,288             |
| End time of the bottleneck            | 864,000 | 854,256               | 774,360               | 873,672               |
| Population size before the bottleneck | 110,000 | 72,408                | 31,934                | 140,463               |
| Population size during the bottleneck | 1,300   | 1,677                 | 638                   | 5,536                 |
| Population size after the bottleneck  | 28,000  | 27,965                | 27,817                | 28,203                |

1248

1249

1250 **Table S8. The super bottleneck parameters of Bottleneck VII model.**

| Parameter                             | Value   | Median of estimations | Lower bound of 95% CI | Upper bound of 95% CI |
|---------------------------------------|---------|-----------------------|-----------------------|-----------------------|
| Start time of the bottleneck          | 840,000 | 887,088               | 736,560               | 1,419,480             |
| End time of the bottleneck            | 720,000 | 719,712               | 650,688               | 1,126,176             |
| Population size before the bottleneck | 30,000  | 31,513                | 25,356                | 132,364               |
| Population size during the bottleneck | 3,000   | 2,892                 | 328                   | 7,682                 |
| Population size after the bottleneck  | 30,000  | 3,0002                | 29,924                | 30,086                |

1251

1252

1253 **Table S9. Influence of different log-likelihood promotion thresholds.**

| Model                  | 30%          |         |             | 20%          |         |             | 10%          |         |             |
|------------------------|--------------|---------|-------------|--------------|---------|-------------|--------------|---------|-------------|
|                        | Underfitting | Correct | Overfitting | Underfitting | Correct | Overfitting | Underfitting | Correct | Overfitting |
| Constant size          | ...          | 100%    | 0           | ...          | 100%    | 0           | ...          | 93%     | 2%          |
| Instantaneous increase | 0            | 100%    | 0           | 0            | 100%    | 0           | 0            | 99.5%   | 0.5%        |
| PSMC “standard”        | 0            | 100%    | 0           | 0            | 100%    | 0           | 0            | 100%    | 0           |
| Exponential growth II  | 0            | 100%    | 0           | 0            | 100%    | 0           | 0            | 99.5%   | 0.5%        |
| Exponential growth III | 0            | 100%    | 0           | 0            | 100%    | 0           | 0            | 100%    | 0           |
| PSMC sim-YH            | 0            | 100%    | 0           | 0            | 100%    | 0           | 0            | 99.5%   | 0.5%        |
| PSMC sim-1             | 0            | 100%    | 0           | 0            | 100%    | 0           | 0            | 100%    | 0           |
| PSMC sim-2             | 20%          | 80%     | 0           | 0            | 100%    | 0           | 0            | 100%    | 0           |
| PSMC sim-3             | 0            | 100%    | 0           | 0            | 100%    | 0           | 0            | 98%     | 2%          |
| Complicated I          | 0            | 100%    | 0           | 0            | 100%    | 0           | 0            | 100%    | 0           |
| Complicated II         | 0            | 100%    | 0           | 0            | 100%    | 0           | 0            | 100%    | 0           |
| Exponential growth IV  | 0            | 100%    | 0           | 0            | 100%    | 0           | 0            | 100%    | 0           |
| Exponential growth V   | 0            | 100%    | 0           | 0            | 100%    | 0           | 0            | 100%    | 0           |
| Exponential growth VI  | 0            | 100%    | 0           | 0            | 100%    | 0           | 0            | 100%    | 0           |
| Split I pop 1          | 0            | 100%    | 0           | 0            | 100%    | 0           | 0            | 99.5%   | 0.5%        |
| Split I pop 2          | 0            | 100%    | 0           | 0            | 100%    | 0           | 0            | 99.5%   | 0.5%        |
| Split II pop 1         | 0            | 100%    | 0           | 0            | 100%    | 0           | 0            | 100%    | 0           |
| Split II pop 2         | 0            | 100%    | 0           | 0            | 100%    | 0           | 0            | 100%    | 0           |
| Split III pop 1        | 0            | 100%    | 0           | 0            | 100%    | 0           | 0            | 100%    | 0           |
| Split III pop 2        | 0            | 100%    | 0           | 0            | 100%    | 0           | 0            | 100%    | 0           |

1254 **Table S10. Information of truncated SFS of 1000GP populations.**

| Population | Size of SFS<br>( $n - 1$ ) | Truncated sizes<br>of SFS | Proportion of<br>truncated sizes (%) | Proportion of<br>truncated SNPs<br>(%) |
|------------|----------------------------|---------------------------|--------------------------------------|----------------------------------------|
| ACB        | 191                        | 171 – 191                 | 10.99                                | 3.17                                   |
| ASW        | 121                        | 107 – 121                 | 12.40                                | 3.66                                   |
| BEB        | 171                        | 156 – 171                 | 9.36                                 | 4.00                                   |
| CDX        | 185                        | 174 – 185                 | 6.49                                 | 3.56                                   |
| CEU        | 197                        | 178 – 197                 | 10.15                                | 4.39                                   |
| CHB        | 205                        | 180 – 205                 | 12.68                                | 5.34                                   |
| CHS        | 209                        | 191 – 209                 | 9.09                                 | 4.17                                   |
| CLM        | 187                        | 163 – 187                 | 13.37                                | 5.49                                   |
| ESN        | 197                        | 182 – 197                 | 8.12                                 | 2.67                                   |
| FIN        | 197                        | 181 – 197                 | 8.63                                 | 4.19                                   |
| GBR        | 181                        | 151 – 181                 | 17.13                                | 6.60                                   |
| GIH        | 205                        | 189 – 205                 | 8.29                                 | 3.75                                   |
| GWD        | 225                        | 208 – 225                 | 8.00                                 | 2.59                                   |
| IBS        | 213                        | 179 – 213                 | 16.43                                | 6.29                                   |
| ITU        | 203                        | 186 – 203                 | 8.87                                 | 3.88                                   |
| JPT        | 207                        | 182 – 207                 | 12.56                                | 5.26                                   |
| KHV        | 197                        | 181 – 197                 | 8.63                                 | 4.21                                   |
| LWK        | 197                        | 174 – 197                 | 12.18                                | 3.39                                   |
| MSL        | 169                        | 147 – 169                 | 13.61                                | 3.63                                   |
| MXL        | 127                        | 114 – 127                 | 11.02                                | 5.49                                   |
| PEL        | 169                        | 152 – 169                 | 10.65                                | 6.21                                   |
| PJL        | 191                        | 177 – 191                 | 7.85                                 | 3.54                                   |
| PUR        | 207                        | 174 – 207                 | 16.43                                | 5.77                                   |
| STU        | 203                        | 171 – 203                 | 16.26                                | 5.79                                   |
| TSI        | 213                        | 197 – 213                 | 7.98                                 | 3.78                                   |
| YRI        | 215                        | 189 – 215                 | 12.56                                | 3.50                                   |

1255

1256

1257 **Table S11. Proportion of SNPs without or with missing data of HGDP-CEPH**  
 1258 **populations.**

| Population  | No missing data (%) | Missing samples <= 2 chromosomes (%) |
|-------------|---------------------|--------------------------------------|
| Adygei      | 92.58               | 98.80                                |
| Balochi     | 91.01               | 98.37                                |
| Basque      | 92.66               | 98.83                                |
| Bedouin     | 87.00               | 97.30                                |
| Biaka       | 93.25               | 98.03                                |
| Brahui      | 90.76               | 98.37                                |
| Burusho     | 91.30               | 98.55                                |
| Druze       | 89.60               | 97.86                                |
| French      | 88.78               | 98.14                                |
| Han         | 84.54               | 97.14                                |
| Hazara      | 92.53               | 98.76                                |
| Japanese    | 87.45               | 97.96                                |
| Kalash      | 90.57               | 98.48                                |
| Makrani     | 91.10               | 98.29                                |
| Mandenka    | 91.93               | 98.13                                |
| Maya        | 94.98               | 99.13                                |
| Mozabite    | 93.21               | 98.58                                |
| Palestinian | 87.22               | 97.32                                |
| Pathan      | 91.74               | 98.60                                |
| Russian     | 92.68               | 98.68                                |
| Sardinian   | 93.04               | 98.81                                |
| Sindhi      | 90.73               | 98.43                                |
| Yakut       | 86.66               | 97.80                                |
| Yoruba      | 92.78               | 98.02                                |

1259  
 1260  
 1261



1262 **Table S12. Information of truncated SFS of HGDP-CEPH populations.**

| Population  | Size of SFS<br>( $n - 1$ ) | Truncated sizes<br>of SFS | Proportion of<br>truncated sizes (%) | Proportion of<br>truncated SNPs<br>(%) |
|-------------|----------------------------|---------------------------|--------------------------------------|----------------------------------------|
| Adygei      | 31                         | 28 – 31                   | 12.90                                | 5.65                                   |
| Balochi     | 47                         | 40 – 47                   | 17.02                                | 7.22                                   |
| Basque      | 45                         | 41 – 45                   | 11.11                                | 6.18                                   |
| Bedouin     | 91                         | 73 – 91                   | 20.88                                | 9.52                                   |
| Biaka       | 43                         | 36 – 43                   | 18.60                                | 4.93                                   |
| Brahui      | 49                         | 44 – 49                   | 12.24                                | 5.21                                   |
| Burusho     | 47                         | 41 – 47                   | 14.89                                | 6.57                                   |
| Druze       | 83                         | 70 – 83                   | 16.87                                | 8.24                                   |
| French      | 55                         | 50 – 56                   | 10.91                                | 5.59                                   |
| Han         | 85                         | 67 – 85                   | 22.35                                | 8.72                                   |
| Hazara      | 37                         | 32 – 37                   | 16.22                                | 6.72                                   |
| Japanese    | 53                         | 45 – 53                   | 16.98                                | 6.95                                   |
| Kalash      | 43                         | 40 – 43                   | 9.30                                 | 5.22                                   |
| Makrani     | 49                         | 41 – 49                   | 18.37                                | 7.24                                   |
| Mandenka    | 43                         | 37 – 43                   | 16.28                                | 4.75                                   |
| Maya        | 41                         | 37 – 41                   | 12.20                                | 7.20                                   |
| Mozabite    | 53                         | 44 – 53                   | 18.87                                | 7.43                                   |
| Palestinian | 91                         | 78 – 91                   | 15.38                                | 8.53                                   |
| Pathan      | 47                         | 35 – 49                   | 27.66                                | 10.12                                  |
| Russian     | 49                         | 40 – 49                   | 20.41                                | 8.06                                   |
| Sardinian   | 55                         | 51 – 55                   | 27.27                                | 11.65                                  |
| Sindhi      | 47                         | 41 – 47                   | 14.89                                | 6.35                                   |
| Yakut       | 49                         | 39 – 49                   | 22.45                                | 10.02                                  |
| Yoruba      | 43                         | 38 – 43                   | 13.95                                | 4.14                                   |

1263

1264

1265 **Table S13. Comparison of branch length between theoretical values and FitCoal**  
 1266 **under the constant size model.**

| <i>n</i> = 5     |                    |                |
|------------------|--------------------|----------------|
| Type             | Theoretical length | FitCoal length |
| 1                | 2.000000000000     | 1.999999995001 |
| 2                | 1.000000000000     | 0.999999995001 |
| 3                | 0.666666666667     | 0.666666661667 |
| 4                | 0.500000000000     | 0.499999995000 |
| <i>n</i> = 1,000 |                    |                |
| Type             | Theoretical length | FitCoal length |
| 1                | 2.000000000000     | 1.999999999979 |
| 100              | 0.020000000000     | 0.019999999980 |
| 200              | 0.010000000000     | 0.009999999980 |
| 300              | 0.006666666667     | 0.006666666647 |
| 400              | 0.005000000000     | 0.004999999980 |
| 500              | 0.004000000000     | 0.003999999980 |
| 600              | 0.003333333333     | 0.003333333313 |
| 700              | 0.002857142857     | 0.002857142837 |
| 800              | 0.002500000000     | 0.002499999980 |
| 900              | 0.002222222222     | 0.002222222202 |
| 999              | 0.002002002002     | 0.002002001982 |

1267  
 1268

**Table S14. Comparison of accuracy between FitCoal and Z-W's method.**

| Constant size model        |              |              |                        |
|----------------------------|--------------|--------------|------------------------|
| size                       | Z-W's method | FitCoal      | Tabulated FitCoal      |
| 1                          | 1.9999999999 | 1.9999999977 | 2.0000000000           |
| 2                          | 0.9999999999 | 0.9999999977 | 1.0000000000           |
| 3                          | 0.6666666666 | 0.6666666644 | 0.6666666666           |
| 4                          | 0.4999999999 | 0.4999999977 | 0.5000000000           |
| 5                          | 0.3999999999 | 0.3999999977 | 0.4000000000           |
| 6                          | 0.3333333333 | 0.3333333311 | 0.3333333333           |
| 7                          | 0.2857142857 | 0.2857142834 | 0.2857142857           |
| 8                          | 0.2499999999 | 0.2499999977 | 0.2500000000           |
| 9                          | 0.2222222222 | 0.2222222200 | 0.2222222222           |
| Instantaneous growth model |              |              |                        |
| size                       | Z-W's method | FitCoal      | Tabulated FitCoal      |
| 1                          | 1.7547171613 | 1.7547178684 | 1.7547229380           |
| 2                          | 0.7797340922 | 0.7797345132 | 0.7797375358           |
| 3                          | 0.4686921135 | 0.4686923318 | 0.4686939043           |
| 4                          | 0.3218480766 | 0.3218481580 | 0.3218487511           |
| 5                          | 0.2394397929 | 0.2394397884 | 0.2394397658           |
| 6                          | 0.1883537444 | 0.1883536920 | 0.1883533260           |
| 7                          | 0.1545070379 | 0.1545069652 | 0.1545064537           |
| 8                          | 0.1309436073 | 0.1309435332 | 0.1309430117           |
| 9                          | 0.1138668845 | 0.1138668210 | 0.1138663751           |
| Bottleneck model           |              |              |                        |
| size                       | Z-'s method  | FitCoal      | FitCoal with tabulated |
| 1                          | 1.6737287481 | 1.6737298163 | 1.6737374623           |
| 2                          | 0.7744529188 | 0.7744529447 | 0.7744538197           |
| 3                          | 0.5109730563 | 0.5109727763 | 0.5109715354           |
| 4                          | 0.3927621211 | 0.3927618350 | 0.3927603900           |
| 5                          | 0.3264269184 | 0.3264267194 | 0.3264256821           |
| 6                          | 0.2832102142 | 0.2832101093 | 0.2832095492           |
| 7                          | 0.2519772704 | 0.2519772388 | 0.2519770488           |
| 8                          | 0.2277455013 | 0.2277455192 | 0.2277455704           |
| 9                          | 0.2080244642 | 0.2080245126 | 0.2080247051           |

1271 **Table S15. Comparison of accuracy between FitCoal and simulations.**

| Constant size model      |                   |             |                   |
|--------------------------|-------------------|-------------|-------------------|
| Type                     | Simulation method | FitCoal     | Tabulated FitCoal |
| 1                        | 1.999529551       | 1.999999998 | 2.000000000       |
| 2                        | 0.999720720       | 0.999999998 | 1.000000000       |
| 3                        | 0.667102715       | 0.666666664 | 0.666666667       |
| 4                        | 0.500240165       | 0.499999998 | 0.500000000       |
| 5                        | 0.400967708       | 0.399999998 | 0.400000000       |
| 6                        | 0.333256388       | 0.333333331 | 0.333333333       |
| 7                        | 0.285465389       | 0.285714283 | 0.285714286       |
| 8                        | 0.249471384       | 0.249999998 | 0.250000000       |
| 9                        | 0.222272679       | 0.222222220 | 0.222222222       |
| Exponential growth model |                   |             |                   |
| Type                     | Simulation method | FitCoal     | Tabulated FitCoal |
| 1                        | 1.441789518       | 1.441679286 | 1.441673129       |
| 2                        | 0.616556332       | 0.616509230 | 0.616508244       |
| 3                        | 0.376438453       | 0.376743719 | 0.376742859       |
| 4                        | 0.269168704       | 0.268510898 | 0.268510338       |
| 5                        | 0.207984340       | 0.208373433 | 0.208373096       |
| 6                        | 0.170848693       | 0.170519845 | 0.170519652       |
| 7                        | 0.144555420       | 0.144603196 | 0.144603091       |
| 8                        | 0.125837330       | 0.125751961 | 0.125751908       |
| 9                        | 0.111364011       | 0.111402468 | 0.111402445       |
| Bottleneck model         |                   |             |                   |
| Type                     | Simulation method | FitCoal     | Tabulated FitCoal |
| 1                        | 1.673321651       | 1.673732814 | 1.673741394       |
| 2                        | 0.775051787       | 0.774454488 | 0.774457584       |
| 3                        | 0.510960086       | 0.510973534 | 0.510974557       |
| 4                        | 0.394262151       | 0.392762187 | 0.392762519       |
| 5                        | 0.325116671       | 0.326426872 | 0.326426966       |
| 6                        | 0.284039310       | 0.283210170 | 0.283210115       |
| 7                        | 0.251717509       | 0.251977260 | 0.251977042       |
| 8                        | 0.228240338       | 0.227745526 | 0.227745129       |
| 9                        | 0.207539986       | 0.208024514 | 0.208023953       |
| Complex model            |                   |             |                   |

| Type | Simulation method | FitCoal     | Tabulated FitCoal |
|------|-------------------|-------------|-------------------|
| 1    | 1.055607245       | 1.055618949 | 1.055592252       |
| 2    | 0.444340081       | 0.444811898 | 0.444812747       |
| 3    | 0.285522751       | 0.285500848 | 0.285501081       |
| 4    | 0.215995323       | 0.215622334 | 0.215622470       |
| 5    | 0.176447487       | 0.176540313 | 0.176540331       |
| 6    | 0.151750997       | 0.151231386 | 0.151231289       |
| 7    | 0.133173783       | 0.133109963 | 0.133109779       |
| 8    | 0.118845125       | 0.119172606 | 0.119172375       |
| 9    | 0.107810932       | 0.107899199 | 0.107898957       |

1272

1273 **Table S16. Likelihood promotion rate of inferred demographic histories with**  
 1274 **different inference time intervals of 1000GP populations.**

| Super population | Population | Rate compared with result of ( $k-1$ ) inference time intervals (%) |         |        |       |
|------------------|------------|---------------------------------------------------------------------|---------|--------|-------|
|                  |            | 2                                                                   | 3       | 4      | 5     |
| AFR              | ACB        | 1384.26                                                             | 350.31  | 60.09  | 18.68 |
|                  | ASW        | 3538.08                                                             | 130.56  | 93.48  | 6.10  |
|                  | ESN        | 714.05                                                              | 35.23   | 126.18 | 17.37 |
|                  | GWD        | 590.15                                                              | 302.50  | 112.43 | 13.01 |
|                  | LWK        | 2925.80                                                             | 91.55   | 70.91  | 5.88  |
|                  | MSL        | 2935.78                                                             | 43.91   | 60.37  | 8.62  |
|                  | YRI        | 861.84                                                              | 166.36  | 69.09  | 7.07  |
| EUR              | CEU        | 135.51                                                              | 2471.16 | 17.07  | ...   |
|                  | FIN        | 341.55                                                              | 541.28  | 9.03   | ...   |
|                  | GBR        | 65.68                                                               | 2900.65 | 22.20  | 2.50  |
|                  | IBS        | 384.43                                                              | 2289.75 | 25.85  | 4.34  |
|                  | TSI        | 236.98                                                              | 2286.49 | 7.09   | ...   |
| EAS              | CDX        | 49.99                                                               | 4430.87 | 15.64  | ...   |
|                  | CHB        | 175.03                                                              | 5343.87 | 10.80  | ...   |
|                  | CHS        | 111.49                                                              | 4384.47 | 10.26  | ...   |
|                  | JPT        | 56.37                                                               | 4100.17 | 24.05  | 6.76  |
|                  | KHV        | 153.13                                                              | 4242.29 | 7.67   | ...   |
| SAS              | BEB        | 319.95                                                              | 2491.42 | 11.33  | ...   |
|                  | GIH        | 101.31                                                              | 1982.75 | 8.66   | ...   |
|                  | ITU        | 261.16                                                              | 1836.98 | 18.17  | ...   |
|                  | PJL        | 254.33                                                              | 1884.50 | 11.41  | ...   |
|                  | STU        | 284.42                                                              | 2590.84 | 9.89   | ...   |
| AMR              | CLM        | 834.67                                                              | 1867.06 | 17.44  | ...   |
|                  | MXL        | 347.01                                                              | 4258.47 | 10.01  | ...   |
|                  | PEL        | 359.65                                                              | 5549.64 | 16.19  | ...   |
|                  | PUR        | 1335.08                                                             | 967.44  | 22.39  | 11.29 |

1275

1276 **Table S17. Likelihood promotion rate of inferred demographic histories with**  
 1277 **different inference time intervals of HGDP-CEPH populations.**

| Super population | Population  | Rate compared with result of ( $k-1$ ) inference time intervals (%) |         |       |      |
|------------------|-------------|---------------------------------------------------------------------|---------|-------|------|
|                  |             | 2                                                                   | 3       | 4     | 5    |
|                  | Biaka       | 387.67                                                              | 931.28  | 58.4  | 0.42 |
| AFR              | Mandenka    | 2350.47                                                             | 31.56   | 13.81 | ...  |
|                  | Yoruba      | 3157.91                                                             | 24.28   | 67.73 | 0.35 |
| ME               | Bedouin     | 282.02                                                              | 87.97   | 1.89  | ...  |
|                  | Druze       | 33.15                                                               | 218.35  | 1.68  | ...  |
|                  | Mozabite    | 275.41                                                              | 130.64  | 2.99  | ...  |
|                  | Palestinian | 195.99                                                              | 102.86  | 1.2   | ...  |
| EUR              | Adygei      | 179.37                                                              | 98.23   | 0.37  | ...  |
|                  | Basque      | 336.87                                                              | 42.2    | 0.78  | ...  |
|                  | French      | 48.25                                                               | 201.88  | 0.58  | ...  |
|                  | Russian     | 75.68                                                               | 97.53   | 0.27  | ...  |
|                  | Sardinian   | 105.69                                                              | 649.27  | 1.04  | ...  |
| EAS              | Han         | 59.53                                                               | 201.39  | 0.95  | ...  |
|                  | Japanese    | 86.6                                                                | 154.89  | 0.41  | ...  |
|                  | Yakut       | 287.46                                                              | 43.19   | 0.23  | ...  |
| CSA              | Balochi     | 40.25                                                               | 244.48  | 0.78  | ...  |
|                  | Brahui      | 27.24                                                               | 276.49  | 0.6   | ...  |
|                  | Burusho     | 75.72                                                               | 115.73  | 0.21  | ...  |
|                  | Hazara      | 95.97                                                               | 159.24  | 1.05  | ...  |
|                  | Kalash      | 1465.6                                                              | 11.76   | ...   | ...  |
|                  | Makrani     | 106.68                                                              | 112.25  | 0.35  | ...  |
|                  | Pathan      | 28.68                                                               | 218.83  | 0.31  | ...  |
|                  | Sindhi      | 69.31                                                               | 170.14  | 0.29  | ...  |
| AMR              | Maya        | 136.19                                                              | 1813.04 | 5.16  | ...  |

1278

1279

1280 **Table S18. Probabilities of each state (the number of ancestral lineages remained) at**  
 1281 **time  $t$ .**

| Standard<br>coalescent<br>time | $n$ | Number of ancestral lineages remained |        |        |        |        |        |        |        |
|--------------------------------|-----|---------------------------------------|--------|--------|--------|--------|--------|--------|--------|
|                                |     | 1                                     | 2      | 3      | 4      | 5      | 6      | 7      | else   |
| 0.6                            | 30  | 1.92%                                 | 17.22% | 38.16% | 30.57% | 10.39% | 1.62%  | 0.12%  | <0.01% |
| 0.6                            | 40  | 1.64%                                 | 15.62% | 36.9%  | 31.85% | 11.78% | 2.03%  | 0.17%  | 0.01%  |
| 0.6                            | 50  | 1.49%                                 | 14.67% | 36.06% | 32.55% | 12.68% | 2.32%  | 0.21%  | 0.01%  |
| 0.6                            | 180 | 1.11%                                 | 12.05% | 33.27% | 34.28% | 15.53% | 3.37%  | 0.37%  | 0.02%  |
| 0.6                            | 200 | 1.09%                                 | 11.96% | 33.15% | 34.34% | 15.65% | 3.42%  | 0.38%  | 0.02%  |
| 0.6                            | 220 | 1.08%                                 | 11.88% | 33.05% | 34.38% | 15.74% | 3.46%  | 0.38%  | 0.02%  |
| 0.8                            | 30  | 7.32%                                 | 36.36% | 40.14% | 14.22% | 1.86%  | 0.1%   | <0.01% | <0.01% |
| 0.8                            | 40  | 6.73%                                 | 34.93% | 40.68% | 15.36% | 2.17%  | 0.12%  | <0.01% | <0.01% |
| 0.8                            | 50  | 6.38%                                 | 34.05% | 40.96% | 16.08% | 2.38%  | 0.14%  | <0.01% | <0.01% |
| 0.8                            | 180 | 5.44%                                 | 31.41% | 41.56% | 18.27% | 3.09%  | 0.22%  | 0.01%  | <0.01% |
| 0.8                            | 200 | 5.4%                                  | 31.31% | 41.58% | 18.36% | 3.12%  | 0.22%  | 0.01%  | <0.01% |
| 0.8                            | 220 | 5.37%                                 | 31.22% | 41.59% | 18.43% | 3.15%  | 0.22%  | 0.01%  | <0.01% |
| 1.0                            | 30  | 15.99%                                | 48.88% | 29.75% | 5.09%  | 0.28%  | 0.01%  | <0.01% | <0.01% |
| 1.0                            | 40  | 15.18%                                | 48.17% | 30.73% | 5.58%  | 0.33%  | 0.01%  | <0.01% | <0.01% |
| 1.0                            | 50  | 14.7%                                 | 47.72% | 31.32% | 5.89%  | 0.36%  | 0.01%  | <0.01% | <0.01% |
| 1.0                            | 180 | 13.35%                                | 46.29% | 33%    | 6.88%  | 0.48%  | 0.01%  | <0.01% | <0.01% |
| 1.0                            | 200 | 13.29%                                | 46.23% | 33.06% | 6.92%  | 0.48%  | 0.01%  | <0.01% | <0.01% |
| 1.0                            | 220 | 13.25%                                | 46.18% | 33.12% | 6.95%  | 0.49%  | 0.01%  | <0.01% | <0.01% |
| 1.2                            | 30  | 26.31%                                | 53.05% | 18.95% | 1.65%  | 0.04%  | <0.01% | <0.01% | <0.01% |
| 1.2                            | 40  | 25.42%                                | 52.97% | 19.75% | 1.82%  | 0.05%  | <0.01% | <0.01% | <0.01% |
| 1.2                            | 50  | 24.89%                                | 52.89% | 20.23% | 1.93%  | 0.05%  | <0.01% | <0.01% | <0.01% |
| 1.2                            | 180 | 23.37%                                | 52.6%  | 21.69% | 2.27%  | 0.07%  | <0.01% | <0.01% | <0.01% |
| 1.2                            | 200 | 23.31%                                | 52.59% | 21.74% | 2.29%  | 0.07%  | <0.01% | <0.01% | <0.01% |
| 1.2                            | 220 | 23.26%                                | 52.58% | 21.79% | 2.3%   | 0.07%  | <0.01% | <0.01% | <0.01% |

1282

1283 Note: the highlighted area represents that, when  $t \geq 1.0$ , the number of ancestral lineages  
 1284 remained is no more than 3 in more than 90% cases.

1285



1286  
1287

1288 **References**

- 1289 1 Fu, Y. X. Statistical properties of segregating sites. *Theor. Popul. Biol.* **48**, 172-  
1290 197 (1995).
- 1291 2 Zivković, D. & Wiehe, T. Second-order moments of segregating sites under  
1292 variable population size. *Genetics* **180**, 341-357 (2008).
- 1293 3 Li, H. & Stephan, W. Inferring the demographic history and rate of adaptive  
1294 substitution in *Drosophila*. *PLoS Genet.* **2**, e166 (2006).
- 1295 4 Hudson, R. R. Two-locus sampling distributions and their application.  
1296 *Genetics* **159**, 1805-1817 (2001).
- 1297 5 Kim, Y. & Stephan, W. Detecting a local signature of genetic hitchhiking along  
1298 a recombining chromosome. *Genetics* **160**, 765-777 (2002).
- 1299 6 Fay, J. C. & Wu, C.-I. Hitchhiking under positive Darwinian selection. *Genetics*  
1300 **155**, 1405-1413 (2000).
- 1301 7 Fu, Y. X. & Li, W. H. Statistical tests of neutrality of mutations. *Genetics* **133**,  
1302 693-709 (1993).
- 1303 8 Tajima, F. Statistical method for testing the neutral mutation hypothesis by  
1304 DNA polymorphism. *Genetics* **123**, 585-595 (1989).
- 1305 9 Polanski, A., Bobrowski, A. & Kimmel, M. A note on distributions of times to  
1306 coalescence, under time-dependent population size. *Theor. Popul. Biol.* **63**,  
1307 33-40 (2003).
- 1308 10 Bhaskar, A. & Song, Y. S. Descartes' rule of signs and the identifiability of  
1309 population demographic models from genomic variation data. *Ann. Stat.* **42**,  
1310 2469-2493 (2014).
- 1311 11 Hsieh, P. *et al.* Model-based analyses of whole-genome data reveal a complex  
1312 evolutionary history involving archaic introgression in Central African  
1313 Pygmies. *Genome Res.* **26**, 291-300 (2016).
- 1314 12 Lopez, M. *et al.* The demographic history and mutational load of African  
1315 hunter-gatherers and farmers. *Nat. Ecol. Evol.* **2**, 721-730 (2018).
- 1316 13 Schlebusch, C. M. & Jakobsson, M. Tales of human migration, admixture, and  
1317 selection in Africa. *Annu. Rev. Genomics Hum. Genet.* **19**, 405-428 (2018).
- 1318 14 Skoglund, P. *et al.* Reconstructing prehistoric African population structure.  
1319 *Cell* **171**, 59-71 (2017).
- 1320 15 Durvasula, A. & Sankararaman, S. Recovering signals of ghost archaic  
1321 introgression in African populations. *Sci. Adv.* **6**, eaax5097 (2020).
- 1322 16 Beerli, P. Effect of unsampled populations on the estimation of population  
1323 sizes and migration rates between sampled populations. *Mol. Ecol.* **13**, 827-  
1324 836 (2004).
- 1325 17 Hudson, R. R. Generating samples under a Wright-Fisher neutral model of  
1326 genetic variation. *Bioinformatics* **18**, 337-338 (2002).
- 1327 18 Chen, G. K., Marjoram, P. & Wall, J. D. Fast and flexible simulation of DNA  
1328 sequence data. *Genome Res.* **19**, 136-142 (2009).

1329 19 Boyko, A. R. *et al.* Assessing the evolutionary impact of amino acid mutations  
1330 in the human genome. *PLoS Genet.* **4**, e1000083 (2008).  
1331 20 Li, H. & Durbin, R. Inference of human population history from individual  
1332 whole-genome sequences. *Nature* **475**, 493-496 (2011).  
1333 21 Gutenkunst, R. N., Hernandez, R. D., Williamson, S. H. & Bustamante, C. D.  
1334 Inferring the joint demographic history of multiple populations from  
1335 multidimensional SNP frequency data. *PLoS Genet.* **5**, e1000695 (2009).  
1336 22 Liu, X. M. & Fu, Y. X. Exploring population size changes using SNP frequency  
1337 spectra. *Nat. Genet.* **47**, 555-559 (2015).

1338
